# Supplementary material for: Evaluation of the DNA Barcodes in Dendrobium (Orchidaceae) from Mainland Asia
Source: PubMed Central journal article supplement (PMC4300225; doi:10.1371/journal.pone.0115168), 2015-01-20

# **Evaluation of the DNA barcodes in *Dendrobium* (Orchidaceae) from mainland Asia**

Songzhi Xu<sup>1</sup>, Dezhu Li<sup>2</sup>, Jianwu Li<sup>3</sup>, Xiaoguo Xiang<sup>1</sup>, Weitao Jin<sup>1</sup>, Weichang Huang<sup>4</sup>, Xiaohua Jin<sup>1\*</sup> & Luqi Huang<sup>5\*</sup>

<sup>1</sup>*State Key Laboratory of Systematic and Evolutionary Botany, Institute of Botany, Chinese Academy of Sciences, Beijing 100093, P. R. China (xusongzhi2013@ibcas.ac.cn, xiangxg2010@ibcas.ac.cn, jinweitao@ibcas.ac.cn, xiaohuajin@ibcas.ac.cn)*

<sup>2</sup>*Key Laboratory for Plant Diversity and Biogeography of East Asia, Kunming Institute of Botany, Chinese Academy of Sciences, Kunming, Yunnan 650201, China (dzl@mail.kib.ac.cn)*

<sup>3</sup>*Xishuangbanna Tropical Botanical Garden, Chinese Academy of Sciences, Menglun Township, Mengla County, Yunnan 666303, China (ljw@xtbg.org.cn)*

<sup>4</sup>*Shanghai Chenshan Botanical Garden, Chenhua Road 3888, Songjiang, Shanghai 201602, China (hwc\_zx@126.com)*

<sup>5</sup>*National Resource Centre for Chinese Material Medica, China Academy of Chinese Medical Science, Beijing 100700, China (huangluqi01@126.com)*

, Corresponding author:

Go to [cnzkqjwclpBkdecu00p.huangluqi01@126.com](mailto:huangluqi01@126.com)

## Legends

**Table S1** Main information in prior study about DNA barcoding in *Dendrobium*.

**Table S2** Samples and voucher information for the *Dendrobium* species used in this study (the accession numbers in red represent sequences which were newly submitted).

**Table S3** Gradient evaluation of ITS+*matK* in *Dendrobium*.

**Table S4** Summary of species identification success rate based on distance method, NJ tree and the program TaxonDNA in *Paphiopedilum*.

**Table S5** Summary of species identification success rate based on distance method, NJ tree and the program TaxonDNA in *Ficus*.

**Table S6** Summary of species identification success rate based on distance method, NJ tree and the program TaxonDNA in *Pedicularis*.

**Table S7** Summary of species identification success rate based on distance method, NJ tree and the program TaxonDNA in *Lysimachia*.

**Table S8** Wilcoxon signed-rank tests of intra- and inter-specific divergence among five single loci.

**Figure S1** 50% consensus NJ tree based on ITS for *Dendrobium* species. Numbers on branches represent NJ support values.

**Figure S2** 50% consensus NJ tree based on ITS2 for *Dendrobium* species. Numbers on branches represent NJ support values.

**Figure S3** 50% consensus NJ tree based on *matK* for *Dendrobium* species. Numbers on branches represent NJ support values.

**Figure S4** 50% consensus NJ tree based on *rbcL* for *Dendrobium* species. Numbers on branches represent NJ support values.

**Figure S5** 50% consensus NJ tree based on *trnH-psbA* for *Dendrobium* species. Numbers on branches represent NJ support values.

**Figure S6** 50% consensus NJ tree based on ITS+*matK* for *Dendrobium* species. Numbers on branches represent NJ support values.

**Figure S7** 50% consensus NJ tree based on ITS2+*matK* for *Dendrobium* species. Numbers on branches represent NJ support values.

**Figure S8** 50% consensus NJ tree based on *matK+rbcL* for *Dendrobium* species. Numbers on branches represent NJ support values.

**Figure S9** 50% consensus NJ tree based on ITS+*trnH-psbA* for *Dendrobium* species. Numbers on branches represent NJ support values.

**Figure S10** 50% consensus NJ tree based on *matK+trnH-psbA* for *Dendrobium* species. Numbers on branches represent NJ support values.

**Figure S11** 50% consensus NJ tree based on ITS+*matK+trnH-psbA* for *Dendrobium* species. Numbers on branches represent NJ support values.

**Table S1** Main information in prior study about DNA barcoding in *Dendrobium*.

| Author               | No. of sample                                      | Maker                               | Method                     | Bacode proposed  |
|----------------------|----------------------------------------------------|-------------------------------------|----------------------------|------------------|
| Lau et al., 2001     | 16 species                                         | ITS2                                | Diastance method and UPGMA | ITS2             |
| Xu et al., 2005      | 18 species                                         | ITS (ITS1, ITS2)                    | Diastance method           | ITS (ITS1, ITS2) |
| Yao et al., 2009     | 17 species                                         | <i>trnH-psbA</i>                    | Diastance method           | <i>trnH-psbA</i> |
| Asahina et al., 2010 | 5 species                                          | <i>matK</i> , <i>rbcl</i>           | Diastance method and NJ    | <i>matK</i>      |
| Singh et al., 2012   | Data set I: 36 species;<br>Data set II: 52 species | 5 single makers and 11 combinations | Diastance method           | ITS              |

**Table S2 Samples and voucher information for the *Dendrobium* species used in this study (the accession numbers in red represent sequences which were newly submitted).**

| <b>Taxon</b>                       | <b>Voucher</b>    | <b>ITS/ITS2</b> |
|------------------------------------|-------------------|-----------------|
| <i>Dendrobium acinaciforme</i>     | Yun-99038         | AF362034        |
| <i>Dendrobium acinaciforme</i>     | PS2527MT01        | HQ114253        |
| <i>Dendrobium acinaciforme</i>     | Jin X-H 10742     | KF143512        |
| <i>Dendrobium acinaciforme</i>     | Jin X-H 7757      | KF143513        |
| <i>Dendrobium acinaciforme</i>     | Jin X.H. 9284     | <b>KJ210408</b> |
| <i>Dendrobium adae</i>             | JMB101            | EU430371        |
| <i>Dendrobium aduncum</i>          | S19               | GU339110        |
| <i>Dendrobium aduncum</i>          | SBB-0309          | JF713083        |
| <i>Dendrobium aduncum</i>          | Yunnan native A1  | JN388580        |
| <i>Dendrobium aduncum</i>          | Jin X-H 9522      | KF143428        |
| <i>Dendrobium aduncum</i>          | Jin X.H.059       | <b>KJ210409</b> |
| <i>Dendrobium aduncum</i>          | Jin X.H.060       | <b>KJ210410</b> |
| <i>Dendrobium aduncum</i>          | Jin X.H.061       | <b>KJ210411</b> |
| <i>Dendrobium aduncum</i>          | Jin X.H.062       | <b>KJ210412</b> |
| <i>Dendrobium aemulum</i>          | JMB152            | EU430372        |
| <i>Dendrobium aggregatum</i>       | Jin X-H s.n. 10   | KF143429        |
| <i>Dendrobium aloifolium</i>       | Clements 9168     | AY239951        |
| <i>Dendrobium amethystoglossum</i> | Cootes(ORG 1482)  | AY239952        |
| <i>Dendrobium amoenum</i>          | SBB-0135          | HM054534        |
| <i>Dendrobium amoenum</i>          | SBB-0137          | HM054535        |
| <i>Dendrobium amoenum</i>          | SBB-0138          | HM054536        |
| <i>Dendrobium amoenum</i>          | SBB-0139          | HM054537        |
| <i>Dendrobium amoenum</i>          | SBB-0140          | HM054538        |
| <i>Dendrobium amoenum</i>          | SBB-0142          | HM054539        |
| <i>Dendrobium amoenum</i>          | SBB-0247          | HM054540        |
| <i>Dendrobium amoenum</i>          | SBB-0248          | HM054541        |
| <i>Dendrobium amoenum</i>          | SBB-0249          | HM054542        |
| <i>Dendrobium amoenum</i>          | SBB-0029          | HM054543        |
| <i>Dendrobium amoenum</i>          | SBB-0560          | HM054544        |
| <i>Dendrobium amoenum</i>          | SBB-0575          | HM054545        |
| <i>Dendrobium amoenum</i>          | SBB-0576          | HM054546        |
| <i>Dendrobium amplum</i>           | SBB-0489          | JN114489        |
| <i>Dendrobium anceps</i>           | Clements 9309     | AY239953        |
| <i>Dendrobium anceps</i>           | SBB-0119          | HM054547        |
| <i>Dendrobium anceps</i>           | SBB-0301          | HM054548        |
| <i>Dendrobium anceps</i>           | SBB-0548          | JF713084        |
| <i>Dendrobium anosmum</i>          | Guangxi native A1 | JN388570        |
| <i>Dendrobium aphyllum</i>         | SBB-0306          | HM054551        |
| <i>Dendrobium aphyllum</i>         | SBB-0536          | HM054552        |
| <i>Dendrobium aphyllum</i>         | SBB-0552          | HM054553        |
| <i>Dendrobium aphyllum</i>         | SBB-0553          | HM054554        |
| <i>Dendrobium aphyllum</i>         | SBB-0561          | HM054555        |
| <i>Dendrobium aphyllum</i>         | SBB-0595          | HM054556        |
| <i>Dendrobium aphyllum</i>         | SBB-0596          | HM054557        |
| <i>Dendrobium aphyllum</i>         | SBB-0598          | HM054558        |
| <i>Dendrobium aphyllum</i>         | SBB-0599          | HM054559        |
| <i>Dendrobium aphyllum</i>         | SBB-0600          | HM054560        |
| <i>Dendrobium aphyllum</i>         | SBB-0628          | HM054561        |
| <i>Dendrobium aphyllum</i>         | Jin X-H 10798     | KF143430        |
| <i>Dendrobium aphyllum</i>         | Jin X-H 10765     | <b>KJ210413</b> |

|                                  |                     |          |
|----------------------------------|---------------------|----------|
| <i>Dendrobium aphyllum</i>       | Jin X.H.063         | KJ210415 |
| <i>Dendrobium aqueum</i>         | SBB-0303            | HM054562 |
| <i>Dendrobium aqueum</i>         | SBB-0030            | HM054563 |
| <i>Dendrobium aqueum</i>         | SBB-0359            | HM054564 |
| <i>Dendrobium aqueum</i>         | SBB-0360            | HM054565 |
| <i>Dendrobium aqueum</i>         | SBB-0361            | HM054566 |
| <i>Dendrobium aqueum</i>         | SBB-0362            | HM054567 |
| <i>Dendrobium aqueum</i>         | SBB-0363            | HM054568 |
| <i>Dendrobium aqueum</i>         | SBB-0364            | HM054569 |
| <i>Dendrobium aqueum</i>         | SBB-0367            | HM054570 |
| <i>Dendrobium aqueum</i>         | SBB-0382            | HM054571 |
| <i>Dendrobium aqueum</i>         | SBB-1051            | JF713085 |
| <i>Dendrobium barbatulum</i>     | SBB-0407            | HM054572 |
| <i>Dendrobium barbatulum</i>     | SBB-0408            | HM054573 |
| <i>Dendrobium barbatulum</i>     | SBB-0409            | HM054574 |
| <i>Dendrobium barbatulum</i>     | SBB-0410            | HM054575 |
| <i>Dendrobium barbatulum</i>     | SBB-0411            | HM054576 |
| <i>Dendrobium barbatulum</i>     | SBB-0413            | HM054577 |
| <i>Dendrobium barbatulum</i>     | SBB-0415            | HM054578 |
| <i>Dendrobium barbatulum</i>     | SBB-0412            | JF713086 |
| <i>Dendrobium barbatulum</i>     | SBB-0414            | JF713087 |
| <i>Dendrobium barbatulum</i>     | SBB-0416            | JF713088 |
| <i>Dendrobium bellatulum</i>     | Yunnan-0310-01      | EU592015 |
| <i>Dendrobium bellatulum</i>     | Jin X-H 5699        | KF143431 |
| <i>Dendrobium bellatulum</i>     | Jin X.H. 10837      | KJ210419 |
| <i>Dendrobium bellatulum</i>     | Jin X.H.065         | KJ210420 |
| <i>Dendrobium bensoniae</i>      | SBB-0543            | HM054579 |
| <i>Dendrobium bensoniae</i>      | SBB-0544            | HM054580 |
| <i>Dendrobium bicameratum</i>    | SBB-0213            | HM054581 |
| <i>Dendrobium bicameratum</i>    | SBB-0215            | HM054582 |
| <i>Dendrobium bicameratum</i>    | SBB-0216            | HM054583 |
| <i>Dendrobium bicameratum</i>    | SBB-0217            | HM054584 |
| <i>Dendrobium bicameratum</i>    | SBB-0221            | HM054585 |
| <i>Dendrobium bicameratum</i>    | SBB-0222            | HM054586 |
| <i>Dendrobium bicameratum</i>    | SBB-0223            | HM054587 |
| <i>Dendrobium bicameratum</i>    | SBB-0226            | HM054588 |
| <i>Dendrobium bicameratum</i>    | SBB-0228            | HM054589 |
| <i>Dendrobium bicameratum</i>    | SBB-0239            | HM054590 |
| <i>Dendrobium bicameratum</i>    | SBB-0028            | HM054591 |
| <i>Dendrobium bifalce</i>        | JMB169              | EU430373 |
| <i>Dendrobium bracteosum</i>     | CBG 750451          | AY239954 |
| <i>Dendrobium brymerianum</i>    | Yun-99028           | AF362036 |
| <i>Dendrobium brymerianum</i>    | PS2510MT01          | HQ114233 |
| <i>Dendrobium brymerianum</i>    | Yunnan native B1    | JN388581 |
| <i>Dendrobium brymerianum</i>    | Jin X-H 10782       | KF143432 |
| <i>Dendrobium brymerianum</i>    | Jin X.H.066         | KJ210422 |
| <i>Dendrobium brymerianum</i>    | Jin X.H. 11044      | KJ210423 |
| <i>Dendrobium callitrophilum</i> | JMB173              | EU430374 |
| <i>Dendrobium campocentrum</i>   | Clements 5830       | AY239955 |
| <i>Dendrobium canaliculatum</i>  | JMB51               | EU430375 |
| <i>Dendrobium candidum</i>       | NCHU-D89331201-1028 | HM590391 |
| <i>Dendrobium capillipes</i>     | Yun-99052           | AF362035 |
| <i>Dendrobium capillipes</i>     | PS2502MT01          | HQ114224 |
| <i>Dendrobium capillipes</i>     | Yunnan native C1    | JN388582 |

|                                   |                     |                 |
|-----------------------------------|---------------------|-----------------|
| <i>Dendrobium capillipes</i>      | Jin X-H 10757       | KF143433        |
| <i>Dendrobium capituliflorum</i>  | Clements 6319       | AY239956        |
| <i>Dendrobium cariniferum</i>     | Yun-99050           | AF362027        |
| <i>Dendrobium cariniferum</i>     | Jin X-H 13012       | KF143434        |
| <i>Dendrobium carrii</i>          | JMB16               | EU430376        |
| <i>Dendrobium cauliculimentum</i> | ORG 3598            | AY239957        |
| <i>Dendrobium ceraula</i>         | ORG 2921            | AY239958        |
| <i>Dendrobium cerinum</i>         | Cootes (ORG 3585)   | AY239959        |
| <i>Dendrobium chameleon</i>       | ORG 3590            | AY239960        |
| <i>Dendrobium chameleon</i>       | NCHU-D89331201-1019 | HM590385        |
| <i>Dendrobium christyanum</i>     | S13                 | GU339106        |
| <i>Dendrobium christyanum</i>     | Jin X-H 11045       | KF143441        |
| <i>Dendrobium christyanum</i>     | Jin X-H s.n. 3      | KF143442        |
| <i>Dendrobium christyanum</i>     | Jin X.H.067         | <b>KJ210425</b> |
| <i>Dendrobium chrysanthum</i>     | SBB-0033            | HM054592        |
| <i>Dendrobium chrysanthum</i>     | SBB-0503            | HM054593        |
| <i>Dendrobium chrysanthum</i>     | SBB-0563            | HM054594        |
| <i>Dendrobium chrysanthum</i>     | SBB-0618            | HM054595        |
| <i>Dendrobium chrysanthum</i>     | SBB-0619            | HM054596        |
| <i>Dendrobium chrysanthum</i>     | SBB-0620            | HM054597        |
| <i>Dendrobium chrysanthum</i>     | SBB-0621            | HM054598        |
| <i>Dendrobium chrysanthum</i>     | SBB-0622            | HM054599        |
| <i>Dendrobium chrysanthum</i>     | SBB-1010            | JF713089        |
| <i>Dendrobium chrysanthum</i>     | SBB-1019            | JF713090        |
| <i>Dendrobium chrysanthum</i>     | SBB-0504            | JF713091        |
| <i>Dendrobium chrysanthum</i>     | SBB-0583            | JF713092        |
| <i>Dendrobium chrysanthum</i>     | Jin X-H 11430       | KF143443        |
| <i>Dendrobium chrysanthum</i>     | SET-ET 1274         | <b>KJ210428</b> |
| <i>Dendrobium chrysanthum</i>     | SET-ET 1186         | <b>KJ210429</b> |
| <i>Dendrobium chryseum</i>        | Yun-99045           | AF362044        |
| <i>Dendrobium chryseum</i>        | NCHU-D89331201-1009 | HM590375        |
| <i>Dendrobium chryseum</i>        | CMU DC 0609         | EU121419        |
| <i>Dendrobium chryseum</i>        | Jin X.H.064         | <b>KJ210416</b> |
| <i>Dendrobium chryseum</i>        | Jin X-H 10363       | <b>KJ210417</b> |
| <i>Dendrobium chryseum</i>        | Jin X.H. 10840      | <b>KJ210418</b> |
| <i>Dendrobium chrysotoxum</i>     | Yun-99014           | AF362023        |
| <i>Dendrobium chrysotoxum</i>     | NCHU-D89331201-1017 | HM590383        |
| <i>Dendrobium chrysotoxum</i>     | SBB-0515            | HM054600        |
| <i>Dendrobium chrysotoxum</i>     | SBB-0516            | HM054601        |
| <i>Dendrobium chrysotoxum</i>     | SBB-0517            | HM054602        |
| <i>Dendrobium chrysotoxum</i>     | PS2501MT01          | HQ114221        |
| <i>Dendrobium chrysotoxum</i>     | PS2501MT02          | HQ114222        |
| <i>Dendrobium chrysotoxum</i>     | PS2501MT03          | HQ114223        |
| <i>Dendrobium chrysotoxum</i>     | Yunnan native C4    | JN388585        |
| <i>Dendrobium chrysotoxum</i>     | N. Sattayasai 2     | KC413407        |
| <i>Dendrobium chrysotoxum</i>     | Jin X-H 10731       | KF143444        |
| <i>Dendrobium confusum</i>        | Banks (ORG 1391)    | AY239961        |
| <i>Dendrobium crepidatum</i>      | SBB-0057            | HM054615        |
| <i>Dendrobium crepidatum</i>      | SBB-0059            | HM054616        |
| <i>Dendrobium crepidatum</i>      | SBB-0060            | HM054617        |
| <i>Dendrobium crepidatum</i>      | SBB-0061            | HM054618        |
| <i>Dendrobium crepidatum</i>      | SBB-0062            | HM054619        |
| <i>Dendrobium crepidatum</i>      | SBB-0063            | HM054620        |
| <i>Dendrobium crepidatum</i>      | SBB-0064            | HM054621        |

|                                  |                         |          |
|----------------------------------|-------------------------|----------|
| <i>Dendrobium crepidatum</i>     | SBB-0067                | HM054622 |
| <i>Dendrobium crepidatum</i>     | SBB-0069                | HM054623 |
| <i>Dendrobium crepidatum</i>     | SBB-0070                | HM054624 |
| <i>Dendrobium crepidatum</i>     | Jin X-H 10843           | KF143446 |
| <i>Dendrobium crepidatum</i>     | Jin X.H.069             | KJ210430 |
| <i>Dendrobium crepidatum</i>     | Jin X.H.070             | KJ210431 |
| <i>Dendrobium crepidatum</i>     | Jin X.H.071             | KJ210432 |
| <i>Dendrobium crepidatum</i>     | Jin X.H.072             | KJ210433 |
| <i>Dendrobium crumenatum</i>     | Clements 4890           | AY239963 |
| <i>Dendrobium crumenatum</i>     | M.W.K.Goh P703          | AY273696 |
| <i>Dendrobium crumenatum</i>     | NCHU-D89331201-1004     | HM590370 |
| <i>Dendrobium crumenatum</i>     | SBB-0124                | HM054625 |
| <i>Dendrobium crumenatum</i>     | SBB-0291                | JF713095 |
| <i>Dendrobium crumenatum</i>     | SBB-0316                | JF713096 |
| <i>Dendrobium crumenatum</i>     | Yunnan native C6        | JN388587 |
| <i>Dendrobium crystallinum</i>   | S6                      | GU339116 |
| <i>Dendrobium crystallinum</i>   | PS2519MT01              | HQ114243 |
| <i>Dendrobium crystallinum</i>   | Jin X-H 11031           | KF143447 |
| <i>Dendrobium crystallinum</i>   | Jin X.H. 6959           | KJ210434 |
| <i>Dendrobium cyanocentrum</i>   | Spence(Clements 8709)   | AY239964 |
| <i>Dendrobium denneanum</i>      | CMU DD 0739             | EU840702 |
| <i>Dendrobium denneanum</i>      | Guangxi native A3       | JN388572 |
| <i>Dendrobium denneanum</i>      | Jin X-H 10899           | KF143448 |
| <i>Dendrobium denneanum</i>      | Jin X-H 10840           | KF143449 |
| <i>Dendrobium denneanum</i>      | Jin X-H & Lai Y-J 11011 | KF143450 |
| <i>Dendrobium denneanum</i>      | NCHU-D89331201-1021     | HM590387 |
| <i>Dendrobium densiflorum</i>    | MH-GZ03-1               | DQ058786 |
| <i>Dendrobium densiflorum</i>    | SBB-0120                | HM054626 |
| <i>Dendrobium densiflorum</i>    | SBB-0547                | HM054627 |
| <i>Dendrobium densiflorum</i>    | PS2528MT01              | HQ114254 |
| <i>Dendrobium densiflorum</i>    | SBB-0027                | JF713097 |
| <i>Dendrobium densiflorum</i>    | Jin X.H. 10108          | KJ210435 |
| <i>Dendrobium densiflorum</i>    | Jin X.H.073             | KJ210436 |
| <i>Dendrobium densiflorum</i>    | Jin X.H.074             | KJ210437 |
| <i>Dendrobium densiflorum</i>    | Jin X.H. 10108-2        | KJ210438 |
| <i>Dendrobium densiflorum</i>    | Jin X.H. 10108-3        | KJ210439 |
| <i>Dendrobium densiflorum</i>    | SET-ET 1272-1           | KJ210440 |
| <i>Dendrobium denudans</i>       | Jin X-H 8510            | KF143452 |
| <i>Dendrobium denudans</i>       | TBG<JPN>:132760         | AB593547 |
| <i>Dendrobium devonianum</i>     | PS2520MT01              | HQ114244 |
| <i>Dendrobium devonianum</i>     | SBB-1011                | JF713098 |
| <i>Dendrobium devonianum</i>     | SBB-0513                | JF713099 |
| <i>Dendrobium devonianum</i>     | SBB-0514                | JF713100 |
| <i>Dendrobium devonianum</i>     | TBG<JPN>:124383         | AB593548 |
| <i>Dendrobium devonianum</i>     | Jin X-H 10302           | KF143453 |
| <i>Dendrobium devonianum</i>     | Jin X.H. 9902           | KJ210441 |
| <i>Dendrobium devonianum</i>     | Jin X.H. 11030          | KJ210442 |
| <i>Dendrobium devonianum</i>     | Jin X.H. 6947           | KJ210443 |
| <i>Dendrobium dixanthum</i>      | HH-JL03-1               | DQ058788 |
| <i>Dendrobium dixanthum</i>      | S23                     | GU339103 |
| <i>Dendrobium dixanthum</i>      | Jin X-H 13017           | KF143454 |
| <i>Dendrobium draconis</i>       | SBB-0546                | HM054628 |
| <i>Dendrobium draconis</i>       | SBB-0545                | JF713101 |
| <i>Dendrobium ellipsophyllum</i> | Banks (ORG 3581)        | AY239965 |



|                                    |                       |          |
|------------------------------------|-----------------------|----------|
| <i>Dendrobium ellipsophyllum</i>   | Yun-99029             | AF362033 |
| <i>Dendrobium ellipsophyllum</i>   | Jin X-H 13066         | KF143455 |
| <i>Dendrobium equitans</i>         | NCHU-D89331201-1023   | HM590388 |
| <i>Dendrobium eriiflorum</i>       | TBG<JPN>:140557       | AB593556 |
| <i>Dendrobium eserre</i>           | TBG<JPN>:133168       | AB593558 |
| <i>Dendrobium exile</i>            | Yun-99024             | AF362024 |
| <i>Dendrobium exile</i>            | Jin X-H 10776         | KF143456 |
| <i>Dendrobium exile</i>            | Jin X-H 10780         | KF143457 |
| <i>Dendrobium exile</i>            | Jin X.H.075           | KJ210444 |
| <i>Dendrobium exile</i>            | Jin X.H.076           | KJ210445 |
| <i>Dendrobium fairchildae</i>      | Cootes(Clements 1485) | AY239966 |
| <i>Dendrobium falconeri</i>        | XYD0006-32            | AY485708 |
| <i>Dendrobium falconeri</i>        | PS2516MT01            | HQ114239 |
| <i>Dendrobium falconeri</i>        | SBB-1013              | JF713102 |
| <i>Dendrobium falconeri</i>        | Jin X-H 8200          | KF143458 |
| <i>Dendrobium falconeri</i>        | Jin X.H.077           | KJ210446 |
| <i>Dendrobium falconeri</i>        | Jin X.H. 8977         | KJ210447 |
| <i>Dendrobium fanjingshanense</i>  | Jin X-H 10102         | KF143459 |
| <i>Dendrobium fanjingshanense</i>  | Jin X-H s.n. 13       | KF143460 |
| <i>Dendrobium fanjingshanense</i>  | Jin X.H.078           | KJ210448 |
| <i>Dendrobium fanjingshanense</i>  | Jin X.H.079           | KJ210449 |
| <i>Dendrobium farmeri</i>          | SBB-0537              | HM054629 |
| <i>Dendrobium farmeri</i>          | SBB-0538              | HM054630 |
| <i>Dendrobium farmeri</i>          | SBB-0549              | HM054631 |
| <i>Dendrobium fimbriatum</i>       | LS-JL031010-1         | AY842036 |
| <i>Dendrobium fimbriatum</i>       | CMU DF 0611           | EU003116 |
| <i>Dendrobium fimbriatum</i>       | NCHU-D89331201-1029   | HM590392 |
| <i>Dendrobium fimbriatum</i>       | SBB-0115              | HM054632 |
| <i>Dendrobium fimbriatum</i>       | SBB-0304              | HM054633 |
| <i>Dendrobium fimbriatum</i>       | SBB-0508              | HM054634 |
| <i>Dendrobium fimbriatum</i>       | SBB-0509              | HM054635 |
| <i>Dendrobium fimbriatum</i>       | SBB-0510              | HM054636 |
| <i>Dendrobium fimbriatum</i>       | SBB-0562              | HM054637 |
| <i>Dendrobium fimbriatum</i>       | PS2507MT01            | HQ114229 |
| <i>Dendrobium fimbriatum</i>       | Yunnan native F1      | JN388588 |
| <i>Dendrobium fimbriatum</i>       | Jin X-H s.n. 16       | KF143461 |
| <i>Dendrobium findleyanum</i>      | PS2531MT01            | HQ114257 |
| <i>Dendrobium findleyanum</i>      | Yunnan native F2      | JN388589 |
| <i>Dendrobium findleyanum</i>      | Jin X-H 11875         | KF143462 |
| <i>Dendrobium formosum</i>         | Phillips 457          | AY239967 |
| <i>Dendrobium fulgidum</i>         | Banks (ORG 3599)      | AY239968 |
| <i>Dendrobium gibsonii</i>         | S7                    | GU339105 |
| <i>Dendrobium goldfinchii</i>      | Clements 5860         | AY239969 |
| <i>Dendrobium goldschmidtianum</i> | ORG 3465              | AY239970 |
| <i>Dendrobium goldschmidtianum</i> | Chung S-W 12001       | KF143463 |
| <i>Dendrobium govidjoae</i>        | Clements 6810         | AY239971 |
| <i>Dendrobium gracilicaule</i>     | JMB103                | EU430382 |
| <i>Dendrobium gratiosissimum</i>   | ICMdgra2201-1         | AY485711 |
| <i>Dendrobium gratiosissimum</i>   | BQ-JL0401-1           | DQ058790 |
| <i>Dendrobium gratiosissimum</i>   | Yunnan native G1      | JN388590 |
| <i>Dendrobium gratiosissimum</i>   | Jin X-H 10781         | KF143464 |
| <i>Dendrobium gratiosissimum</i>   | Jin X-H 10758         | KF143465 |
| <i>Dendrobium gregulus</i>         | TBG<JPN>:132862       | AB593572 |
| <i>Dendrobium haemoglossum</i>     | SBB-0031              | HM054638 |

|                                     |                     |          |
|-------------------------------------|---------------------|----------|
| <i>Dendrobium haemoglossum</i>      | SBB-0289            | HM054639 |
| <i>Dendrobium haemoglossum</i>      | SBB-0114            | JF713103 |
| <i>Dendrobium haemoglossum</i>      | SBB-0317            | JF713104 |
| <i>Dendrobium hainanense</i>        | Jin X.H. 10161      | KJ210450 |
| <i>Dendrobium hainanense</i>        | Jin X.H. 10113-2    | KJ210451 |
| <i>Dendrobium hancockii</i>         | Yun-99042           | AF362025 |
| <i>Dendrobium hancockii</i>         | XY-GZ03-1           | DQ058787 |
| <i>Dendrobium hancockii</i>         | CMU DH 0613         | EU003120 |
| <i>Dendrobium hancockii</i>         | NCHU-D89331201-1011 | HM590377 |
| <i>Dendrobium hancockii</i>         | PS2533MT01          | HQ114259 |
| <i>Dendrobium hancockii</i>         | TBG<JPN>:122506     | AB593575 |
| <i>Dendrobium hancockii</i>         | Yunnan native H1    | JN388591 |
| <i>Dendrobium hancockii</i>         | Jin X-H 13492       | KF143467 |
| <i>Dendrobium harveyanum</i>        | PS2504MT01          | HQ114226 |
| <i>Dendrobium harveyanum</i>        | TBG<JPN>:133184     | AB593576 |
| <i>Dendrobium harveyanum</i>        | Yunnan native H3    | JN388594 |
| <i>Dendrobium harveyanum</i>        | Jin X-H 10760       | KF143468 |
| <i>Dendrobium harveyanum</i>        | Jin X.H. 10703      | KJ210452 |
| <i>Dendrobium hemimelanoglossum</i> | TBG<JPN>:133257     | AB593578 |
| <i>Dendrobium henanense</i>         | Jin X-H 9772        | KF143469 |
| <i>Dendrobium henanense</i>         | Jin X.H. 9235       | KJ210453 |
| <i>Dendrobium henryi</i>            | YN-ET 990           | KF143470 |
| <i>Dendrobium henryi</i>            | Jin X.H. 11048      | KJ210455 |
| <i>Dendrobium henryi</i>            | Jin X.H. 11822      | KJ210456 |
| <i>Dendrobium herbaceum</i>         | SBB-0042            | HM054652 |
| <i>Dendrobium herbaceum</i>         | SBB-0043            | HM054653 |
| <i>Dendrobium herbaceum</i>         | SBB-0044            | HM054654 |
| <i>Dendrobium herbaceum</i>         | SBB-0045            | HM054655 |
| <i>Dendrobium herbaceum</i>         | SBB-0046            | HM054656 |
| <i>Dendrobium herbaceum</i>         | SBB-0047            | HM054657 |
| <i>Dendrobium herbaceum</i>         | SBB-0048            | HM054658 |
| <i>Dendrobium herbaceum</i>         | SBB-0049            | HM054659 |
| <i>Dendrobium herbaceum</i>         | SBB-0050            | HM054660 |
| <i>Dendrobium herbaceum</i>         | SBB-0051            | HM054661 |
| <i>Dendrobium herbaceum</i>         | SBB-0052            | HM054662 |
| <i>Dendrobium herbaceum</i>         | SBB-0053            | HM054663 |
| <i>Dendrobium herbaceum</i>         | SBB-0093            | HM054664 |
| <i>Dendrobium herbaceum</i>         | SBB-0094            | HM054665 |
| <i>Dendrobium herbaceum</i>         | SBB-0095            | HM054666 |
| <i>Dendrobium hercoglossum</i>      | NCHU-D89331201-1015 | HM590381 |
| <i>Dendrobium hercoglossum</i>      | TBG<JPN>:118850     | AB593580 |
| <i>Dendrobium hercoglossum</i>      | Hainan native H2    | JN388576 |
| <i>Dendrobium hercoglossum</i>      | Jin X-H 10109       | KF143471 |
| <i>Dendrobium hercoglossum</i>      | Jin X-H s.n. 17     | KF143472 |
| <i>Dendrobium hercoglossum</i>      | Jin X.H. 9522       | KJ210457 |
| <i>Dendrobium heterocarpum</i>      | SBB-0502            | HM054667 |
| <i>Dendrobium heterocarpum</i>      | PS2512MT01          | HQ114235 |
| <i>Dendrobium heterocarpum</i>      | SBB-1008            | JF713105 |
| <i>Dendrobium heterocarpum</i>      | SBB-0993            | JF713106 |
| <i>Dendrobium heterocarpum</i>      | Yunnan native H2-1  | JN388592 |
| <i>Dendrobium heterocarpum</i>      | Yunnan native H2-2  | JN388593 |
| <i>Dendrobium heterocarpum</i>      | Jin X-H 12014       | KF143473 |
| <i>Dendrobium hookerianum</i>       | SET-ET 1137         | KF143474 |

|                                                         |                          |          |
|---------------------------------------------------------|--------------------------|----------|
| <i>Dendrobium hookerianum</i>                           | Jin X-H 10367            | KF143475 |
| <i>Dendrobium hookerianum</i>                           | Jin X.H. 9102            | KJ210458 |
| <i>Dendrobium huoshanense</i>                           | Anhui native H1          | JN388567 |
| <i>Dendrobium huoshanense</i>                           | Jin X-H 9768             | KF143476 |
| <i>Dendrobium indivisum</i>                             | Vaughn(Clements 5822a)   | AY239972 |
| <i>Dendrobium inflatum</i>                              | Clements 5820            | AY239973 |
| <i>Dendrobium infundibulum</i>                          | SBB-0529                 | HM054668 |
| <i>Dendrobium infundibulum</i>                          | SBB-0530                 | HM054669 |
| <i>Dendrobium infundibulum</i>                          | SBB-0991                 | JF713107 |
| <i>Dendrobium infundibulum</i>                          | Jin X-H 11877            | KF143477 |
| <i>Dendrobium ionopus</i>                               | Cootes (ORG 3589)        | AY239974 |
| <i>Dendrobium jenkinsii</i>                             | XHH-SC02-1               | DQ058785 |
| <i>Dendrobium jenkinsii</i>                             | SBB-0524                 | HM054670 |
| <i>Dendrobium jenkinsii</i>                             | SBB-0526                 | HM054671 |
| <i>Dendrobium jenkinsii</i>                             | PS2525MT01               | HQ114251 |
| <i>Dendrobium jenkinsii</i>                             | SBB-1018                 | JF713108 |
| <i>Dendrobium jenkinsii</i>                             | SBB-0525                 | JF713109 |
| <i>Dendrobium jenkinsii</i>                             | Yunnan native J1         | JN388595 |
| <i>Dendrobium jenkinsii</i>                             | Jin X-H 10709            | KF143478 |
| <i>Dendrobium jenkinsii</i>                             | Jin X-H s.n. 4           | KF143479 |
| <i>Dendrobium jenkinsii</i>                             | Jin X.H.080              | KJ210460 |
| <i>Dendrobium jonesii</i> var. <i>magnificum</i>        | JMB154                   | EU430383 |
| <i>Dendrobium junceum</i>                               | ORG 3588                 | AY239975 |
| <i>Dendrobium kingianum</i>                             | Chase O-164 (K)          | AF521075 |
| <i>Dendrobium kingianum</i> subsp. <i>carnarvonense</i> | JMB132                   | EU430384 |
| <i>Dendrobium kingianum</i> var. <i>kingianum</i>       | JMB137                   | EU430386 |
| <i>Dendrobium kingianum</i> var. <i>pulcherrimum</i>    | JMB136                   | EU430385 |
| <i>Dendrobium lancifolium</i>                           | Clements 9176            | AY239976 |
| <i>Dendrobium lawesii</i>                               | Spence D54               | AY239977 |
| <i>Dendrobium leonis</i>                                | ORG 1983                 | AY239978 |
| <i>Dendrobium leptocladum</i>                           | NCHU-D89331201-1007      | HM590373 |
| <i>Dendrobium linawianum</i>                            | CMC DL 0301              | EU003115 |
| <i>Dendrobium linawianum</i>                            | CMU DL(C) 0615           | EU003117 |
| <i>Dendrobium linawianum</i>                            | NCHU-D89331201-1005      | HM590371 |
| <i>Dendrobium linawianum</i>                            | TBG<JPN>:142429          | AB593599 |
| <i>Dendrobium lindleyi</i>                              | JU-ML03-1                | DQ058784 |
| <i>Dendrobium lindleyi</i>                              | SBB-0521                 | HM054672 |
| <i>Dendrobium lindleyi</i>                              | SBB-0523                 | HM054673 |
| <i>Dendrobium lindleyi</i>                              | SBB-0522                 | JF713110 |
| <i>Dendrobium lindleyi</i>                              | Guangdong native L1      | JN388568 |
| <i>Dendrobium lindleyi</i>                              | Jin X.H.081              | KJ210461 |
| <i>Dendrobium lituiflorum</i>                           | PS2532MT01               | HQ114258 |
| <i>Dendrobium lituiflorum</i>                           | TBG<JPN>:128908          | AB593602 |
| <i>Dendrobium loddigesii</i>                            | NCHU-D89331201-1008      | HM590374 |
| <i>Dendrobium loddigesii</i>                            | PS1748MT02               | HQ114220 |
| <i>Dendrobium loddigesii</i>                            | Guangdong native L2      | JN388569 |
| <i>Dendrobium loddigesii</i>                            | Jin X-H s.n. 15          | KF143481 |
| <i>Dendrobium lohohense</i>                             | Guangxi native L2        | JN388574 |
| <i>Dendrobium longicornu</i>                            | CJ-SC02-1                | DQ058796 |
| <i>Dendrobium longicornu</i>                            | SET-ET 1347              | KF143483 |
| <i>Dendrobium longicornu</i>                            | Kurzweil H & Lwin S 2647 | KF143484 |
| <i>Dendrobium longicornu</i>                            | Jin X-H 11663            | KF143485 |
| <i>Dendrobium longicornu</i>                            | YN-ET 76                 | KJ210462 |
| <i>Dendrobium longicornu</i>                            | Jin X.H. 7909b           | KJ210463 |

|                                 |                       |          |
|---------------------------------|-----------------------|----------|
| <i>Dendrobium longicornu</i>    | Jin X.H.082           | KJ210464 |
| <i>Dendrobium longicornu</i>    | Jin X.H. 9087         | KJ210465 |
| <i>Dendrobium longicornu</i>    | Jin X.H. 9517         | KJ210466 |
| <i>Dendrobium longicornu</i>    | Jin X.H.083           | KJ210467 |
| <i>Dendrobium longicornu</i>    | KL2647                | KJ210468 |
| <i>Dendrobium longicornu</i>    | Jin X.H.084           | KJ210469 |
| <i>Dendrobium longicornu</i>    | Jin X.H.085           | KJ210470 |
| <i>Dendrobium longicornu</i>    | Jin X.H. 11555        | KJ210471 |
| <i>Dendrobium longicornu</i>    | Jin X.H. 12038        | KJ210472 |
| <i>Dendrobium macrophyllum</i>  | Spence(Clements 8704) | AY239979 |
| <i>Dendrobium macrostachyum</i> | SBB-0013              | HM054685 |
| <i>Dendrobium macrostachyum</i> | SBB-0014              | HM054686 |
| <i>Dendrobium macrostachyum</i> | SBB-0017              | HM054687 |
| <i>Dendrobium macrostachyum</i> | SBB-0018              | HM054688 |
| <i>Dendrobium macrostachyum</i> | SBB-0019              | HM054689 |
| <i>Dendrobium macrostachyum</i> | SBB-0020              | HM054690 |
| <i>Dendrobium macrostachyum</i> | SBB-0021              | HM054691 |
| <i>Dendrobium macrostachyum</i> | SBB-0022              | HM054692 |
| <i>Dendrobium macrostachyum</i> | SBB-0023              | HM054693 |
| <i>Dendrobium macrostachyum</i> | SBB-0024              | HM054694 |
| <i>Dendrobium macrostachyum</i> | SBB-0286              | HM054695 |
| <i>Dendrobium macrostachyum</i> | SBB-0007              | HM054697 |
| <i>Dendrobium macrostachyum</i> | SBB-0008              | HM054698 |
| <i>Dendrobium macrostachyum</i> | SBB-0009              | HM054699 |
| <i>Dendrobium macrostachyum</i> | SBB-0287              | HM054696 |
| <i>Dendrobium menglaense</i>    | Jin X-H 10464         | KF143486 |
| <i>Dendrobium microbulbon</i>   | SBB-0333              | HM054700 |
| <i>Dendrobium microbulbon</i>   | SBB-0334              | HM054701 |
| <i>Dendrobium microbulbon</i>   | SBB-0335              | HM054702 |
| <i>Dendrobium microbulbon</i>   | SBB-0337              | HM054703 |
| <i>Dendrobium microbulbon</i>   | SBB-0338              | HM054704 |
| <i>Dendrobium microbulbon</i>   | SBB-0339              | HM054705 |
| <i>Dendrobium microbulbon</i>   | SBB-0340              | HM054706 |
| <i>Dendrobium microbulbon</i>   | SBB-0341              | HM054707 |
| <i>Dendrobium microbulbon</i>   | SBB-0342              | HM054708 |
| <i>Dendrobium minutiflorum</i>  | MH-SM0311-1           | DQ058800 |
| <i>Dendrobium minutiflorum</i>  | Jin X-H 10468         | KF143487 |
| <i>Dendrobium minutiflorum</i>  | Jin X-H 6979          | KF143488 |
| <i>Dendrobium miyakei</i>       | NCHU-D89331201-1020   | HM590386 |
| <i>Dendrobium miyakei</i>       | Jin X.H.086           | KJ210473 |
| <i>Dendrobium mohlianum</i>     | ORG 3603              | AY239980 |
| <i>Dendrobium moniliforme</i>   | CMC DM 0302           | EU003114 |
| <i>Dendrobium moniliforme</i>   | PS2522MT01            | HQ114246 |
| <i>Dendrobium moniliforme</i>   | Jin X-H 8960          | KF143489 |
| <i>Dendrobium moniliforme</i>   | Jin X-H 8957          | KF143490 |
| <i>Dendrobium moniliforme</i>   | Jin X-H 10895         | KF143491 |
| <i>Dendrobium moniliforme</i>   | Jin X.H.087           | KJ210474 |
| <i>Dendrobium moniliforme</i>   | Jin X.H. 10080        | KJ210475 |
| <i>Dendrobium moniliforme</i>   | Jin X.H.088           | KJ210476 |
| <i>Dendrobium moniliforme</i>   | Jin X.H.089           | KJ210477 |
| <i>Dendrobium moniliforme</i>   | Jin X.H.090           | KJ210478 |
| <i>Dendrobium moniliforme</i>   | Jin X.H. 8999         | KJ210479 |
| <i>Dendrobium moniliforme</i>   | Jin X.H. 6976         | KJ210480 |
| <i>Dendrobium moniliforme</i>   | Jin X.H.091           | KJ210481 |

|                                 |                  |          |
|---------------------------------|------------------|----------|
| <i>Dendrobium moniliforme</i>   | Jin X.H. 10921   | KJ210482 |
| <i>Dendrobium moniliforme</i>   | Jin X.H.092      | KJ210483 |
| <i>Dendrobium monophyllum</i>   | JMB172           | EU430387 |
| <i>Dendrobium monticola</i>     | ZN-SC02-1        | DQ058798 |
| <i>Dendrobium monticola</i>     | ZN-SM0311-1      | DQ058799 |
| <i>Dendrobium moorei</i>        | JMB155           | EU430388 |
| <i>Dendrobium morrisonii</i>    | Phillips 1069    | AY239982 |
| <i>Dendrobium moschatum</i>     | Clements 5808    | AY239983 |
| <i>Dendrobium moschatum</i>     | SBB-0026         | HM054709 |
| <i>Dendrobium moschatum</i>     | SBB-0322         | HM054710 |
| <i>Dendrobium moschatum</i>     | SBB-0511         | HM054711 |
| <i>Dendrobium moschatum</i>     | SBB-0512         | HM054712 |
| <i>Dendrobium moschatum</i>     | SBB-0567         | HM054713 |
| <i>Dendrobium moschatum</i>     | SBB-0568         | HM054714 |
| <i>Dendrobium moschatum</i>     | SBB-0569         | HM054715 |
| <i>Dendrobium moschatum</i>     | SBB-0630         | HM054716 |
| <i>Dendrobium moschatum</i>     | SBB-0116         | JF713111 |
| <i>Dendrobium mutabile</i>      | ORG 3608         | AY239984 |
| <i>Dendrobium nindii</i>        | Jones 4285       | AY239985 |
| <i>Dendrobium nobile</i>        | PS0766MT03       | HQ114217 |
| <i>Dendrobium nobile</i>        | PS0766MT05       | HQ114218 |
| <i>Dendrobium nobile</i>        | PS0766MT06       | HQ114219 |
| <i>Dendrobium nobile</i>        | SBB-0325         | JF713112 |
| <i>Dendrobium nobile</i>        | SBB-0539         | JF713113 |
| <i>Dendrobium nobile</i>        | SBB-0540         | JF713114 |
| <i>Dendrobium nobile</i>        | SBB-0541         | JF713115 |
| <i>Dendrobium nobile</i>        | SBB-0542         | JF713116 |
| <i>Dendrobium nobile</i>        | SBB-0550         | JF713117 |
| <i>Dendrobium nobile</i>        | SBB-0591         | JF713118 |
| <i>Dendrobium nobile</i>        | ST-ET 1990       | KF143493 |
| <i>Dendrobium nobile</i>        | SET-ET 1143      | KF143494 |
| <i>Dendrobium nobile</i>        | KL2761           | KJ210484 |
| <i>Dendrobium nobile</i>        | Jin X.H. 10759   | KJ210485 |
| <i>Dendrobium nobile</i>        | Jin X.H.093      | KJ210486 |
| <i>Dendrobium nothofagicola</i> | ORG 3600         | AY239986 |
| <i>Dendrobium nutantiflorum</i> | SBB-0032         | HM054718 |
| <i>Dendrobium nutantiflorum</i> | SBB-1046         | JF713119 |
| <i>Dendrobium nutantiflorum</i> | SBB-1047         | JF713120 |
| <i>Dendrobium ochreatum</i>     | SBB-0505         | HM054719 |
| <i>Dendrobium ochreatum</i>     | SBB-0506         | HM054720 |
| <i>Dendrobium ochreatum</i>     | SBB-1017         | JF713121 |
| <i>Dendrobium officinale</i>    | Jin X-H s.n. 11  | KF143437 |
| <i>Dendrobium officinale</i>    | Jin X-H s.n. 12  | KF143438 |
| <i>Dendrobium officinale</i>    | Jin X-H s.n. 1   | KF143439 |
| <i>Dendrobium officinale</i>    | Jin X-H s.n. 2   | KF143440 |
| <i>Dendrobium officinale</i>    | XYD05005         | EF221848 |
| <i>Dendrobium officinale</i>    | XYD03009         | EF221849 |
| <i>Dendrobium officinale</i>    | 20000804         | EF221850 |
| <i>Dendrobium officinale</i>    | XYD04008         | EF221851 |
| <i>Dendrobium officinale</i>    | XYD04009         | EF221852 |
| <i>Dendrobium officinale</i>    | XYD04010         | EF221853 |
| <i>Dendrobium officinale</i>    | XYD05006         | EF221854 |
| <i>Dendrobium officinale</i>    | Shanghai-0205-01 | EU592018 |
| <i>Dendrobium officinale</i>    | PS2521MT01       | HQ114245 |



|                                  |                       |          |
|----------------------------------|-----------------------|----------|
| <i>Dendrobium officinale</i>     | Jin X.H.094           | KJ210487 |
| <i>Dendrobium officinale</i>     | Jin X.H.095           | KJ210488 |
| <i>Dendrobium ovatum</i>         | SBB-0001              | HM054721 |
| <i>Dendrobium ovatum</i>         | SBB-0002              | HM054722 |
| <i>Dendrobium ovatum</i>         | SBB-0417              | HM054723 |
| <i>Dendrobium ovatum</i>         | SBB-0418              | HM054724 |
| <i>Dendrobium ovatum</i>         | SBB-0419              | HM054725 |
| <i>Dendrobium ovatum</i>         | SBB-0420              | HM054726 |
| <i>Dendrobium ovatum</i>         | SBB-0421              | HM054727 |
| <i>Dendrobium ovatum</i>         | SBB-0422              | HM054728 |
| <i>Dendrobium ovatum</i>         | SBB-0423              | HM054729 |
| <i>Dendrobium ovatum</i>         | SBB-0424              | HM054730 |
| <i>Dendrobium ovatum</i>         | SBB-0425              | HM054731 |
| <i>Dendrobium ovatum</i>         | SBB-0426              | HM054732 |
| <i>Dendrobium ovatum</i>         | SBB-0004              | HM054733 |
| <i>Dendrobium ovatum</i>         | SBB-0005              | HM054734 |
| <i>Dendrobium papilio</i>        | Cootes(Clements 9202) | AY239987 |
| <i>Dendrobium parciflorum</i>    | PS2526MT01            | HQ114252 |
| <i>Dendrobium parciflorum</i>    | Hainan native H1      | JN388575 |
| <i>Dendrobium parciflorum</i>    | Jin X-H 10113         | KF143466 |
| <i>Dendrobium parishii</i>       | NCHU-D89331201-1012   | HM590378 |
| <i>Dendrobium parishii</i>       | SBB-0527              | HM054735 |
| <i>Dendrobium parishii</i>       | SBB-0528              | HM054736 |
| <i>Dendrobium parishii</i>       | SBB-0997              | JF713122 |
| <i>Dendrobium parishii</i>       | TBG<JPN>:159443       | AB593630 |
| <i>Dendrobium peguanum</i>       | SBB-0319              | HM054737 |
| <i>Dendrobium peguanum</i>       | SBB-0397              | HM054738 |
| <i>Dendrobium peguanum</i>       | SBB-0398              | HM054739 |
| <i>Dendrobium peguanum</i>       | SBB-0399              | HM054740 |
| <i>Dendrobium peguanum</i>       | SBB-0400              | HM054741 |
| <i>Dendrobium peguanum</i>       | SBB-0401              | HM054742 |
| <i>Dendrobium peguanum</i>       | SBB-0402              | HM054743 |
| <i>Dendrobium peguanum</i>       | SBB-0404              | HM054744 |
| <i>Dendrobium peguanum</i>       | SBB-0405              | HM054745 |
| <i>Dendrobium peguanum</i>       | SBB-0406              | HM054746 |
| <i>Dendrobium pendulum</i>       | ICMdpn2103-1          | AY485712 |
| <i>Dendrobium pendulum</i>       | ZJ-0312-1             | DQ058791 |
| <i>Dendrobium pendulum</i>       | PS2511MT01            | HQ114234 |
| <i>Dendrobium pendulum</i>       | Yunnan native P1      | JN388596 |
| <i>Dendrobium pendulum</i>       | Jin X-H s.n. 6        | KF143496 |
| <i>Dendrobium pendulum</i>       | Jin X-H s.n. 7        | KF143497 |
| <i>Dendrobium pendulum</i>       | Jin X-H 8064          | KF143498 |
| <i>Dendrobium philippinense</i>  | ORG 1499              | AY239988 |
| <i>Dendrobium porphyrochilum</i> | Jin X-H 7033          | KF143500 |
| <i>Dendrobium porphyrochilum</i> | Jin X-H 11880         | KF143501 |
| <i>Dendrobium porphyrochilum</i> | Jin X.H.096           | KJ210489 |
| <i>Dendrobium porphyrochilum</i> | Jin X.H. 9082         | KJ210490 |
| <i>Dendrobium porphyrochilum</i> | Jin X.H. 11880-2      | KJ210491 |
| <i>Dendrobium primulinum</i>     | SBB-0170              | HM054747 |
| <i>Dendrobium primulinum</i>     | SBB-0171              | HM054748 |
| <i>Dendrobium primulinum</i>     | SBB-0224              | HM054749 |
| <i>Dendrobium primulinum</i>     | SBB-0225              | HM054750 |
| <i>Dendrobium primulinum</i>     | SBB-0238              | HM054751 |
| <i>Dendrobium primulinum</i>     | SBB-0273              | HM054752 |

|                                                |                          |          |
|------------------------------------------------|--------------------------|----------|
| <i>Dendrobium primulinum</i>                   | SBB-0274                 | HM054753 |
| <i>Dendrobium primulinum</i>                   | SBB-0276                 | HM054754 |
| <i>Dendrobium primulinum</i>                   | SBB-0277                 | HM054755 |
| <i>Dendrobium primulinum</i>                   | SBB-0278                 | HM054756 |
| <i>Dendrobium primulinum</i>                   | SBB-0533                 | HM054757 |
| <i>Dendrobium primulinum</i>                   | PS2518MT01               | HQ114242 |
| <i>Dendrobium primulinum</i>                   | SBB-0994                 | JF713123 |
| <i>Dendrobium primulinum</i>                   | Yunnan native P2-2       | JN388598 |
| <i>Dendrobium primulinum</i>                   | Jin X-H 10793            | KF143499 |
| <i>Dendrobium pseudotenellum</i>               | Jin X-H 13500            | KF143502 |
| <i>Dendrobium pulchellum</i>                   | Jin X-H 11878            | KF143503 |
| <i>Dendrobium quadrangulare</i>                | ORG 1277 (s#3500)        | AY239989 |
| <i>Dendrobium racemosum</i>                    | JMB18                    | EU430389 |
| <i>Dendrobium rhododioides</i>                 | ORG 3601                 | AY239991 |
| <i>Dendrobium ruckeri</i>                      | Kurzweil H & Lwin S 2536 | KF143504 |
| <i>Dendrobium ruckeri</i>                      | Kurzweil H & Lwin S 2545 | KF143505 |
| <i>Dendrobium salaccense</i>                   | PS2534MT01               | HQ114260 |
| <i>Dendrobium salaccense</i>                   | Hainan native S1         | JN388577 |
| <i>Dendrobium salaccense</i>                   | Jin X-H 9284             | KF143506 |
| <i>Dendrobium salaccense</i>                   | Jin X-H 7760             | KF143507 |
| <i>Dendrobium salaccense</i>                   | Jin X.H. 9284A           | KJ210493 |
| <i>Dendrobium salaccense</i>                   | Jin X.H.097              | KJ210495 |
| <i>Dendrobium sanguinolentum</i>               | Vaughn s.n.              | AY239992 |
| <i>Dendrobium scoriarum</i>                    | Jin X-H 13569            | KF143508 |
| <i>Dendrobium secundum</i>                     | Clements 5377            | AY239993 |
| <i>Dendrobium senile</i>                       | Jin X-H s.n. 8           | KF143509 |
| <i>Dendrobium serratilabium</i>                | Cootes & L.O.Williams    | AY239994 |
| <i>Dendrobium sinense</i>                      | Hainan native S2         | JN388578 |
| <i>Dendrobium sinense</i>                      | Jin X-H 10131            | KF143510 |
| <i>Dendrobium sinense</i>                      | Jin X-H 9328             | KF143511 |
| <i>Dendrobium sinense</i>                      | Jin X.H.098              | KJ210496 |
| <i>Dendrobium sinense</i>                      | Jin X.H. 10131-6         | KJ210497 |
| <i>Dendrobium sinense</i>                      | Jin X.H.99               | KJ210498 |
| <i>Dendrobium sinuatum</i>                     | ORG 3615                 | AY239995 |
| <i>Dendrobium smillieae</i>                    | Jones 8795               | AY239996 |
| <i>Dendrobium somai</i>                        | NCHU-D89331201-1014      | HM590380 |
| <i>Dendrobium speciosum</i>                    | Clements 5058            | AY239998 |
| <i>Dendrobium speciosum var. blackdownense</i> | JMB147                   | EU430391 |
| <i>Dendrobium speciosum var. boreale</i>       | JMB149                   | EU430392 |
| <i>Dendrobium speciosum var. boreale</i>       | JMB236                   | KC811531 |
| <i>Dendrobium speciosum var. boreale</i>       | JMB234                   | KC811532 |
| <i>Dendrobium speciosum var. boreale</i>       | JMB237                   | KC811534 |
| <i>Dendrobium speciosum var. boreale</i>       | JMB258                   | KC811538 |
| <i>Dendrobium speciosum var. boreale</i>       | JMB280                   | KC811539 |
| <i>Dendrobium speciosum var. boreale</i>       | JMB257                   | KC811541 |
| <i>Dendrobium speciosum var. boreale</i>       | JMB259                   | KC811542 |
| <i>Dendrobium speciosum var. capricornicum</i> | JMB148                   | EU430393 |
| <i>Dendrobium speciosum var. capricornicum</i> | JMB279                   | KC811543 |
| <i>Dendrobium speciosum var. capricornicum</i> | JMB282                   | KC811544 |
| <i>Dendrobium speciosum var. capricornicum</i> | JMB281                   | KC811545 |
| <i>Dendrobium speciosum var. carnarvonense</i> | JMB146                   | EU430394 |
| <i>Dendrobium speciosum var. curvicaule</i>    | JMB142                   | EU430395 |
| <i>Dendrobium speciosum var. curvicaule</i>    | JMB235                   | KC811533 |
| <i>Dendrobium speciosum var. curvicaule</i>    | JMB239                   | KC811535 |

|                                                          |                       |          |
|----------------------------------------------------------|-----------------------|----------|
| <i>Dendrobium speciosum</i> var. <i>grandiflorum</i>     | JMB141                | EU430396 |
| <i>Dendrobium speciosum</i> var. <i>hillii</i>           | JMB140                | EU430397 |
| <i>Dendrobium speciosum</i> var. <i>pedunculatum</i>     | JMB166                | EU430398 |
| <i>Dendrobium speciosum</i> var. <i>pedunculatum</i>     | JMB267                | KC811536 |
| <i>Dendrobium speciosum</i> var. <i>pedunculatum</i>     | JMB243                | KC811537 |
| <i>Dendrobium speciosum</i> var. <i>pedunculatum</i>     | JMB242                | KC811540 |
| <i>Dendrobium speciosum</i> var. <i>speciosum</i>        | JMB139                | EU430399 |
| <i>Dendrobium strongylanthum</i>                         | SC-SM0311-1           | DQ058797 |
| <i>Dendrobium strongylanthum</i>                         | Jin X.H. 8532         | KJ210499 |
| <i>Dendrobium strongylanthum</i>                         | Jin X.H. 10106        | KJ210500 |
| <i>Dendrobium strongylanthum</i>                         | Jin X.H. 11659        | KJ210501 |
| <i>Dendrobium strongylanthum</i>                         | Jin X.H. 11659-B      | KJ210502 |
| <i>Dendrobium stuartii</i>                               | Roberts s.n.          | AY239999 |
| <i>Dendrobium stuposum</i>                               | PS2514MT01            | HQ114237 |
| <i>Dendrobium stuposum</i>                               | Yunnan native S1      | JN388599 |
| <i>Dendrobium stuposum</i>                               | Jin X-H 7027          | KF143516 |
| <i>Dendrobium subuliferum</i>                            | Clements 9523         | AY240000 |
| <i>Dendrobium sulcatum</i>                               | Jin X-H 11879         | KF143517 |
| <i>Dendrobium terminale</i>                              | DY-ML03-1             | DQ058801 |
| <i>Dendrobium tetragonum</i> var. <i>cacatua</i>         | JMB23                 | EU430400 |
| <i>Dendrobium tetragonum</i> var. <i>cataractarum</i>    | JMB283                | KC811551 |
| <i>Dendrobium tetragonum</i> var. <i>giganteum</i>       | JMB42                 | EU430401 |
| <i>Dendrobium tetragonum</i> var. <i>giganteum</i>       | JMB254                | KC811546 |
| <i>Dendrobium tetragonum</i> var. <i>giganteum</i>       | JMB252                | KC811547 |
| <i>Dendrobium tetragonum</i> var. <i>giganteum</i>       | JMB276                | KC811548 |
| <i>Dendrobium tetragonum</i> var. <i>giganteum</i>       | JMB256                | KC811549 |
| <i>Dendrobium tetragonum</i> var. <i>melaleucaphilum</i> | JMB48                 | EU430402 |
| <i>Dendrobium tetragonum</i> var. <i>serpentis</i>       | JMB61                 | KC811550 |
| <i>Dendrobium tetragonum</i> var. <i>tetragonum</i>      | JMB69                 | EU430403 |
| <i>Dendrobium tetragonum</i> var. <i>tetragonum</i>      | JMB284                | KC811552 |
| <i>Dendrobium thyrsoiflorum</i>                          | Clements 5163         | AY240001 |
| <i>Dendrobium thyrsoiflorum</i>                          | Yun-99011             | AF362032 |
| <i>Dendrobium thyrsoiflorum</i>                          | SBB-0518              | HM054758 |
| <i>Dendrobium thyrsoiflorum</i>                          | SBB-0519              | HM054759 |
| <i>Dendrobium thyrsoiflorum</i>                          | SBB-0520              | HM054760 |
| <i>Dendrobium thyrsoiflorum</i>                          | PS2505MT01            | HQ114227 |
| <i>Dendrobium thyrsoiflorum</i>                          | Jin X-H 10755         | KF143519 |
| <i>Dendrobium thyrsoiflorum</i>                          | Jin X.H. 10783        | KJ210503 |
| <i>Dendrobium thyrsoiflorum</i>                          | Jin X.H.100           | KJ210504 |
| <i>Dendrobium tosaense</i>                               | CMC DT 0303           | EU003113 |
| <i>Dendrobium tosaense</i>                               | NCHU-D89331201-1001   | HM590367 |
| <i>Dendrobium transparens</i>                            | Jin X-H 11046         | KF143520 |
| <i>Dendrobium trigonopus</i>                             | CG-NB-0401            | DQ058793 |
| <i>Dendrobium trigonopus</i>                             | CG-031010             | DQ058794 |
| <i>Dendrobium trigonopus</i>                             | CG-ML-0401            | DQ058795 |
| <i>Dendrobium trigonopus</i>                             | PS2506MT01            | HQ114228 |
| <i>Dendrobium trigonopus</i>                             | Jin X-H 10750         | KF143521 |
| <i>Dendrobium trigonopus</i>                             | Jin X-H 10718         | KF143522 |
| <i>Dendrobium trigonopus</i>                             | Jin X.H. 10756        | KJ210505 |
| <i>Dendrobium truncatum</i>                              | Vaughn(Clements 5806) | AY240002 |
| <i>Dendrobium unicum</i>                                 | Jin X-H 13541         | KF143523 |
| <i>Dendrobium usterioides</i>                            | ORG 3000              | AY240003 |
| <i>Dendrobium victoriaereginae</i>                       | Cootes (ORG 1484)     | AY240004 |
| <i>Dendrobium victoriaereginae</i>                       | CMU DVR 0823          | EU840694 |



|                                |                    |          |
|--------------------------------|--------------------|----------|
| <i>Dendrobium violaceum</i>    | ORG 3597           | AY240005 |
| <i>Dendrobium wangliangii</i>  | Hu G-W 24479       | KF143524 |
| <i>Dendrobium wangliangii</i>  | Jin X.H.101        | KJ210506 |
| <i>Dendrobium wangliangii</i>  | Jin X.H.102        | KJ210507 |
| <i>Dendrobium wardianum</i>    | DBQ-JL04-01        | DQ058789 |
| <i>Dendrobium wardianum</i>    | PS2509MT01         | HQ114231 |
| <i>Dendrobium wardianum</i>    | PS2509MT02         | HQ114232 |
| <i>Dendrobium wardianum</i>    | SBB-0998           | JF713124 |
| <i>Dendrobium wardianum</i>    | TBG<JPN>:126641    | AB593686 |
| <i>Dendrobium wardianum</i>    | Yunnan native W1   | JN388600 |
| <i>Dendrobium wattii</i>       | Jin X-H 11817      | KF143525 |
| <i>Dendrobium williamsonii</i> | PS2503MT01         | HQ114225 |
| <i>Dendrobium williamsonii</i> | Jin X.H.103        | KJ210508 |
| <i>Dendrobium williamsonii</i> | Jin X.H. 10754     | KJ210509 |
| <i>Dendrobium williamsonii</i> | Jin X.H.104        | KJ210510 |
| <i>Dendrobium williamsonii</i> | Jin X.H. 10754-2   | KJ210511 |
| <i>Dendrobium williamsonii</i> | Jin X.H.105        | KJ210513 |
| <i>Dendrobium wilsonii</i>     | Jin X-H 9778       | KF143526 |
| <i>Dendrobium xichouense</i>   | Jin X-H s.n. 14    | KF143527 |
| <i>Dendrobium xichouense</i>   | Jin X.H.106        | KJ210514 |
| <i>Dendrobium yeageri</i>      | ORG 3580           | AY240006 |
| <i>Liparis kumokiri</i>        | Tsutsumi L16 (TNS) | AB289473 |

**Taxon (*matK*)**

*Dendrobium acinaciforme*  
*Dendrobium acinaciforme*  
*Dendrobium acinaciforme*  
*Dendrobium aduncum*  
*Dendrobium aduncum*  
*Dendrobium aduncum*  
*Dendrobium aduncum*  
*Dendrobium aggregatum*  
*Dendrobium aloifolium*  
*Dendrobium amoenum*  
*Dendrobium anceps*  
*Dendrobium anceps*  
*Dendrobium anceps*  
*Dendrobium aphyllum*  
*Dendrobium aphyllum*  
*Dendrobium aphyllum*  
*Dendrobium aphyllum*  
*Dendrobium aphyllum*

**Voucher**

JYSH-SH  
Jin X-H 10742  
Jin X-H 7757  
JH32-SH  
SBB-0309  
Jin X-H 9522  
Jin X.H.061  
Jin X-H s.n. 10  
WY 193  
SBB-0135  
SBB-0137  
SBB-0138  
SBB-0139  
SBB-0140  
SBB-0141  
SBB-0142  
SBB-0247  
SBB-0248  
SBB-0249  
SBB-0029  
SBB-0575  
SBB-0576  
SBB-0119  
SBB-0301  
SBB-0548  
SBB-0288  
SBB-0306  
SBB-0536  
SBB-0551  
SBB-0552

***matK***

FJ216666  
KF143721  
KF143722  
FJ216659  
HM055147  
KF143427  
KJ187310  
KF143639  
KC682481  
HM055148  
HM055149  
HM055150  
HM055151  
HM055152  
HM055153  
HM055154  
HM055155  
HM055156  
HM055157  
HM055158  
HM055159  
HM055160  
HM055161  
JF713383  
JF713384  
HM055163  
HM055164  
HM055165  
HM055166  
HM055167

|                               |                |          |
|-------------------------------|----------------|----------|
| <i>Dendrobium aphyllum</i>    | SBB-0553       | HM055168 |
| <i>Dendrobium aphyllum</i>    | SBB-0561       | HM055169 |
| <i>Dendrobium aphyllum</i>    | SBB-0595       | HM055170 |
| <i>Dendrobium aphyllum</i>    | SBB-0596       | HM055171 |
| <i>Dendrobium aphyllum</i>    | SBB-0597       | HM055172 |
| <i>Dendrobium aphyllum</i>    | SBB-0598       | HM055173 |
| <i>Dendrobium aphyllum</i>    | SBB-0599       | HM055174 |
| <i>Dendrobium aphyllum</i>    | SBB-0600       | HM055175 |
| <i>Dendrobium aphyllum</i>    | SBB-0628       | HM055176 |
| <i>Dendrobium aphyllum</i>    | Jin X-H 10798  | KF143640 |
| <i>Dendrobium aqueum</i>      | SBB-0303       | HM055177 |
| <i>Dendrobium aqueum</i>      | SBB-0359       | HM055178 |
| <i>Dendrobium aqueum</i>      | SBB-0360       | HM055179 |
| <i>Dendrobium aqueum</i>      | SBB-0361       | HM055180 |
| <i>Dendrobium aqueum</i>      | SBB-0362       | HM055181 |
| <i>Dendrobium aqueum</i>      | SBB-0363       | HM055182 |
| <i>Dendrobium aqueum</i>      | SBB-0365       | HM055183 |
| <i>Dendrobium aqueum</i>      | SBB-0366       | HM055184 |
| <i>Dendrobium aqueum</i>      | SBB-0367       | HM055185 |
| <i>Dendrobium aqueum</i>      | SBB-0382       | HM055186 |
| <i>Dendrobium aqueum</i>      | SBB-1051       | JF713385 |
| <i>Dendrobium aqueum</i>      | SBB-0030       | JF713386 |
| <i>Dendrobium aqueum</i>      | SBB-0364       | JF713387 |
| <i>Dendrobium barbatulum</i>  | SBB-0409       | HM055187 |
| <i>Dendrobium barbatulum</i>  | SBB-0410       | HM055188 |
| <i>Dendrobium barbatulum</i>  | SBB-0411       | HM055189 |
| <i>Dendrobium barbatulum</i>  | SBB-0412       | HM055190 |
| <i>Dendrobium barbatulum</i>  | SBB-0413       | HM055191 |
| <i>Dendrobium barbatulum</i>  | SBB-0414       | HM055192 |
| <i>Dendrobium barbatulum</i>  | SBB-0415       | HM055193 |
| <i>Dendrobium barbatulum</i>  | SBB-0416       | HM055194 |
| <i>Dendrobium barbatulum</i>  | SBB-0407       | JF713388 |
| <i>Dendrobium barbatulum</i>  | SBB-0408       | JF713389 |
| <i>Dendrobium bellatulum</i>  | Jin X-H 5699   | KF143641 |
| <i>Dendrobium bensoniae</i>   | SBB-0544       | HM055195 |
| <i>Dendrobium bensoniae</i>   | SBB-0543       | JF713390 |
| <i>Dendrobium bicameratum</i> | SBB-0213       | HM055196 |
| <i>Dendrobium bicameratum</i> | SBB-0215       | HM055197 |
| <i>Dendrobium bicameratum</i> | SBB-0216       | HM055198 |
| <i>Dendrobium bicameratum</i> | SBB-0217       | HM055199 |
| <i>Dendrobium bicameratum</i> | SBB-0221       | HM055200 |
| <i>Dendrobium bicameratum</i> | SBB-0222       | HM055201 |
| <i>Dendrobium bicameratum</i> | SBB-0223       | HM055202 |
| <i>Dendrobium bicameratum</i> | SBB-0226       | HM055203 |
| <i>Dendrobium bicameratum</i> | SBB-0228       | HM055204 |
| <i>Dendrobium bicameratum</i> | SBB-0239       | HM055205 |
| <i>Dendrobium bicameratum</i> | SBB-0028       | HM055206 |
| <i>Dendrobium brymerianum</i> | JH13-SH        | FJ216640 |
| <i>Dendrobium brymerianum</i> | Jin X-H 10782  | KF143642 |
| <i>Dendrobium brymerianum</i> | Jin X.H.066    | KJ187311 |
| <i>Dendrobium brymerianum</i> | Jin X.H. 11044 | KJ187312 |
| <i>Dendrobium capillipes</i>  | JH02-SH        | FJ216630 |
| <i>Dendrobium capillipes</i>  | Jin X-H 10757  | KF143643 |
| <i>Dendrobium cariniferum</i> | Jin X-H 13012  | KF143644 |

|                                |                         |                 |
|--------------------------------|-------------------------|-----------------|
| <i>Dendrobium cariniferum</i>  | Jin X-H 10754           | KF143645        |
| <i>Dendrobium cariniferum</i>  | Jin X-H 11024           | KF143646        |
| <i>Dendrobium christyanum</i>  | Jin X-H 11045           | KF143651        |
| <i>Dendrobium christyanum</i>  | Jin X-H s.n. 3          | KF143652        |
| <i>Dendrobium chrysanthum</i>  | SBB-0503                | HM055207        |
| <i>Dendrobium chrysanthum</i>  | SBB-0563                | HM055208        |
| <i>Dendrobium chrysanthum</i>  | SBB-0583                | HM055209        |
| <i>Dendrobium chrysanthum</i>  | SBB-0617                | HM055210        |
| <i>Dendrobium chrysanthum</i>  | SBB-0618                | HM055211        |
| <i>Dendrobium chrysanthum</i>  | SBB-0620                | HM055212        |
| <i>Dendrobium chrysanthum</i>  | SBB-1010                | JF713391        |
| <i>Dendrobium chrysanthum</i>  | SBB-0504                | JF713392        |
| <i>Dendrobium chrysanthum</i>  | SBB-0619                | JF713393        |
| <i>Dendrobium chrysanthum</i>  | SBB-0621                | JF713394        |
| <i>Dendrobium chrysanthum</i>  | SBB-0622                | JF713395        |
| <i>Dendrobium chrysanthum</i>  | SBB-0992                | JF713396        |
| <i>Dendrobium chrysanthum</i>  | Jin X-H 11430           | KF143653        |
| <i>Dendrobium chrysanthum</i>  | SET-ET 1186             | <b>KJ187313</b> |
| <i>Dendrobium chrysanthum</i>  | SET-ET 1274             | <b>KJ187314</b> |
| <i>Dendrobium chrysotoxum</i>  | JH01-SH                 | FJ216629        |
| <i>Dendrobium chrysotoxum</i>  | JHGC-SH                 | FJ216664        |
| <i>Dendrobium chrysotoxum</i>  | SMGC-SH                 | FJ216671        |
| <i>Dendrobium chrysotoxum</i>  | SBB-0517                | HM055213        |
| <i>Dendrobium chrysotoxum</i>  | SBB-0515                | JF713397        |
| <i>Dendrobium chrysotoxum</i>  | SBB-0516                | JF713398        |
| <i>Dendrobium chrysotoxum</i>  | Jin X-H 10731           | KF143654        |
| <i>Dendrobium compactum</i>    | Jin X-H 11849           | KF143655        |
| <i>Dendrobium crepidatum</i>   | SBB-0056                | HM055225        |
| <i>Dendrobium crepidatum</i>   | SBB-0057                | HM055226        |
| <i>Dendrobium crepidatum</i>   | SBB-0059                | HM055227        |
| <i>Dendrobium crepidatum</i>   | SBB-0061                | HM055228        |
| <i>Dendrobium crepidatum</i>   | SBB-0062                | HM055229        |
| <i>Dendrobium crepidatum</i>   | SBB-0063                | HM055230        |
| <i>Dendrobium crepidatum</i>   | SBB-0064                | HM055231        |
| <i>Dendrobium crepidatum</i>   | SBB-0067                | HM055232        |
| <i>Dendrobium crepidatum</i>   | SBB-0069                | HM055233        |
| <i>Dendrobium crepidatum</i>   | SBB-0070                | HM055234        |
| <i>Dendrobium crepidatum</i>   | Jin X-H 10843           | KF143656        |
| <i>Dendrobium crepidatum</i>   | Jin X.H.069             | <b>KJ187315</b> |
| <i>Dendrobium crepidatum</i>   | Jin X.H.070             | <b>KJ187316</b> |
| <i>Dendrobium crepidatum</i>   | Jin X.H.072             | <b>KJ187317</b> |
| <i>Dendrobium crepidatum</i>   | Jin X.H.071             | <b>KJ187318</b> |
| <i>Dendrobium crumenatum</i>   | SBB-0124                | HM055235        |
| <i>Dendrobium crumenatum</i>   | SBB-0291                | JF713399        |
| <i>Dendrobium crumenatum</i>   | SBB-0316                | JF713400        |
| <i>Dendrobium crumenatum</i>   | D008/M.M.1              | KC682479        |
| <i>Dendrobium crystallinum</i> | JH23-SH                 | FJ216650        |
| <i>Dendrobium crystallinum</i> | Jin X-H 11031           | KF143657        |
| <i>Dendrobium crystallinum</i> | Jin X.H. 6959           | <b>KJ187319</b> |
| <i>Dendrobium denneanum</i>    | Jin X.H. 11011          | <b>KJ187320</b> |
| <i>Dendrobium denneanum</i>    | Jin X-H 10899           | KF143658        |
| <i>Dendrobium denneanum</i>    | Jin X-H 10840           | KF143659        |
| <i>Dendrobium denneanum</i>    | Jin X-H & Lai Y-J 11011 | KF143660        |
| <i>Dendrobium densiflorum</i>  | JH28-SH                 | FJ216655        |

|                                    |                 |          |
|------------------------------------|-----------------|----------|
| <i>Dendrobium densiflorum</i>      | MHSH-SH         | FJ216668 |
| <i>Dendrobium densiflorum</i>      | strain M16      | FJ794056 |
| <i>Dendrobium densiflorum</i>      | SBB-0120        | HM055236 |
| <i>Dendrobium densiflorum</i>      | SBB-0027        | HM055237 |
| <i>Dendrobium densiflorum</i>      | SBB-0547        | HM055238 |
| <i>Dendrobium densiflorum</i>      | SBB-1001        | JF713401 |
| <i>Dendrobium densiflorum</i>      | SBB-1015        | JF713402 |
| <i>Dendrobium densiflorum</i>      | SET-ET 1272     | KF143661 |
| <i>Dendrobium denudans</i>         | Jin X-H 8510    | KF143662 |
| <i>Dendrobium devonianum</i>       | JH25-SH         | FJ216652 |
| <i>Dendrobium devonianum</i>       | SBB-1011        | JF713403 |
| <i>Dendrobium devonianum</i>       | SBB-0513        | JF713404 |
| <i>Dendrobium devonianum</i>       | SBB-0514        | JF713405 |
| <i>Dendrobium devonianum</i>       | Jin X-H 10302   | KF143663 |
| <i>Dendrobium devonianum</i>       | Jin X.H. 9902   | KJ187321 |
| <i>Dendrobium devonianum</i>       | Jin X.H. 11030  | KJ187322 |
| <i>Dendrobium devonianum</i>       | Jin X.H. 6947   | KJ187323 |
| <i>Dendrobium dixanthum</i>        | Jin X-H 13017   | KF143664 |
| <i>Dendrobium dixanthum</i>        | Jin X.H.107     | KJ187324 |
| <i>Dendrobium draconis</i>         | SBB-0545        | JF713406 |
| <i>Dendrobium draconis</i>         | SBB-0546        | JF713407 |
| <i>Dendrobium ellipsophyllum</i>   | Jin X-H 13066   | KF143665 |
| <i>Dendrobium exile</i>            | Jin X-H 10776   | KF143666 |
| <i>Dendrobium exile</i>            | Jin X-H 10780   | KF143667 |
| <i>Dendrobium falconeri</i>        | JH20-SH         | FJ216647 |
| <i>Dendrobium falconeri</i>        | SBB-1013        | JF713408 |
| <i>Dendrobium falconeri</i>        | Jin X-H 8200    | KF143668 |
| <i>Dendrobium falconeri</i>        | Jin X.H.077     | KJ187325 |
| <i>Dendrobium falconeri</i>        | Jin X.H. 8977   | KJ187326 |
| <i>Dendrobium fanjingshanense</i>  | Jin X-H 10102   | KF143669 |
| <i>Dendrobium fanjingshanense</i>  | Jin X-H s.n. 13 | KF143670 |
| <i>Dendrobium fanjingshanense</i>  | Jin X.H.108     | KJ187327 |
| <i>Dendrobium fanjingshanense</i>  | Jin X.H.078     | KJ187328 |
| <i>Dendrobium fanjingshanense</i>  | Jin X.H.079     | KJ187329 |
| <i>Dendrobium farmeri</i>          | SBB-0538        | HM055239 |
| <i>Dendrobium farmeri</i>          | SBB-0549        | HM055240 |
| <i>Dendrobium farmeri</i>          | SBB-0537        | JF713409 |
| <i>Dendrobium fimbriatum</i>       | JH08-SH         | FJ216635 |
| <i>Dendrobium fimbriatum</i>       | SBB-0115        | HM055241 |
| <i>Dendrobium fimbriatum</i>       | SBB-0025        | HM055242 |
| <i>Dendrobium fimbriatum</i>       | SBB-0304        | HM055243 |
| <i>Dendrobium fimbriatum</i>       | SBB-0323        | HM055244 |
| <i>Dendrobium fimbriatum</i>       | SBB-0507        | HM055245 |
| <i>Dendrobium fimbriatum</i>       | SBB-0508        | JF713410 |
| <i>Dendrobium fimbriatum</i>       | SBB-0510        | JF713411 |
| <i>Dendrobium fimbriatum</i>       | SBB-0562        | JF713412 |
| <i>Dendrobium fimbriatum</i>       | Jin X-H s.n. 16 | KF143671 |
| <i>Dendrobium findleyanum</i>      | JH17-SH         | FJ216644 |
| <i>Dendrobium findleyanum</i>      | Jin X-H 11875   | KF143672 |
| <i>Dendrobium goldschmidtianum</i> | Chung S-W 12001 | KF143673 |
| <i>Dendrobium grande</i>           | RG 2746         | KC682482 |
| <i>Dendrobium gratiosissimum</i>   | JH16-SH         | FJ216643 |
| <i>Dendrobium gratiosissimum</i>   | Jin X-H 10781   | KF143674 |
| <i>Dendrobium gratiosissimum</i>   | Jin X-H 10758   | KF143675 |

|                                  |                 |                 |
|----------------------------------|-----------------|-----------------|
| <i>Dendrobium haemoglossimum</i> | SBB-0114        | HM055246        |
| <i>Dendrobium haemoglossimum</i> | SBB-0031        | HM055247        |
| <i>Dendrobium haemoglossimum</i> | SBB-0289        | JF713413        |
| <i>Dendrobium haemoglossimum</i> | SBB-0317        | JF713414        |
| <i>Dendrobium hancockii</i>      | JH29-SH         | FJ216656        |
| <i>Dendrobium hancockii</i>      | Jin X-H 13492   | KF143677        |
| <i>Dendrobium hancockii</i>      | Jin X.H.109     | <b>KJ187330</b> |
| <i>Dendrobium harveyanum</i>     | JH05-SH         | FJ216633        |
| <i>Dendrobium harveyanum</i>     | Jin X-H 10760   | KF143678        |
| <i>Dendrobium harveyanum</i>     | Jin X.H.10703   | <b>KJ187331</b> |
| <i>Dendrobium henanense</i>      | Jin X-H 9772    | KF143679        |
| <i>Dendrobium henanense</i>      | Jin X.H.9235    | <b>KJ187332</b> |
| <i>Dendrobium henryi</i>         | YN-ET 990       | KF143680        |
| <i>Dendrobium henryi</i>         | Jin X.H.11048   | <b>KJ187335</b> |
| <i>Dendrobium henryi</i>         | Jin X.H.11822   | <b>KJ187336</b> |
| <i>Dendrobium herbaceum</i>      | SBB-0038        | HM055254        |
| <i>Dendrobium herbaceum</i>      | SBB-0039        | HM055255        |
| <i>Dendrobium herbaceum</i>      | SBB-0041        | HM055256        |
| <i>Dendrobium herbaceum</i>      | SBB-0042        | HM055257        |
| <i>Dendrobium herbaceum</i>      | SBB-0043        | HM055258        |
| <i>Dendrobium herbaceum</i>      | SBB-0045        | HM055259        |
| <i>Dendrobium herbaceum</i>      | SBB-0046        | HM055260        |
| <i>Dendrobium herbaceum</i>      | SBB-0050        | HM055261        |
| <i>Dendrobium herbaceum</i>      | SBB-0051        | HM055262        |
| <i>Dendrobium herbaceum</i>      | SBB-0052        | HM055263        |
| <i>Dendrobium herbaceum</i>      | SBB-0053        | HM055264        |
| <i>Dendrobium herbaceum</i>      | SBB-0006        | HM055265        |
| <i>Dendrobium herbaceum</i>      | SBB-0093        | HM055266        |
| <i>Dendrobium herbaceum</i>      | SBB-0094        | HM055267        |
| <i>Dendrobium herbaceum</i>      | SBB-0095        | HM055268        |
| <i>Dendrobium hercoglossum</i>   | Jin X-H 10109   | KF143681        |
| <i>Dendrobium hercoglossum</i>   | Jin X-H s.n. 17 | KF143682        |
| <i>Dendrobium heterocarpum</i>   | JH15-SH         | FJ216642        |
| <i>Dendrobium heterocarpum</i>   | SBB-0502        | HM055269        |
| <i>Dendrobium heterocarpum</i>   | SBB-1008        | JF713415        |
| <i>Dendrobium heterocarpum</i>   | SBB-0993        | JF713416        |
| <i>Dendrobium heterocarpum</i>   | Jin X-H 12014   | KF143683        |
| <i>Dendrobium hookerianum</i>    | SET-ET 1137     | KF143684        |
| <i>Dendrobium hookerianum</i>    | Jin X-H 10367   | KF143685        |
| <i>Dendrobium hookerianum</i>    | Jin X.H. 9102   | <b>KJ187338</b> |
| <i>Dendrobium huoshanense</i>    | Jin X-H 9768    | KF143686        |
| <i>Dendrobium hymenanthum</i>    | RG 2154         | KC682487        |
| <i>Dendrobium infundibulum</i>   | SBB-0529        | HM055270        |
| <i>Dendrobium infundibulum</i>   | SBB-0530        | HM055271        |
| <i>Dendrobium infundibulum</i>   | SBB-0991        | JF713417        |
| <i>Dendrobium infundibulum</i>   | Jin X-H 11877   | KF143687        |
| <i>Dendrobium jenkinsii</i>      | SBB-0525        | HM055272        |
| <i>Dendrobium jenkinsii</i>      | SBB-1018        | JF713418        |
| <i>Dendrobium jenkinsii</i>      | SBB-0524        | JF713419        |
| <i>Dendrobium jenkinsii</i>      | SBB-0526        | JF713420        |
| <i>Dendrobium jenkinsii</i>      | Jin X-H 10709   | KF143688        |
| <i>Dendrobium jenkinsii</i>      | Jin X-H s.n. 4  | KF143689        |
| <i>Dendrobium kentrophyllum</i>  | FAN.FH.162      | KC682486        |
| <i>Dendrobium leonis</i>         | RG 2491         | KC682484        |



|                                 |                          |          |
|---------------------------------|--------------------------|----------|
| <i>Dendrobium lindleyi</i>      | SBB-0521                 | HM055273 |
| <i>Dendrobium lindleyi</i>      | SBB-0523                 | HM055274 |
| <i>Dendrobium lindleyi</i>      | SBB-0522                 | JF713421 |
| <i>Dendrobium lituiflorum</i>   | JH24-SH                  | FJ216651 |
| <i>Dendrobium loddigesii</i>    | JH35-SH                  | FJ216661 |
| <i>Dendrobium loddigesii</i>    | Jin X-H s.n. 15          | KF143690 |
| <i>Dendrobium lohohense</i>     | Jin X-H 9769             | KF143691 |
| <i>Dendrobium longicornu</i>    | SET-ET 1347              | KF143692 |
| <i>Dendrobium longicornu</i>    | Kurzweil H & Lwin S 2647 | KF143693 |
| <i>Dendrobium longicornu</i>    | Jin X-H 11663            | KF143694 |
| <i>Dendrobium macraei</i>       | SBB-0555                 | JN004416 |
| <i>Dendrobium macraei</i>       | SBB-0564                 | JN004417 |
| <i>Dendrobium macraei</i>       | SBB-0577                 | JN004418 |
| <i>Dendrobium macrostachyum</i> | SBB-0013                 | HM055286 |
| <i>Dendrobium macrostachyum</i> | SBB-0014                 | HM055287 |
| <i>Dendrobium macrostachyum</i> | SBB-0017                 | HM055288 |
| <i>Dendrobium macrostachyum</i> | SBB-0018                 | HM055289 |
| <i>Dendrobium macrostachyum</i> | SBB-0019                 | HM055290 |
| <i>Dendrobium macrostachyum</i> | SBB-0020                 | HM055291 |
| <i>Dendrobium macrostachyum</i> | SBB-0021                 | HM055292 |
| <i>Dendrobium macrostachyum</i> | SBB-0022                 | HM055293 |
| <i>Dendrobium macrostachyum</i> | SBB-0023                 | HM055294 |
| <i>Dendrobium macrostachyum</i> | SBB-0024                 | HM055295 |
| <i>Dendrobium macrostachyum</i> | SBB-0286                 | HM055296 |
| <i>Dendrobium macrostachyum</i> | SBB-0287                 | HM055297 |
| <i>Dendrobium macrostachyum</i> | SBB-0007                 | HM055298 |
| <i>Dendrobium macrostachyum</i> | SBB-0008                 | HM055299 |
| <i>Dendrobium macrostachyum</i> | SBB-0009                 | HM055300 |
| <i>Dendrobium menglaense</i>    | Jin X-H 10464            | KF143695 |
| <i>Dendrobium microbulbon</i>   | SBB-0334                 | HM055301 |
| <i>Dendrobium microbulbon</i>   | SBB-0335                 | HM055302 |
| <i>Dendrobium microbulbon</i>   | SBB-0337                 | HM055303 |
| <i>Dendrobium microbulbon</i>   | SBB-0338                 | HM055304 |
| <i>Dendrobium microbulbon</i>   | SBB-0339                 | HM055305 |
| <i>Dendrobium microbulbon</i>   | SBB-0340                 | HM055306 |
| <i>Dendrobium microbulbon</i>   | SBB-0341                 | HM055307 |
| <i>Dendrobium microbulbon</i>   | SBB-0342                 | HM055308 |
| <i>Dendrobium microbulbon</i>   | SBB-0333                 | JF713422 |
| <i>Dendrobium microbulbon</i>   | SBB-0336                 | JF713423 |
| <i>Dendrobium minutiflorum</i>  | Jin X-H 10468            | KF143696 |
| <i>Dendrobium minutiflorum</i>  | Jin X-H 6979             | KF143697 |
| <i>Dendrobium moniliforme</i>   | PDBK2007-0736            | KC704627 |
| <i>Dendrobium moniliforme</i>   | PDBK2007-0737            | KC704628 |
| <i>Dendrobium moniliforme</i>   | Jin X-H 8960             | KF143698 |
| <i>Dendrobium moniliforme</i>   | Jin X-H 8957             | KF143699 |
| <i>Dendrobium moniliforme</i>   | Jin X-H 10895            | KF143700 |
| <i>Dendrobium moniliforme</i>   | Jin X.H.087              | KJ187339 |
| <i>Dendrobium moniliforme</i>   | Jin X.H. 10080           | KJ187340 |
| <i>Dendrobium moniliforme</i>   | Jin X.H.088              | KJ187341 |
| <i>Dendrobium moniliforme</i>   | Jin X.H.089              | KJ187342 |
| <i>Dendrobium moniliforme</i>   | Jin X.H.090              | KJ187343 |
| <i>Dendrobium moniliforme</i>   | Jin X.H. 8999            | KJ187344 |
| <i>Dendrobium moniliforme</i>   | Jin X.H. 6976            | KJ187345 |
| <i>Dendrobium moniliforme</i>   | Jin X.H.091              | KJ187346 |

|                                 |                 |          |
|---------------------------------|-----------------|----------|
| <i>Dendrobium moniliforme</i>   | Jin X.H. 10921  | KJ187347 |
| <i>Dendrobium moniliforme</i>   | Jin X.H.092     | KJ187348 |
| <i>Dendrobium moschatum</i>     | SBB-0116        | HM055309 |
| <i>Dendrobium moschatum</i>     | SBB-0026        | HM055310 |
| <i>Dendrobium moschatum</i>     | SBB-0322        | HM055311 |
| <i>Dendrobium moschatum</i>     | SBB-0511        | HM055312 |
| <i>Dendrobium moschatum</i>     | SBB-0512        | HM055313 |
| <i>Dendrobium moschatum</i>     | SBB-0568        | HM055314 |
| <i>Dendrobium moschatum</i>     | SBB-0569        | HM055315 |
| <i>Dendrobium moschatum</i>     | SBB-0630        | HM055316 |
| <i>Dendrobium moschatum</i>     | SBB-1014        | JF713424 |
| <i>Dendrobium moschatum</i>     | SBB-0567        | JF713425 |
| <i>Dendrobium moschatum</i>     | Jin X-H 11886   | KF143701 |
| <i>Dendrobium nobile</i>        | JH09-SH         | FJ216636 |
| <i>Dendrobium nobile</i>        | JH30-SH         | FJ216657 |
| <i>Dendrobium nobile</i>        | JHJC-SH         | FJ216665 |
| <i>Dendrobium nobile</i>        | SMJC-SH         | FJ216672 |
| <i>Dendrobium nobile</i>        | SBB-0016        | HM055317 |
| <i>Dendrobium nobile</i>        | SBB-0325        | HM055318 |
| <i>Dendrobium nobile</i>        | SBB-0539        | HM055319 |
| <i>Dendrobium nobile</i>        | SBB-0541        | HM055320 |
| <i>Dendrobium nobile</i>        | SBB-0542        | HM055321 |
| <i>Dendrobium nobile</i>        | SBB-0540        | JF713426 |
| <i>Dendrobium nobile</i>        | ST-ET 1990      | KF143702 |
| <i>Dendrobium nobile</i>        | SET-ET 1143     | KF143703 |
| <i>Dendrobium nobile</i>        | KL2761          | KJ187349 |
| <i>Dendrobium nobile</i>        | Jin X.H. 10759  | KJ187350 |
| <i>Dendrobium nobile</i>        | Jin X.H.093     | KJ187351 |
| <i>Dendrobium nodosum</i>       | SBB-0298        | JN004419 |
| <i>Dendrobium nutantiflorum</i> | SBB-1046        | JF713427 |
| <i>Dendrobium nutantiflorum</i> | SBB-1047        | JF713428 |
| <i>Dendrobium nutantiflorum</i> | SBB-0032        | JF713429 |
| <i>Dendrobium ochreatum</i>     | SBB-0505        | HM055322 |
| <i>Dendrobium ochreatum</i>     | SBB-0506        | HM055323 |
| <i>Dendrobium ochreatum</i>     | SBB-1017        | JF713430 |
| <i>Dendrobium officinale</i>    | XYD05005        | EF221847 |
| <i>Dendrobium officinale</i>    | JH26-SH         | FJ216653 |
| <i>Dendrobium officinale</i>    | Jin X-H s.n. 11 | KF143647 |
| <i>Dendrobium officinale</i>    | Jin X-H s.n. 12 | KF143648 |
| <i>Dendrobium officinale</i>    | Jin X-H s.n. 1  | KF143649 |
| <i>Dendrobium officinale</i>    | Jin X-H s.n. 2  | KF143650 |
| <i>Dendrobium ovatum</i>        | SBB-0001        | HM055324 |
| <i>Dendrobium ovatum</i>        | SBB-0002        | HM055325 |
| <i>Dendrobium ovatum</i>        | SBB-0417        | HM055326 |
| <i>Dendrobium ovatum</i>        | SBB-0418        | HM055327 |
| <i>Dendrobium ovatum</i>        | SBB-0419        | HM055328 |
| <i>Dendrobium ovatum</i>        | SBB-0420        | HM055329 |
| <i>Dendrobium ovatum</i>        | SBB-0421        | HM055330 |
| <i>Dendrobium ovatum</i>        | SBB-0422        | HM055331 |
| <i>Dendrobium ovatum</i>        | SBB-0424        | HM055332 |
| <i>Dendrobium ovatum</i>        | SBB-0425        | HM055333 |
| <i>Dendrobium ovatum</i>        | SBB-0426        | HM055334 |
| <i>Dendrobium ovatum</i>        | SBB-0005        | HM055335 |
| <i>Dendrobium pachyphyllum</i>  | FAN.FH.392      | KC682485 |

|                                  |                          |          |
|----------------------------------|--------------------------|----------|
| <i>Dendrobium parciflorum</i>    | HNSH-SH                  | FJ216667 |
| <i>Dendrobium parciflorum</i>    | Jin X-H 10113            | KF143676 |
| <i>Dendrobium parishii</i>       | SBB-0527                 | HM055336 |
| <i>Dendrobium parishii</i>       | SBB-0528                 | HM055337 |
| <i>Dendrobium parishii</i>       | SBB-0997                 | JF713431 |
| <i>Dendrobium peguanum</i>       | SBB-0318                 | HM055338 |
| <i>Dendrobium peguanum</i>       | SBB-0319                 | HM055339 |
| <i>Dendrobium peguanum</i>       | SBB-0397                 | HM055340 |
| <i>Dendrobium peguanum</i>       | SBB-0398                 | HM055341 |
| <i>Dendrobium peguanum</i>       | SBB-0399                 | HM055342 |
| <i>Dendrobium peguanum</i>       | SBB-0400                 | HM055343 |
| <i>Dendrobium peguanum</i>       | SBB-0401                 | HM055344 |
| <i>Dendrobium peguanum</i>       | SBB-0402                 | HM055345 |
| <i>Dendrobium peguanum</i>       | SBB-0404                 | HM055346 |
| <i>Dendrobium peguanum</i>       | SBB-0405                 | HM055347 |
| <i>Dendrobium peguanum</i>       | SBB-0406                 | HM055348 |
| <i>Dendrobium pendulum</i>       | JH14-SH                  | FJ216641 |
| <i>Dendrobium pendulum</i>       | Jin X-H s.n. 6           | KF143705 |
| <i>Dendrobium pendulum</i>       | Jin X-H s.n. 7           | KF143706 |
| <i>Dendrobium pendulum</i>       | Jin X-H 8064             | KF143707 |
| <i>Dendrobium porphyrochilum</i> | Jin X-H 7033             | KF143709 |
| <i>Dendrobium porphyrochilum</i> | Jin X-H 11880            | KF143710 |
| <i>Dendrobium prasinum</i>       | 304KM                    | AJ310020 |
| <i>Dendrobium primulinum</i>     | JH22-SH                  | FJ216649 |
| <i>Dendrobium primulinum</i>     | SMBC-SH                  | FJ216669 |
| <i>Dendrobium primulinum</i>     | SBB-0170                 | HM055349 |
| <i>Dendrobium primulinum</i>     | SBB-0171                 | HM055350 |
| <i>Dendrobium primulinum</i>     | SBB-0224                 | HM055351 |
| <i>Dendrobium primulinum</i>     | SBB-0225                 | HM055352 |
| <i>Dendrobium primulinum</i>     | SBB-0238                 | HM055353 |
| <i>Dendrobium primulinum</i>     | SBB-0273                 | HM055354 |
| <i>Dendrobium primulinum</i>     | SBB-0274                 | HM055355 |
| <i>Dendrobium primulinum</i>     | SBB-0276                 | HM055356 |
| <i>Dendrobium primulinum</i>     | SBB-0277                 | HM055357 |
| <i>Dendrobium primulinum</i>     | SBB-0278                 | HM055358 |
| <i>Dendrobium primulinum</i>     | SBB-0533                 | HM055359 |
| <i>Dendrobium primulinum</i>     | SBB-0994                 | JF713432 |
| <i>Dendrobium primulinum</i>     | Jin X-H 10793            | KF143708 |
| <i>Dendrobium pseudotenellum</i> | Jin X-H 13500            | KF143711 |
| <i>Dendrobium pulchellum</i>     | Jin X-H 11878            | KF143712 |
| <i>Dendrobium quadrilobatum</i>  | RG 2970                  | KC682493 |
| <i>Dendrobium rosellum</i>       | UPM / D001               | JF305822 |
| <i>Dendrobium rosellum</i>       | D001                     | KC663439 |
| <i>Dendrobium ruckeri</i>        | Kurzweil H & Lwin S 2536 | KF143713 |
| <i>Dendrobium ruckeri</i>        | Kurzweil H & Lwin S 2545 | KF143714 |
| <i>Dendrobium salaccense</i>     | Jin X-H 9284             | KF143715 |
| <i>Dendrobium salaccense</i>     | Jin X-H 7760             | KF143716 |
| <i>Dendrobium scoriarum</i>      | Jin X-H 13569            | KF143717 |
| <i>Dendrobium senile</i>         | Jin X-H s.n. 8           | KF143718 |
| <i>Dendrobium setifolium</i>     | RG 2779                  | KC663438 |
| <i>Dendrobium sinense</i>        | Jin X-H 10131            | KF143719 |
| <i>Dendrobium sinense</i>        | Jin X-H 9328             | KF143720 |
| <i>Dendrobium singaporensis</i>  | RG 2635                  | KC682488 |
| <i>Dendrobium striatellum</i>    | RG 2969                  | KC682489 |



|                                  |                 |          |
|----------------------------------|-----------------|----------|
| <i>Dendrobium strongylanthum</i> | Jin X-H 9499    | KF143723 |
| <i>Dendrobium strongylanthum</i> | ST-ET 1865      | KF143724 |
| <i>Dendrobium stuposum</i>       | JH18-SH         | FJ216645 |
| <i>Dendrobium stuposum</i>       | Jin X-H 7027    | KF143725 |
| <i>Dendrobium subulatum</i>      | LST 023         | KC682480 |
| <i>Dendrobium sulcatum</i>       | Jin X-H 11879   | KF143726 |
| <i>Dendrobium thyrsoflorum</i>   | SBB-0518        | HM055360 |
| <i>Dendrobium thyrsoflorum</i>   | SBB-0520        | HM055361 |
| <i>Dendrobium thyrsoflorum</i>   | SBB-0519        | JF713433 |
| <i>Dendrobium thyrsoflorum</i>   | Jin X-H 10755   | KF143728 |
| <i>Dendrobium transparens</i>    | Jin X-H 11046   | KF143729 |
| <i>Dendrobium trigonopus</i>     | JH07-SH         | FJ216634 |
| <i>Dendrobium trigonopus</i>     | Jin X-H 10750   | KF143730 |
| <i>Dendrobium trigonopus</i>     | Jin X-H 10718   | KF143731 |
| <i>Dendrobium truncatum</i>      | RG 2625         | KC682483 |
| <i>Dendrobium unicum</i>         | Jin X-H 13541   | KF143732 |
| <i>Dendrobium wangliangii</i>    | Hu G-W 24479    | KF143733 |
| <i>Dendrobium wardianum</i>      | JH12-SH         | FJ216639 |
| <i>Dendrobium wardianum</i>      | SMDB-SH         | FJ216670 |
| <i>Dendrobium wardianum</i>      | SBB-0998        | JF713434 |
| <i>Dendrobium wattii</i>         | Jin X-H 11817   | KF143734 |
| <i>Dendrobium wilsonii</i>       | Jin X-H 9778    | KF143735 |
| <i>Dendrobium xichouense</i>     | Jin X-H s.n. 14 | KF143736 |
| <i>Liparis kumokiri</i>          | EWH:Lee 228     | EU017439 |

#### **Taxon (rbcL)**

| <b>Taxon (rbcL)</b>            | <b>Voucher</b>  | <b>rbcL</b>     |
|--------------------------------|-----------------|-----------------|
| <i>Dendrobium acerosum</i>     | WY 302          | KC660976        |
| <i>Dendrobium acinaciforme</i> | JYSH-SH         | FJ216578        |
| <i>Dendrobium acinaciforme</i> | Jin X-H 10742   | KF177653        |
| <i>Dendrobium acinaciforme</i> | Jin X-H 7757    | KF177654        |
| <i>Dendrobium aduncum</i>      | JH32-SH         | FJ216572        |
| <i>Dendrobium aduncum</i>      | SBB-0309        | JF713125        |
| <i>Dendrobium aduncum</i>      | Jin X-H 9522    | KF177571        |
| <i>Dendrobium aduncum</i>      | Jin X.H.059     | <b>KJ187352</b> |
| <i>Dendrobium aduncum</i>      | Jin X.H.060     | <b>KJ187353</b> |
| <i>Dendrobium aduncum</i>      | Jin X.H.061     | <b>KJ187354</b> |
| <i>Dendrobium aduncum</i>      | Jin X.H.062     | <b>KJ187355</b> |
| <i>Dendrobium aggregatum</i>   | Jarrell 15      | AF074145        |
| <i>Dendrobium aggregatum</i>   | Jin X-H s.n. 10 | KF177572        |
| <i>Dendrobium aloifolium</i>   | WY 193          | KC660972        |
| <i>Dendrobium amoenum</i>      | SBB-0137        | HM055056        |
| <i>Dendrobium amoenum</i>      | SBB-0141        | HM055057        |
| <i>Dendrobium amoenum</i>      | SBB-0142        | HM055058        |
| <i>Dendrobium amoenum</i>      | SBB-0248        | HM055059        |
| <i>Dendrobium amoenum</i>      | SBB-0249        | HM055060        |
| <i>Dendrobium amoenum</i>      | SBB-0560        | HM055061        |
| <i>Dendrobium amoenum</i>      | SBB-0575        | HM055062        |
| <i>Dendrobium amoenum</i>      | SBB-0138        | JF713126        |
| <i>Dendrobium amoenum</i>      | SBB-0247        | JF713127        |
| <i>Dendrobium amplum</i>       | SBB-0489        | JN005429        |
| <i>Dendrobium anceps</i>       | SBB-0119        | JF713128        |
| <i>Dendrobium anceps</i>       | SBB-0301        | JF713129        |
| <i>Dendrobium anceps</i>       | SBB-0548        | JF713130        |
| <i>Dendrobium aphyllum</i>     | SBB-0288        | HM055064        |

|                               |                |                 |
|-------------------------------|----------------|-----------------|
| <i>Dendrobium aphyllum</i>    | SBB-0306       | HM055065        |
| <i>Dendrobium aphyllum</i>    | SBB-0536       | HM055066        |
| <i>Dendrobium aphyllum</i>    | SBB-0551       | HM055067        |
| <i>Dendrobium aphyllum</i>    | SBB-0552       | HM055068        |
| <i>Dendrobium aphyllum</i>    | SBB-0553       | HM055069        |
| <i>Dendrobium aphyllum</i>    | SBB-0561       | HM055070        |
| <i>Dendrobium aphyllum</i>    | SBB-0595       | HM055071        |
| <i>Dendrobium aphyllum</i>    | SBB-0596       | HM055072        |
| <i>Dendrobium aphyllum</i>    | SBB-0597       | HM055073        |
| <i>Dendrobium aphyllum</i>    | SBB-0598       | HM055074        |
| <i>Dendrobium aphyllum</i>    | SBB-0599       | HM055075        |
| <i>Dendrobium aphyllum</i>    | SBB-0600       | HM055076        |
| <i>Dendrobium aphyllum</i>    | SBB-0628       | HM055077        |
| <i>Dendrobium aphyllum</i>    | Jin X-H 10798  | KF177573        |
| <i>Dendrobium aqueum</i>      | SBB-1051       | JF713131        |
| <i>Dendrobium aqueum</i>      | SBB-0359       | JF713132        |
| <i>Dendrobium aqueum</i>      | SBB-0360       | JF713133        |
| <i>Dendrobium aqueum</i>      | SBB-0361       | JF713134        |
| <i>Dendrobium aqueum</i>      | SBB-0362       | JF713135        |
| <i>Dendrobium aqueum</i>      | SBB-0363       | JF713136        |
| <i>Dendrobium aqueum</i>      | SBB-0364       | JF713137        |
| <i>Dendrobium aqueum</i>      | SBB-0365       | JF713138        |
| <i>Dendrobium aqueum</i>      | SBB-0367       | JF713139        |
| <i>Dendrobium barbatulum</i>  | SBB-0407       | JF713140        |
| <i>Dendrobium barbatulum</i>  | SBB-0408       | JF713141        |
| <i>Dendrobium barbatulum</i>  | SBB-0409       | JF713142        |
| <i>Dendrobium barbatulum</i>  | SBB-0410       | JF713143        |
| <i>Dendrobium barbatulum</i>  | SBB-0411       | JF713144        |
| <i>Dendrobium barbatulum</i>  | SBB-0412       | JF713145        |
| <i>Dendrobium barbatulum</i>  | SBB-0413       | JF713146        |
| <i>Dendrobium barbatulum</i>  | SBB-0414       | JF713147        |
| <i>Dendrobium barbatulum</i>  | SBB-0415       | JF713148        |
| <i>Dendrobium barbatulum</i>  | SBB-0416       | JF713149        |
| <i>Dendrobium bellatulum</i>  | Jin X-H 5699   | KF177574        |
| <i>Dendrobium bensoniae</i>   | SBB-0544       | HM055079        |
| <i>Dendrobium bensoniae</i>   | SBB-0543       | HM055078        |
| <i>Dendrobium bicameratum</i> | SBB-0213       | HM055080        |
| <i>Dendrobium bicameratum</i> | SBB-0215       | HM055081        |
| <i>Dendrobium bicameratum</i> | SBB-0216       | HM055082        |
| <i>Dendrobium bicameratum</i> | SBB-0222       | HM055083        |
| <i>Dendrobium bicameratum</i> | SBB-0223       | HM055084        |
| <i>Dendrobium bicameratum</i> | SBB-0217       | JF713150        |
| <i>Dendrobium bicameratum</i> | SBB-0221       | JF713151        |
| <i>Dendrobium bicameratum</i> | SBB-0226       | JF713152        |
| <i>Dendrobium bicameratum</i> | SBB-0228       | JF713153        |
| <i>Dendrobium bicameratum</i> | SBB-0239       | JF713154        |
| <i>Dendrobium brymerianum</i> | JH13-SH        | FJ216554        |
| <i>Dendrobium brymerianum</i> | Jin X-H 10782  | KF177575        |
| <i>Dendrobium brymerianum</i> | Jin X.H.066    | <b>KJ187356</b> |
| <i>Dendrobium brymerianum</i> | Jin X.H. 11044 | <b>KJ187357</b> |
| <i>Dendrobium capillipes</i>  | JH02-SH        | FJ216545        |
| <i>Dendrobium capillipes</i>  | Jin X-H 10757  | KF177576        |
| <i>Dendrobium cariniferum</i> | Jin X-H 13012  | KF177577        |
| <i>Dendrobium cariniferum</i> | Jin X-H 10754  | KF177578        |

|                                |                         |          |
|--------------------------------|-------------------------|----------|
| <i>Dendrobium cariniferum</i>  | Jin X-H 11024           | KF177579 |
| <i>Dendrobium christyanum</i>  | Jin X-H 11045           | KF177584 |
| <i>Dendrobium christyanum</i>  | Jin s.n. 3              | KF177585 |
| <i>Dendrobium chrysanthum</i>  | JH19-SH                 | FJ216560 |
| <i>Dendrobium chrysanthum</i>  | SBB-0503                | HM055085 |
| <i>Dendrobium chrysanthum</i>  | SBB-0563                | HM055086 |
| <i>Dendrobium chrysanthum</i>  | SBB-0583                | HM055087 |
| <i>Dendrobium chrysanthum</i>  | SBB-0618                | HM055088 |
| <i>Dendrobium chrysanthum</i>  | SBB-0619                | HM055089 |
| <i>Dendrobium chrysanthum</i>  | SBB-0620                | HM055090 |
| <i>Dendrobium chrysanthum</i>  | SBB-0621                | HM055091 |
| <i>Dendrobium chrysanthum</i>  | SBB-0622                | HM055092 |
| <i>Dendrobium chrysanthum</i>  | SBB-1010                | JF713155 |
| <i>Dendrobium chrysanthum</i>  | SBB-0992                | JF713156 |
| <i>Dendrobium chrysanthum</i>  | Jin X-H 11430           | KF177586 |
| <i>Dendrobium chrysanthum</i>  | SET-ET 1186             | KJ187358 |
| <i>Dendrobium chrysanthum</i>  | SET-ET 1274             | KJ187359 |
| <i>Dendrobium chrysotoxum</i>  | JH01-SH                 | FJ216544 |
| <i>Dendrobium chrysotoxum</i>  | JHGC-SH                 | FJ216576 |
| <i>Dendrobium chrysotoxum</i>  | SMGC-SH                 | FJ216582 |
| <i>Dendrobium chrysotoxum</i>  | SBB-0515                | HM055093 |
| <i>Dendrobium chrysotoxum</i>  | SBB-0517                | HM055094 |
| <i>Dendrobium chrysotoxum</i>  | SBB-0516                | JF713157 |
| <i>Dendrobium chrysotoxum</i>  | Jin X-H 10731           | KF177587 |
| <i>Dendrobium compactum</i>    | Jin X-H 11849           | KF177588 |
| <i>Dendrobium crepidatum</i>   | JH21-SH                 | FJ216562 |
| <i>Dendrobium crepidatum</i>   | SMMG-SH                 | FJ216584 |
| <i>Dendrobium crepidatum</i>   | SBB-0531                | HM055095 |
| <i>Dendrobium crepidatum</i>   | SBB-0435                | JF713158 |
| <i>Dendrobium crepidatum</i>   | SBB-0060                | JF713159 |
| <i>Dendrobium crepidatum</i>   | SBB-0061                | JF713160 |
| <i>Dendrobium crepidatum</i>   | SBB-0062                | JF713161 |
| <i>Dendrobium crepidatum</i>   | SBB-0063                | JF713162 |
| <i>Dendrobium crepidatum</i>   | SBB-0064                | JF713163 |
| <i>Dendrobium crepidatum</i>   | Jin X-H 10843           | KF177589 |
| <i>Dendrobium crepidatum</i>   | Jin X.H.069             | KJ187360 |
| <i>Dendrobium crepidatum</i>   | Jin X.H.070             | KJ187361 |
| <i>Dendrobium crepidatum</i>   | Jin X.H.072             | KJ187362 |
| <i>Dendrobium crepidatum</i>   | Jin X.H.071             | KJ187363 |
| <i>Dendrobium crumenatum</i>   | SBB-0124                | JF713164 |
| <i>Dendrobium crumenatum</i>   | SBB-0291                | JF713165 |
| <i>Dendrobium crumenatum</i>   | D008/M.M.1              | KC660968 |
| <i>Dendrobium crystallinum</i> | Shiraishi s.n           | D58407   |
| <i>Dendrobium crystallinum</i> | JH23-SH                 | FJ216564 |
| <i>Dendrobium crystallinum</i> | Jin X-H 11031           | KF177590 |
| <i>Dendrobium crystallinum</i> | Jin X.H. 6959           | KJ187364 |
| <i>Dendrobium denneanum</i>    | Jin X-H 10899           | KF177591 |
| <i>Dendrobium denneanum</i>    | Jin X-H 10840           | KF177592 |
| <i>Dendrobium denneanum</i>    | Jin X-H & Lai Y-J 11011 | KF177593 |
| <i>Dendrobium denneanum</i>    | Jin X.H. 11011          | KJ187365 |
| <i>Dendrobium densiflorum</i>  | MHSH-SH                 | FJ216580 |
| <i>Dendrobium densiflorum</i>  | SBB-0547                | HM055096 |
| <i>Dendrobium densiflorum</i>  | SBB-1001                | JF713167 |
| <i>Dendrobium densiflorum</i>  | SBB-1015                | JF713168 |

|                                    |                |          |
|------------------------------------|----------------|----------|
| <i>Dendrobium densiflorum</i>      | SBB-1016       | JF713169 |
| <i>Dendrobium densiflorum</i>      | SBB-0120       | JF713170 |
| <i>Dendrobium densiflorum</i>      | SBB-0027       | JF713171 |
| <i>Dendrobium densiflorum</i>      | SET-ET 1272    | KF177594 |
| <i>Dendrobium denudans</i>         | Jin X-H 8510   | KF177595 |
| <i>Dendrobium devonianum</i>       | JH25-SH        | FJ216566 |
| <i>Dendrobium devonianum</i>       | SBB-1011       | JF713172 |
| <i>Dendrobium devonianum</i>       | SBB-0513       | JF713173 |
| <i>Dendrobium devonianum</i>       | SBB-0514       | JF713174 |
| <i>Dendrobium devonianum</i>       | Jin X-H 10302  | KF177596 |
| <i>Dendrobium devonianum</i>       | Jin X.H. 9902  | KJ187366 |
| <i>Dendrobium devonianum</i>       | Jin X.H. 11030 | KJ187367 |
| <i>Dendrobium devonianum</i>       | Jin X.H. 6947  | KJ187368 |
| <i>Dendrobium dixanthum</i>        | Jin X-H 13017  | KF177597 |
| <i>Dendrobium dixanthum</i>        | Jin X.H.107    | KJ187369 |
| <i>Dendrobium draconis</i>         | SBB-0546       | HM055097 |
| <i>Dendrobium draconis</i>         | SBB-0545       | JF713175 |
| <i>Dendrobium ellipsophyllum</i>   | Jin X-H 13066  | KF177598 |
| <i>Dendrobium exile</i>            | Jin X-H 10776  | KF177599 |
| <i>Dendrobium exile</i>            | Jin X-H 10780  | KF177600 |
| <i>Dendrobium falconeri</i>        | JH20-SH        | FJ216561 |
| <i>Dendrobium falconeri</i>        | SBB-1013       | JF713176 |
| <i>Dendrobium falconeri</i>        | Jin X-H 8200   | KF177674 |
| <i>Dendrobium falconeri</i>        | Jin X.H.077    | KJ187370 |
| <i>Dendrobium falconeri</i>        | Jin X.H. 8977  | KJ187371 |
| <i>Dendrobium fanjingshanense</i>  | Jin X-H 10102  | KF177601 |
| <i>Dendrobium fanjingshanense</i>  | Jin s.n. 13    | KF177602 |
| <i>Dendrobium fanjingshanense</i>  | Jin X.H.108    | KJ187372 |
| <i>Dendrobium fanjingshanense</i>  | Jin X.H.078    | KJ187373 |
| <i>Dendrobium fanjingshanense</i>  | Jin X.H.079    | KJ187374 |
| <i>Dendrobium farmeri</i>          | SBB-0537       | HM055098 |
| <i>Dendrobium farmeri</i>          | SBB-0538       | HM055099 |
| <i>Dendrobium farmeri</i>          | SBB-0549       | HM055100 |
| <i>Dendrobium fimbriatum</i>       | JH08-SH        | FJ216550 |
| <i>Dendrobium fimbriatum</i>       | SBB-0507       | HM055101 |
| <i>Dendrobium fimbriatum</i>       | SBB-0508       | HM055102 |
| <i>Dendrobium fimbriatum</i>       | SBB-0509       | HM055103 |
| <i>Dendrobium fimbriatum</i>       | SBB-0510       | HM055104 |
| <i>Dendrobium fimbriatum</i>       | SBB-0562       | HM055105 |
| <i>Dendrobium fimbriatum</i>       | SBB-0304       | JF713177 |
| <i>Dendrobium fimbriatum</i>       | SBB-0323       | JF713178 |
| <i>Dendrobium fimbriatum</i>       | Jin s.n. 16    | KF177603 |
| <i>Dendrobium findleyanum</i>      | JH17-SH        | FJ216558 |
| <i>Dendrobium findleyanum</i>      | Jin X-H 11875  | KF177604 |
| <i>Dendrobium fugax</i>            | SBB-0295       | JN005430 |
| <i>Dendrobium gibsonii</i>         | JH10-SH        | FJ216551 |
| <i>Dendrobium goldschmidtianum</i> | Chung S-W      | KF177605 |
| <i>Dendrobium gratiosissimum</i>   | JH16-SH        | FJ216557 |
| <i>Dendrobium gratiosissimum</i>   | Jin X-H 10781  | KF177606 |
| <i>Dendrobium gratiosissimum</i>   | Jin X-H 10758  | KF177675 |
| <i>Dendrobium haemoglossum</i>     | SBB-0114       | JF713179 |
| <i>Dendrobium haemoglossum</i>     | SBB-0289       | JF713180 |
| <i>Dendrobium haemoglossum</i>     | SBB-0317       | JF713181 |
| <i>Dendrobium hancockii</i>        | JH29-SH        | FJ216569 |

|                                 |                          |          |
|---------------------------------|--------------------------|----------|
| <i>Dendrobium hancockii</i>     | Jin X-H 13492            | KF177608 |
| <i>Dendrobium hancockii</i>     | Jin X.H.109              | KJ187375 |
| <i>Dendrobium harveyanum</i>    | JH05-SH                  | FJ216548 |
| <i>Dendrobium harveyanum</i>    | Jin X-H 10760            | KF177609 |
| <i>Dendrobium harveyanum</i>    | Jin X.H. 10703           | KJ187376 |
| <i>Dendrobium henanense</i>     | Jin X-H 9772             | KF177610 |
| <i>Dendrobium henanense</i>     | Jin X.H. 9235            | KJ187377 |
| <i>Dendrobium henryi</i>        | YN-ET 990                | KF177611 |
| <i>Dendrobium henryi</i>        | Jin X.H. 11048           | KJ187380 |
| <i>Dendrobium henryi</i>        | Jin X.H. 11822           | KJ187381 |
| <i>Dendrobium herbaceum</i>     | SBB-0045                 | HM055107 |
| <i>Dendrobium herbaceum</i>     | SBB-0046                 | HM055108 |
| <i>Dendrobium herbaceum</i>     | SBB-0006                 | HM055109 |
| <i>Dendrobium hercoglossum</i>  | Jin X-H 10109            | KF177612 |
| <i>Dendrobium hercoglossum</i>  | Jin X-H 17               | KF177613 |
| <i>Dendrobium hercoglossum</i>  | Jin X.H. 9522            | KJ187382 |
| <i>Dendrobium heterocarpum</i>  | JH15-SH                  | FJ216556 |
| <i>Dendrobium heterocarpum</i>  | SBB-1008                 | JF713182 |
| <i>Dendrobium heterocarpum</i>  | SBB-0502                 | JF713183 |
| <i>Dendrobium heterocarpum</i>  | SBB-0993                 | JF713184 |
| <i>Dendrobium heterocarpum</i>  | Jin X-H 12014            | KF177614 |
| <i>Dendrobium hookerianum</i>   | SET-ET 1137              | KF177615 |
| <i>Dendrobium hookerianum</i>   | Jin X-H 10367            | KF177616 |
| <i>Dendrobium hookerianum</i>   | Jin X.H. 9102            | KJ187384 |
| <i>Dendrobium huoshanense</i>   | Jin X-H 9768             | KF177617 |
| <i>Dendrobium hymenanthum</i>   | RG 2154                  | KC660978 |
| <i>Dendrobium infundibulum</i>  | SBB-0529                 | HM055110 |
| <i>Dendrobium infundibulum</i>  | SBB-0530                 | HM055111 |
| <i>Dendrobium infundibulum</i>  | SBB-0991                 | JF713185 |
| <i>Dendrobium infundibulum</i>  | Jin X-H 11877            | KF177618 |
| <i>Dendrobium jenkinsii</i>     | SBB-0524                 | HM055112 |
| <i>Dendrobium jenkinsii</i>     | SBB-0525                 | HM055113 |
| <i>Dendrobium jenkinsii</i>     | SBB-0526                 | HM055114 |
| <i>Dendrobium jenkinsii</i>     | SBB-1018                 | JF713186 |
| <i>Dendrobium jenkinsii</i>     | Jin X-H 10709            | KF177619 |
| <i>Dendrobium jenkinsii</i>     | Jin s.n. 4               | KF177620 |
| <i>Dendrobium kingianum</i>     | Chase O-164 (K)          | AF074146 |
| <i>Dendrobium lindleyi</i>      | USBG 99-2351             | EF590520 |
| <i>Dendrobium lindleyi</i>      | SBB-0521                 | HM055115 |
| <i>Dendrobium lindleyi</i>      | SBB-0522                 | HM055116 |
| <i>Dendrobium lindleyi</i>      | SBB-0523                 | HM055117 |
| <i>Dendrobium lituiflorum</i>   | JH24-SH                  | FJ216565 |
| <i>Dendrobium loddigesii</i>    | JH35-SH                  | FJ216573 |
| <i>Dendrobium loddigesii</i>    | P6860                    | JF949999 |
| <i>Dendrobium loddigesii</i>    | Jin s.n. 15              | KF177622 |
| <i>Dendrobium lohohense</i>     | Jin X-H 9769             | KF177623 |
| <i>Dendrobium longicornu</i>    | SET-ET 1347              | KF177624 |
| <i>Dendrobium longicornu</i>    | Kurzweil H & Lwin S 2647 | KF177625 |
| <i>Dendrobium longicornu</i>    | Jin X-H 11663            | KF177626 |
| <i>Dendrobium macraei</i>       | SBB-0555                 | JN005431 |
| <i>Dendrobium macraei</i>       | SBB-0564                 | JN005432 |
| <i>Dendrobium macraei</i>       | SBB-0577                 | JN005433 |
| <i>Dendrobium macrostachyum</i> | SBB-0134                 | HM055118 |
| <i>Dendrobium macrostachyum</i> | SBB-0007                 | HM055119 |



|                                 |                |          |
|---------------------------------|----------------|----------|
| <i>Dendrobium macrostachyum</i> | SBB-0008       | HM055120 |
| <i>Dendrobium menglaense</i>    | Jin X-H 10464  | KF177627 |
| <i>Dendrobium microbulbon</i>   | SBB-0333       | JF713187 |
| <i>Dendrobium microbulbon</i>   | SBB-0334       | JF713188 |
| <i>Dendrobium microbulbon</i>   | SBB-0335       | JF713189 |
| <i>Dendrobium microbulbon</i>   | SBB-0337       | JF713190 |
| <i>Dendrobium microbulbon</i>   | SBB-0338       | JF713191 |
| <i>Dendrobium minutiflorum</i>  | Jin X-H 10468  | KF177628 |
| <i>Dendrobium minutiflorum</i>  | Jin X-H 6979   | KF177629 |
| <i>Dendrobium monilliforme</i>  | PDBK2007-0736  | KC704892 |
| <i>Dendrobium monilliforme</i>  | PDBK2007-0737  | KC704893 |
| <i>Dendrobium monilliforme</i>  | Jin X-H 8960   | KF177630 |
| <i>Dendrobium monilliforme</i>  | Jin X-H 8957   | KF177631 |
| <i>Dendrobium monilliforme</i>  | Jin X-H 10895  | KF177632 |
| <i>Dendrobium monilliforme</i>  | Jin X.H.087    | KJ187385 |
| <i>Dendrobium monilliforme</i>  | Jin X.H. 10080 | KJ187386 |
| <i>Dendrobium monilliforme</i>  | Jin X.H.088    | KJ187387 |
| <i>Dendrobium monilliforme</i>  | Jin X.H.089    | KJ187388 |
| <i>Dendrobium monilliforme</i>  | Jin X.H.090    | KJ187389 |
| <i>Dendrobium monilliforme</i>  | Jin X.H. 8999  | KJ187390 |
| <i>Dendrobium monilliforme</i>  | Jin X.H. 6976  | KJ187391 |
| <i>Dendrobium monilliforme</i>  | Jin X.H.091    | KJ187392 |
| <i>Dendrobium monilliforme</i>  | Jin X.H. 10921 | KJ187393 |
| <i>Dendrobium monilliforme</i>  | Jin X.H.092    | KJ187394 |
| <i>Dendrobium moschatum</i>     | SBB-0511       | HM055121 |
| <i>Dendrobium moschatum</i>     | SBB-0512       | HM055122 |
| <i>Dendrobium moschatum</i>     | SBB-0567       | HM055123 |
| <i>Dendrobium moschatum</i>     | SBB-0568       | HM055124 |
| <i>Dendrobium moschatum</i>     | SBB-0569       | HM055125 |
| <i>Dendrobium moschatum</i>     | SBB-0630       | HM055126 |
| <i>Dendrobium moschatum</i>     | SBB-1014       | JF713192 |
| <i>Dendrobium moschatum</i>     | Jin X-H 11886  | KF177633 |
| <i>Dendrobium nobile</i>        | USBG 97-0141   | EF590519 |
| <i>Dendrobium nobile</i>        | JH30-SH        | FJ216570 |
| <i>Dendrobium nobile</i>        | JHJC-SH        | FJ216577 |
| <i>Dendrobium nobile</i>        | SMJC-SH        | FJ216583 |
| <i>Dendrobium nobile</i>        | USBG 97-0141   | GQ248590 |
| <i>Dendrobium nobile</i>        | SBB-0539       | HM055127 |
| <i>Dendrobium nobile</i>        | SBB-0540       | HM055128 |
| <i>Dendrobium nobile</i>        | SBB-0541       | HM055129 |
| <i>Dendrobium nobile</i>        | SBB-0542       | HM055130 |
| <i>Dendrobium nobile</i>        | ST-ET 1990     | KF177634 |
| <i>Dendrobium nobile</i>        | SET-ET 1143    | KF177635 |
| <i>Dendrobium nobile</i>        | KL2761         | KJ187395 |
| <i>Dendrobium nobile</i>        | Jin X.H. 10759 | KJ187396 |
| <i>Dendrobium nobile</i>        | Jin X.H.093    | KJ187397 |
| <i>Dendrobium nodosum</i>       | SBB-0298       | JN005434 |
| <i>Dendrobium nutantiflorum</i> | SBB-1046       | JF713193 |
| <i>Dendrobium nutantiflorum</i> | SBB-1047       | JF713194 |
| <i>Dendrobium nutantiflorum</i> | SBB-0032       | JF713195 |
| <i>Dendrobium ochreatum</i>     | SBB-0505       | HM055131 |
| <i>Dendrobium ochreatum</i>     | SBB-0506       | HM055132 |
| <i>Dendrobium ochreatum</i>     | SBB-1017       | JF713196 |
| <i>Dendrobium officinale</i>    | JH26-SH        | FJ216567 |

|                                  |                          |          |
|----------------------------------|--------------------------|----------|
| <i>Dendrobium officinale</i>     | Jin s.n. 11              | KF177580 |
| <i>Dendrobium officinale</i>     | Jin s.n. 12              | KF177581 |
| <i>Dendrobium officinale</i>     | Jin s.n. 1               | KF177582 |
| <i>Dendrobium officinale</i>     | Jin s.n. 2               | KF177583 |
| <i>Dendrobium ovatum</i>         | SBB-0002                 | HM055133 |
| <i>Dendrobium ovatum</i>         | SBB-0003                 | HM055134 |
| <i>Dendrobium ovatum</i>         | SBB-0004                 | HM055135 |
| <i>Dendrobium ovatum</i>         | SBB-0005                 | HM055136 |
| <i>Dendrobium pachyphyllum</i>   | FAN.FH.392               | KC660979 |
| <i>Dendrobium parciflorum</i>    | HNSH-SH                  | FJ216579 |
| <i>Dendrobium parciflorum</i>    | Jin X-H 10113            | KF177607 |
| <i>Dendrobium parishii</i>       | SBB-0527                 | HM055137 |
| <i>Dendrobium parishii</i>       | SBB-0528                 | HM055138 |
| <i>Dendrobium parishii</i>       | SBB-0997                 | JF713197 |
| <i>Dendrobium peguanum</i>       | SBB-0397                 | JF713198 |
| <i>Dendrobium peguanum</i>       | SBB-0398                 | JF713199 |
| <i>Dendrobium peguanum</i>       | SBB-0399                 | JF713200 |
| <i>Dendrobium peguanum</i>       | SBB-0400                 | JF713201 |
| <i>Dendrobium peguanum</i>       | SBB-0401                 | JF713202 |
| <i>Dendrobium peguanum</i>       | SBB-0402                 | JF713203 |
| <i>Dendrobium pendulum</i>       | JH14-SH                  | FJ216555 |
| <i>Dendrobium pendulum</i>       | Jin s.n. 7               | KF177638 |
| <i>Dendrobium pendulum</i>       | Jin X-H 8064             | KF177639 |
| <i>Dendrobium porphyrochilum</i> | Jin X-H 7033             | KF177641 |
| <i>Dendrobium porphyrochilum</i> | Jin X-H 11880            | KF177642 |
| <i>Dendrobium primulinum</i>     | JH22-SH                  | FJ216563 |
| <i>Dendrobium primulinum</i>     | SBB-0170                 | HM055139 |
| <i>Dendrobium primulinum</i>     | SBB-0224                 | HM055140 |
| <i>Dendrobium primulinum</i>     | SBB-0276                 | HM055141 |
| <i>Dendrobium primulinum</i>     | SBB-0278                 | HM055142 |
| <i>Dendrobium primulinum</i>     | SBB-0533                 | HM055143 |
| <i>Dendrobium primulinum</i>     | SBB-0171                 | JF713204 |
| <i>Dendrobium primulinum</i>     | SBB-0225                 | JF713205 |
| <i>Dendrobium primulinum</i>     | SBB-0238                 | JF713206 |
| <i>Dendrobium primulinum</i>     | Jin X-H 10793            | KF177640 |
| <i>Dendrobium pseudotenellum</i> | Jin X-H 13500            | KF177643 |
| <i>Dendrobium pulchellum</i>     | Jin X-H 11878            | KF177644 |
| <i>Dendrobium quadrilobatum</i>  | RG 2970                  | KC618534 |
| <i>Dendrobium rosellum</i>       | D001                     | KC618533 |
| <i>Dendrobium ruckeri</i>        | Kurzweil H & Lwin S 2536 | KF177645 |
| <i>Dendrobium ruckeri</i>        | Kurzweil H & Lwin S 2545 | KF177646 |
| <i>Dendrobium salaccense</i>     | Jin X-H 9284             | KF177647 |
| <i>Dendrobium salaccense</i>     | Jin X-H 7760             | KF177648 |
| <i>Dendrobium scoriarum</i>      | Jin X-H 13569            | KF177649 |
| <i>Dendrobium senile</i>         | Jin s.n. 8               | KF177650 |
| <i>Dendrobium setifolium</i>     | RG 2779                  | KC660973 |
| <i>Dendrobium sinense</i>        | Jin X-H 10131            | KF177651 |
| <i>Dendrobium sinense</i>        | Jin X-H 9328             | KF177652 |
| <i>Dendrobium singaporense</i>   | RG 2635                  | KC660975 |
| <i>Dendrobium striatellum</i>    | RG 2969                  | KC660977 |
| <i>Dendrobium strongylanthum</i> | Jin X-H 9499             | KF177655 |
| <i>Dendrobium strongylanthum</i> | ST-ET 1865               | KF177656 |
| <i>Dendrobium stuposum</i>       | JH18-SH                  | FJ216559 |
| <i>Dendrobium stuposum</i>       | Jin X-H 7027             | KF177657 |

|                                |               |          |
|--------------------------------|---------------|----------|
| <i>Dendrobium sulcatum</i>     | Jin X-H 11879 | KF177658 |
| <i>Dendrobium taurinum</i>     | Shiraishi 577 | D58408   |
| <i>Dendrobium terminale</i>    | RG 2783       | KC660970 |
| <i>Dendrobium thyrsiflorum</i> | SBB-0518      | HM055144 |
| <i>Dendrobium thyrsiflorum</i> | SBB-0519      | HM055145 |
| <i>Dendrobium thyrsiflorum</i> | SBB-0520      | HM055146 |
| <i>Dendrobium thyrsiflorum</i> | Jin X-H 10755 | KF177659 |
| <i>Dendrobium transparens</i>  | Jin X-H 11046 | KF177660 |
| <i>Dendrobium trigonopus</i>   | JH07-SH       | FJ216549 |
| <i>Dendrobium trigonopus</i>   | Jin X-H 10750 | KF177661 |
| <i>Dendrobium trigonopus</i>   | Jin X-H 10718 | KF177662 |
| <i>Dendrobium truncatum</i>    | RG 2625       | KC660969 |
| <i>Dendrobium unicum</i>       | Jin X-H 13541 | KF177663 |
| <i>Dendrobium wangliangii</i>  | Hu G-W 24479  | KF177664 |
| <i>Dendrobium wardianum</i>    | JH12-SH       | FJ216553 |
| <i>Dendrobium wardianum</i>    | SMDB-SH       | FJ216581 |
| <i>Dendrobium wardianum</i>    | SBB-0998      | JF713207 |
| <i>Dendrobium wattii</i>       | Jin X-H 11817 | KF177665 |
| <i>Dendrobium williamsonii</i> | JH04-SH       | FJ216547 |
| <i>Dendrobium wilsonii</i>     | Jin X-H 9778  | KF177666 |
| <i>Dendrobium xichouense</i>   | Jin s.n. 14   | KF177667 |
| <i>Liparis kumokiri</i>        | PDBK2010-1480 | KC704911 |

**Taxon (*trnH-psbA*)**

| <b>Taxon (<i>trnH-psbA</i>)</b>  | <b>Voucher</b>  | <b><i>trnH-psbA</i></b> |
|----------------------------------|-----------------|-------------------------|
| <i>Dendrobium acinaciforme</i>   | JYSH-SH         | EU887944                |
| <i>Dendrobium acinaciforme</i>   | Jin X-H 10742   | KF177550                |
| <i>Dendrobium acinaciforme</i>   | Jin X-H 7757    | KF177551                |
| <i>Dendrobium adae</i>           | JMB101          | KC811566                |
| <i>Dendrobium aduncum</i>        | JH32-SH         | FJ216483                |
| <i>Dendrobium aduncum</i>        | Jin X-H 9522    | KF177467                |
| <i>Dendrobium aduncum</i>        | Jin X.H.059     | KJ174241                |
| <i>Dendrobium aduncum</i>        | Jin X.H.060     | KJ174242                |
| <i>Dendrobium aduncum</i>        | Jin X.H.061     | KJ174243                |
| <i>Dendrobium aduncum</i>        | Jin X.H.062     | KJ174244                |
| <i>Dendrobium aemulum</i>        | JMB152          | KC811576                |
| <i>Dendrobium aggregatum</i>     | Jin X-H s.n. 10 | KF177468                |
| <i>Dendrobium aphyllum</i>       | JH31-SH         | EU887939                |
| <i>Dendrobium aphyllum</i>       | JHDC-SH         | FJ216486                |
| <i>Dendrobium aphyllum</i>       | XYD06010        | FJ385772                |
| <i>Dendrobium aphyllum</i>       | Jin X-H 10798   | KF177469                |
| <i>Dendrobium bellatulum</i>     | Jin X-H 5699    | KF177470                |
| <i>Dendrobium bifalce</i>        | JMB169          | KC811577                |
| <i>Dendrobium brymerianum</i>    | JH13-SH         | EU887932                |
| <i>Dendrobium brymerianum</i>    | Jin X-H 10782   | KF177471                |
| <i>Dendrobium brymerianum</i>    | Jin X.H.066     | KJ174245                |
| <i>Dendrobium brymerianum</i>    | Jin X.H. 11044  | KJ174246                |
| <i>Dendrobium callitrophilum</i> | JMB173          | KC811579                |
| <i>Dendrobium capillipes</i>     | JH02 -SH        | EU887926                |
| <i>Dendrobium capillipes</i>     | Jin X-H 10757   | KF177472                |
| <i>Dendrobium cariniferum</i>    | Jin X-H 13012   | KF177473                |
| <i>Dendrobium cariniferum</i>    | Jin X-H 10754   | KF177474                |
| <i>Dendrobium cariniferum</i>    | Jin X-H 11024   | KF177475                |
| <i>Dendrobium christyanum</i>    | Jin X-H 11045   | KF177480                |
| <i>Dendrobium christyanum</i>    | Jin s.n. 3      | KF177481                |



|                                   |                         |          |
|-----------------------------------|-------------------------|----------|
| <i>Dendrobium chrysanthum</i>     | JH19-SH                 | EU887934 |
| <i>Dendrobium chrysanthum</i>     | Jin X-H 11430           | KF177482 |
| <i>Dendrobium chrysanthum</i>     | SET-ET 1186             | KJ174247 |
| <i>Dendrobium chrysanthum</i>     | SET-ET 1274             | KJ174248 |
| <i>Dendrobium chrysotoxum</i>     | JH01-SH                 | EU887923 |
| <i>Dendrobium chrysotoxum</i>     | JHGC-SH                 | EU887924 |
| <i>Dendrobium chrysotoxum</i>     | SMGC-SH                 | EU887925 |
| <i>Dendrobium chrysotoxum</i>     | Jin X-H 10731           | KF177483 |
| <i>Dendrobium compactum</i>       | Jin X-H 11849           | KF177484 |
| <i>Dendrobium crepidatum</i>      | JH21-SH                 | EU887935 |
| <i>Dendrobium crepidatum</i>      | SMMG-SH                 | FJ216488 |
| <i>Dendrobium crepidatum</i>      | Jin X-H 10843           | KF177485 |
| <i>Dendrobium crepidatum</i>      | Jin X.H.069             | KJ174249 |
| <i>Dendrobium crepidatum</i>      | Jin X.H.070             | KJ174250 |
| <i>Dendrobium crepidatum</i>      | Jin X.H.071             | KJ174251 |
| <i>Dendrobium crepidatum</i>      | Jin X.H.072             | KJ174252 |
| <i>Dendrobium crystallinum</i>    | JH23-SH                 | FJ216476 |
| <i>Dendrobium crystallinum</i>    | Jin X-H 11031           | KF177486 |
| <i>Dendrobium crystallinum</i>    | Jin X.H. 6959           | KJ174253 |
| <i>Dendrobium cunninghamii</i>    | JMB271                  | KC811592 |
| <i>Dendrobium denneanum</i>       | Jin X.H. 11011          | KJ174254 |
| <i>Dendrobium denneanum</i>       | Jin X-H 10899           | KF177487 |
| <i>Dendrobium denneanum</i>       | Jin X-H 10840           | KF177488 |
| <i>Dendrobium denneanum</i>       | Jin X-H & Lai Y-J 11011 | KF177489 |
| <i>Dendrobium densiflorum</i>     | JH28-SH                 | FJ216480 |
| <i>Dendrobium densiflorum</i>     | MHSH-SH                 | FJ216487 |
| <i>Dendrobium densiflorum</i>     | SET-ET 1272             | KF177490 |
| <i>Dendrobium denudans</i>        | Jin X-H 8510            | KF177491 |
| <i>Dendrobium devonianum</i>      | JH25-SH                 | FJ216478 |
| <i>Dendrobium devonianum</i>      | Jin X-H 10302           | KF177492 |
| <i>Dendrobium devonianum</i>      | Jin X.H. 9902           | KJ174255 |
| <i>Dendrobium devonianum</i>      | Jin X.H. 11030          | KJ174256 |
| <i>Dendrobium devonianum</i>      | Jin X.H. 6947           | KJ174257 |
| <i>Dendrobium dixanthum</i>       | Jin X-H 13017           | KF177493 |
| <i>Dendrobium dixanthum</i>       | Jin X.H.107             | KJ174258 |
| <i>Dendrobium ellipsophyllum</i>  | Jin X-H 13066           | KF177494 |
| <i>Dendrobium exile</i>           | Jin X-H 10776           | KF177495 |
| <i>Dendrobium exile</i>           | Jin X-H 10780           | KF177496 |
| <i>Dendrobium falconeri</i>       | JH20-SH                 | FJ216475 |
| <i>Dendrobium falconeri</i>       | Jin X-H 8200            | KF177497 |
| <i>Dendrobium falconeri</i>       | Jin X.H.077             | KJ174259 |
| <i>Dendrobium falconeri</i>       | Jin X.H. 8977           | KJ174260 |
| <i>Dendrobium falcorostrum</i>    | JMB102                  | KC811580 |
| <i>Dendrobium fanjingshanense</i> | Jin X-H 10102           | KF177498 |
| <i>Dendrobium fanjingshanense</i> | Jin s.n. 13             | KF177499 |
| <i>Dendrobium fanjingshanense</i> | Jin X.H.078             | KJ174261 |
| <i>Dendrobium fanjingshanense</i> | Jin X.H.079             | KJ174262 |
| <i>Dendrobium fimbriatum</i>      | JH08-SH                 | FJ216468 |
| <i>Dendrobium fimbriatum</i>      | Jin s.n. 16             | KF177500 |
| <i>Dendrobium findleyanum</i>     | JH17-SH                 | FJ216473 |
| <i>Dendrobium findleyanum</i>     | Jin X-H 11875           | KF177501 |
| <i>Dendrobium gibsonii</i>        | JH10-SH                 | FJ216470 |
| <i>Dendrobium gracilicaule</i>    | JMB103                  | KC811569 |
| <i>Dendrobium gratiosissimum</i>  | JH16-SH                 | FJ216472 |

|                                                  |                          |          |
|--------------------------------------------------|--------------------------|----------|
| <i>Dendrobium gratiosissimum</i>                 | ZLJ07105                 | GQ153536 |
| <i>Dendrobium gratiosissimum</i>                 | Jin X-H 10781            | KF177503 |
| <i>Dendrobium gratiosissimum</i>                 | Jin X-H 10758            | KF177504 |
| <i>Dendrobium hancockii</i>                      | JH29-SH                  | FJ216481 |
| <i>Dendrobium hancockii</i>                      | Jin X-H 13492            | KF177506 |
| <i>Dendrobium hancockii</i>                      | Jin X.H.109              | KJ174263 |
| <i>Dendrobium harveyanum</i>                     | JH05-SH                  | EU887928 |
| <i>Dendrobium harveyanum</i>                     | Jin X-H 10760            | KF177507 |
| <i>Dendrobium harveyanum</i>                     | Jin X.H. 10703           | KJ174264 |
| <i>Dendrobium henanense</i>                      | Jin X-H 9772             | KF177508 |
| <i>Dendrobium henanense</i>                      | Jin X.H. 9235            | KJ174265 |
| <i>Dendrobium henryi</i>                         | YN-ET 990                | KF177509 |
| <i>Dendrobium henryi</i>                         | Jin X.H. 11048           | KJ174268 |
| <i>Dendrobium henryi</i>                         | Jin X.H. 11822           | KJ174269 |
| <i>Dendrobium hercoglossum</i>                   | Jin X-H 10109            | KF177510 |
| <i>Dendrobium hercoglossum</i>                   | Jin X-H 17               | KF177511 |
| <i>Dendrobium hercoglossum</i>                   | Jin X.H. 9522            | KJ174270 |
| <i>Dendrobium heterocarpum</i>                   | JH15-SH                  | FJ216471 |
| <i>Dendrobium heterocarpum</i>                   | Jin X-H 12014            | KF177512 |
| <i>Dendrobium hookerianum</i>                    | SET-ET 1137              | KF177513 |
| <i>Dendrobium hookerianum</i>                    | Jin X-H 10367            | KF177514 |
| <i>Dendrobium hookerianum</i>                    | Jin X.H. 9102            | KJ174272 |
| <i>Dendrobium huoshanense</i>                    | Jin X-H 9768             | KF177515 |
| <i>Dendrobium infundibulum</i>                   | Jin X-H 11877            | KF177516 |
| <i>Dendrobium jenkinsii</i>                      | JH33-SH                  | FJ216484 |
| <i>Dendrobium jenkinsii</i>                      | Jin X-H 10709            | KF177517 |
| <i>Dendrobium jenkinsii</i>                      | Jin s.n. 4               | KF177518 |
| <i>Dendrobium jonesii</i>                        | MELU JMB154              | KC811570 |
| <i>Dendrobium kingianum subsp. Carnarvonense</i> | JMB132                   | KC811593 |
| <i>Dendrobium kingianum subsp. kingianum</i>     | JMB136                   | KC811594 |
| <i>Dendrobium lindleyi</i>                       | USBG 99-2351             | GQ248286 |
| <i>Dendrobium lituiflorum</i>                    | JH24-SH                  | FJ216477 |
| <i>Dendrobium loddigesii</i>                     | JH35-SH                  | EU887940 |
| <i>Dendrobium loddigesii</i>                     | Jin s.n. 15              | KF177520 |
| <i>Dendrobium lohohense</i>                      | Jin X-H 9769             | KF177521 |
| <i>Dendrobium longicornu</i>                     | SET-ET 1347              | KF177522 |
| <i>Dendrobium longicornu</i>                     | Kurzweil H & Lwin S 2647 | KF177523 |
| <i>Dendrobium longicornu</i>                     | Jin X-H 11663            | KF177524 |
| <i>Dendrobium menglaense</i>                     | Jin X-H 10464            | KF177525 |
| <i>Dendrobium minutiflorum</i>                   | Jin X-H 10468            | KF177526 |
| <i>Dendrobium minutiflorum</i>                   | Jin X-H 6979             | KF177527 |
| <i>Dendrobium moniliforme</i>                    | PDBK2007-0736            | KC704360 |
| <i>Dendrobium moniliforme</i>                    | PDBK2007-0737            | KC704361 |
| <i>Dendrobium moniliforme</i>                    | Jin X-H 8960             | KF177528 |
| <i>Dendrobium moniliforme</i>                    | in X-H 8957              | KF177529 |
| <i>Dendrobium moniliforme</i>                    | Jin X-H 10895            | KF177530 |
| <i>Dendrobium moniliforme</i>                    | Jin X.H.087              | KJ174273 |
| <i>Dendrobium moniliforme</i>                    | Jin X.H. 10080           | KJ174274 |
| <i>Dendrobium moniliforme</i>                    | Jin X.H.088              | KJ174275 |
| <i>Dendrobium moniliforme</i>                    | Jin X.H.089              | KJ174276 |
| <i>Dendrobium moniliforme</i>                    | Jin X.H.090              | KJ174277 |
| <i>Dendrobium moniliforme</i>                    | Jin X.H. 8999            | KJ174278 |
| <i>Dendrobium moniliforme</i>                    | Jin X.H. 6976            | KJ174279 |
| <i>Dendrobium moniliforme</i>                    | Jin X.H.091              | KJ174280 |

|                                                |                          |          |
|------------------------------------------------|--------------------------|----------|
| <i>Dendrobium moniliforme</i>                  | Jin X.H. 10921           | KJ174281 |
| <i>Dendrobium moniliforme</i>                  | Jin X.H.092              | KJ174282 |
| <i>Dendrobium monophyllum</i>                  | JMB172                   | KC811572 |
| <i>Dendrobium moorei</i>                       | JMB155                   | KC811568 |
| <i>Dendrobium moschatum</i>                    | Jin X-H 11886            | KF177531 |
| <i>Dendrobium nindii</i>                       | JMB190                   | KC811578 |
| <i>Dendrobium nobile</i>                       | 22-8                     | GU458312 |
| <i>Dendrobium nobile</i>                       | 23-3                     | GU458313 |
| <i>Dendrobium nobile</i>                       | 24-2                     | GU458314 |
| <i>Dendrobium nobile</i>                       | 25-1                     | GU458315 |
| <i>Dendrobium nobile</i>                       | 26-1                     | GU458316 |
| <i>Dendrobium nobile</i>                       | 27-6                     | GU458317 |
| <i>Dendrobium nobile</i>                       | 28-1                     | GU458318 |
| <i>Dendrobium nobile</i>                       | 29-6                     | GU458319 |
| <i>Dendrobium nobile</i>                       | 32-7                     | GU458320 |
| <i>Dendrobium nobile</i>                       | 35-4                     | GU458321 |
| <i>Dendrobium nobile</i>                       | ST-ET 1990               | KF177532 |
| <i>Dendrobium nobile</i>                       | SET-ET 1143              | KF177533 |
| <i>Dendrobium nobile</i>                       | KL2761                   | KJ174283 |
| <i>Dendrobium nobile</i>                       | Jin X.H. 10759           | KJ174284 |
| <i>Dendrobium nobile</i>                       | Jin X.H.093              | KJ174285 |
| <i>Dendrobium officinale</i>                   | JH26-SH                  | FJ216479 |
| <i>Dendrobium officinale</i>                   | ZLJ06019                 | GQ153537 |
| <i>Dendrobium officinale</i>                   | Jin s.n. 11              | KF177476 |
| <i>Dendrobium officinale</i>                   | Jin s.n. 12              | KF177477 |
| <i>Dendrobium officinale</i>                   | Jin s.n. 1               | KF177478 |
| <i>Dendrobium officinale</i>                   | Jin s.n. 2               | KF177479 |
| <i>Dendrobium parciflorum</i>                  | HNSH-SH                  | EU887943 |
| <i>Dendrobium parciflorum</i>                  | Jin X-H 10113            | KF177505 |
| <i>Dendrobium pendulum</i>                     | JH14-SH                  | EU887933 |
| <i>Dendrobium pendulum</i>                     | Jin s.n. 6               | KF177535 |
| <i>Dendrobium pendulum</i>                     | Jin s.n. 7               | KF177536 |
| <i>Dendrobium pendulum</i>                     | Jin X-H 8064             | KF177537 |
| <i>Dendrobium porphyrochilum</i>               | Jin X-H 7033             | KF177539 |
| <i>Dendrobium porphyrochilum</i>               | Jin X-H 11880            | KF177540 |
| <i>Dendrobium primulinum</i>                   | JH22-SH                  | EU887936 |
| <i>Dendrobium primulinum</i>                   | SMBC-SH                  | EU887937 |
| <i>Dendrobium primulinum</i>                   | ZLJ06512                 | GQ153535 |
| <i>Dendrobium primulinum</i>                   | Jin X-H 10793            | KF177538 |
| <i>Dendrobium pulchellum</i>                   | Jin X-H 11878            | KF177541 |
| <i>Dendrobium racemosum</i>                    | JMB18                    | KC811573 |
| <i>Dendrobium ruckeri</i>                      | Kurzweil H & Lwin S 2536 | KF177542 |
| <i>Dendrobium ruckeri</i>                      | Kurzweil H & Lwin S 2545 | KF177543 |
| <i>Dendrobium salaccense</i>                   | Jin X-H 9284             | KF177544 |
| <i>Dendrobium salaccense</i>                   | Jin X-H 7760             | KF177545 |
| <i>Dendrobium schoeninum</i>                   | JMB91                    | KC811574 |
| <i>Dendrobium scoriarum</i>                    | Jin X-H 13569            | KF177546 |
| <i>Dendrobium senile</i>                       | Jin s.n. 8               | KF177547 |
| <i>Dendrobium sinense</i>                      | Jin X-H 10131            | KF177548 |
| <i>Dendrobium sinense</i>                      | Jin X-H 9328             | KF177549 |
| <i>Dendrobium speciosum var. blackdownense</i> | JMB147                   | KC811561 |
| <i>Dendrobium speciosum var. boreale</i>       | JMB149                   | KC811565 |
| <i>Dendrobium speciosum var. boreale</i>       | JMB236                   | KC811581 |
| <i>Dendrobium speciosum var. boreale</i>       | JMB280                   | KC811586 |

|                                                          |               |          |
|----------------------------------------------------------|---------------|----------|
| <i>Dendrobium speciosum</i> var. <i>boreale</i>          | JMB237        | KC811588 |
| <i>Dendrobium speciosum</i> var. <i>boreale</i>          | JMB257        | KC811590 |
| <i>Dendrobium speciosum</i> var. <i>capricornicum</i>    | JMB148        | KC811553 |
| <i>Dendrobium speciosum</i> var. <i>capricornicum</i>    | JMB279        | KC811582 |
| <i>Dendrobium speciosum</i> var. <i>capricornicum</i>    | JMB282        | KC811584 |
| <i>Dendrobium speciosum</i> var. <i>capricornicum</i>    | JMB281        | KC811585 |
| <i>Dendrobium speciosum</i> var. <i>carnavonense</i>     | JMB146        | KC811562 |
| <i>Dendrobium speciosum</i> var. <i>curvicaule</i>       | JMB235        | KC811563 |
| <i>Dendrobium speciosum</i> var. <i>curvicaule</i>       | JMB239        | KC811589 |
| <i>Dendrobium speciosum</i> var. <i>grandiflorum</i>     | JMB141        | KC811560 |
| <i>Dendrobium speciosum</i> var. <i>hillii</i>           | JMB140        | KC811558 |
| <i>Dendrobium speciosum</i> var. <i>pedunculatum</i>     | JMB166        | KC811564 |
| <i>Dendrobium speciosum</i> var. <i>pedunculatum</i>     | JMB267        | KC811591 |
| <i>Dendrobium speciosum</i> var. <i>speciosum</i>        | JMB139        | KC811559 |
| <i>Dendrobium strongylanthum</i>                         | Jin X-H 9499  | KF177552 |
| <i>Dendrobium strongylanthum</i>                         | ST-ET 1865    | KF177553 |
| <i>Dendrobium stuposum</i>                               | JH18-SH       | FJ216474 |
| <i>Dendrobium stuposum</i>                               | Jin X-H 7027  | KF177554 |
| <i>Dendrobium sulcatum</i>                               | Jin X-H 11879 | KF177555 |
| <i>Dendrobium tetragonum</i> var. <i>cacatua</i>         | JMB23         | KC811554 |
| <i>Dendrobium tetragonum</i> var. <i>cataractarum</i>    | JMB283        | KC811587 |
| <i>Dendrobium tetragonum</i> var. <i>giganteum</i>       | JMB42         | KC811557 |
| <i>Dendrobium tetragonum</i> var. <i>melaleucaphilum</i> | JMB48         | KC811556 |
| <i>Dendrobium tetragonum</i> var. <i>tetragonum</i>      | JMB69         | KC811555 |
| <i>Dendrobium tetragonum</i> var. <i>tetragonum</i>      | JMB284        | KC811583 |
| <i>Dendrobium thyrsoflorum</i>                           | JH06-SH       | EU887929 |
| <i>Dendrobium thyrsoflorum</i>                           | Jin X-H 10755 | KF177557 |
| <i>Dendrobium transparens</i>                            | Jin X-H 11046 | KF177558 |
| <i>Dendrobium trigonopus</i>                             | JH07-SH       | FJ216467 |
| <i>Dendrobium trigonopus</i>                             | Jin X-H 10750 | KF177559 |
| <i>Dendrobium trigonopus</i>                             | Jin X-H 10718 | KF177560 |
| <i>Dendrobium wangliangii</i>                            | Hu G-W 24479  | KF177561 |
| <i>Dendrobium wardianum</i>                              | JH12-SH       | EU887930 |
| <i>Dendrobium wardianum</i>                              | SMDBQ         | EU887931 |
| <i>Dendrobium wattii</i>                                 | Jin X-H 11817 | KF177562 |
| <i>Dendrobium williamsonii</i>                           | JH04-SH       | EU887927 |
| <i>Dendrobium wilsonii</i>                               | Jin X-H 9778  | KF177563 |
| <i>Dendrobium xichouense</i>                             | Jin s.n. 14   | KF177564 |
| <i>Liparis kumokiri</i>                                  | PDBK2010-1480 | KC704380 |

**Table S3** Gradient evaluation of ITS+matK in *Dendrobium*.

| No. of species | Success rate of identifying species (%) |
|----------------|-----------------------------------------|
| 5              | 100                                     |
| 17             | 94.12                                   |
| 36             | 91.66                                   |
| 52             | 78.85                                   |
| 60             | 80                                      |
| 70             | 80                                      |
| 80             | 77.5                                    |
| 91             | 79.12                                   |

**Table S4** Summary of species identification success rate based on distance method, NJ tree and the programme TaxonDNA in *Paphiopedilum*.

|                              |           | <i>matK</i> | ITS+ <i>matK</i> |
|------------------------------|-----------|-------------|------------------|
| Ability to discriminate (NJ) |           | 100         | 100              |
| Intraspecific distances (%)  | Minimum   | 0           | 0                |
|                              | Maximum   | 0.08        | 0.04             |
|                              | Mean      | 0.119       | 0.006            |
| Interspecific distances (%)  | Minimum   | 0.2         | 0.1              |
|                              | Maximum   | 1.3         | 2.8              |
|                              | Mean      | 0.8         | 2.1              |
| Best match                   | Correct   | 96.55       | 96.55            |
|                              | Ambiguous | 0           | 0                |
|                              | Incorrect | 3.44        | 3.44             |
| Best close match             | Correct   | 96.55       | 96.55            |
|                              | Ambiguous | 0           | 0                |
|                              | Incorrect | 3.44        | 3.44             |
| All species barcodes         | Correct   | 89.65       | 89.65            |
|                              | Ambiguous | 6.89        | 6.89             |
|                              | Incorrect | 3.44        | 3.44             |

**Table S5** Summary of species identification success rate based on distance method, NJ tree and the programme TaxonDNA in *Ficus*.

|                              |           | ITS   | ITS+ <i>matK</i> |
|------------------------------|-----------|-------|------------------|
| Ability to discriminate (NJ) |           | 59.32 | 62.71            |
| Intraspecific distances (%)  | Minimum   | 0     | 0                |
|                              | Maximum   | 1.18  | 0.67             |
|                              | Mean      | 0.16  | 0.12             |
| Interspecific distances (%)  | Minimum   | 0     | 0                |
|                              | Maximum   | 9.3   | 4.8              |
|                              | Mean      | 4.4   | 2.4              |
| Best match                   | Correct   | 84.81 | 84.81            |
|                              | Ambiguous | 7.85  | 5.23             |
|                              | Incorrect | 7.32  | 9.94             |
| Best close match             | Correct   | 84.81 | 84.81            |
|                              | Ambiguous | 7.85  | 5.23             |
|                              | Incorrect | 7.32  | 9.94             |
| All species barcodes         | Correct   | 73.29 | 63.34            |
|                              | Ambiguous | 23.03 | 34.03            |
|                              | Incorrect | 3.66  | 2.61             |

**Table S6** Summary of species identification success rate based on distance method, NJ tree and the programme TaxonDNA in *Pedicularis*.

|                              |           | ITS   | ITS+ <i>matK</i> |
|------------------------------|-----------|-------|------------------|
| Ability to discriminate (NJ) |           | 70.93 | 76.74            |
| Intraspecific distances (%)  | Minimum   | 0     | 0                |
|                              | Maximum   | 2.28  | 1.59             |
|                              | Mean      | 0.46  | 0.33             |
| Interspecific distances (%)  | Minimum   | 0.1   | 0.2              |
|                              | Maximum   | 14.7  | 8.3              |
|                              | Mean      | 6.4   | 4.4              |
| Best match                   | Correct   | 89.68 | 91.25            |
|                              | Ambiguous | 3.12  | 2.18             |
|                              | Incorrect | 7.18  | 6.56             |
| Best close match             | Correct   | 89.68 | 91.25            |
|                              | Ambiguous | 3.12  | 2.18             |
|                              | Incorrect | 7.18  | 6.56             |
| All species barcodes         | Correct   | 64.06 | 66.56            |
|                              | Ambiguous | 34.37 | 31.56            |
|                              | Incorrect | 1.56  | 1.87             |



**Table S7** Summary of species identification success rate based on distance method, NJ tree and the programme TaxonDNA in *Lysimachia*.

|                              |           | ITS+ <i>matK</i> + <i>rbcl</i> | ITS+ <i>matK</i> |
|------------------------------|-----------|--------------------------------|------------------|
| Ability to discriminate (NJ) |           | 87.5                           | 87.5             |
| Intraspecific distances (%)  | Minimum   | 0                              | 0                |
|                              | Maximum   | 1.86                           | 2.41             |
|                              | Mean      | 0.37                           | 0.39             |
| Interspecific distances (%)  | Minimum   | 0.3                            | 0                |
|                              | Maximum   | 7.9                            | 11.2             |
|                              | Mean      | 4.4                            | 6.2              |
| Best match                   | Correct   | 93.2                           | 93.2             |
|                              | Ambiguous | 0                              | 0                |
|                              | Incorrect | 6.8                            | 6.8              |
| Best close match             | Correct   | 93.2                           | 93.2             |
|                              | Ambiguous | 0                              | 0                |
|                              | Incorrect | 6.8                            | 6.8              |
| All species barcodes         | Correct   | 46.06                          | 43.82            |
|                              | Ambiguous | 47.19                          | 50.56            |
|                              | Incorrect | 5.61                           | 3.37             |

**Table S2** Wilcoxon signed-rank tests of intra- and inter-specific divergence among 5 single loci.

| Markers     |                  | intra-specific divergence |                                | inter-specific divergence |                                |
|-------------|------------------|---------------------------|--------------------------------|---------------------------|--------------------------------|
|             |                  | <i>P</i> value            | Result                         | <i>P</i> value            | Result                         |
| ITS         | ITS2             | 0.001                     | ITS2>ITS                       | 0                         | ITS2>ITS                       |
| ITS         | <i>matK</i>      | 0                         | ITS> <i>matK</i>               | 0                         | ITS> <i>matK</i>               |
| ITS         | <i>rbcL</i>      | 0                         | ITS> <i>rbcL</i>               | 0                         | ITS> <i>rbcL</i>               |
| ITS         | <i>trnH-psbA</i> | 0.006                     | ITS> <i>trnH-psbA</i>          | 0                         | ITS> <i>trnH-psbA</i>          |
| ITS2        | <i>matK</i>      | 0                         | ITS2> <i>matK</i>              | 0                         | ITS2> <i>matK</i>              |
| ITS2        | <i>rbcL</i>      | 0                         | ITS2> <i>rbcL</i>              | 0                         | ITS2> <i>rbcL</i>              |
| ITS2        | <i>trnH-psbA</i> | 0.005                     | ITS2> <i>trnH-psbA</i>         | 0                         | ITS2> <i>trnH-psbA</i>         |
| <i>matK</i> | <i>rbcL</i>      | 0.809                     | <i>matK</i> = <i>rbcL</i>      | 0                         | <i>matK</i> > <i>rbcL</i>      |
| <i>matK</i> | <i>trnH-psbA</i> | 0.055                     | <i>matK</i> = <i>trnH-psbA</i> | 0                         | <i>matK</i> > <i>trnH-psbA</i> |
| <i>rbcL</i> | <i>trnH-psbA</i> | 0.133                     | <i>rbcL</i> = <i>trnH-psbA</i> | 0                         | <i>rbcL</i> > <i>trnH-psbA</i> |

Figure S1

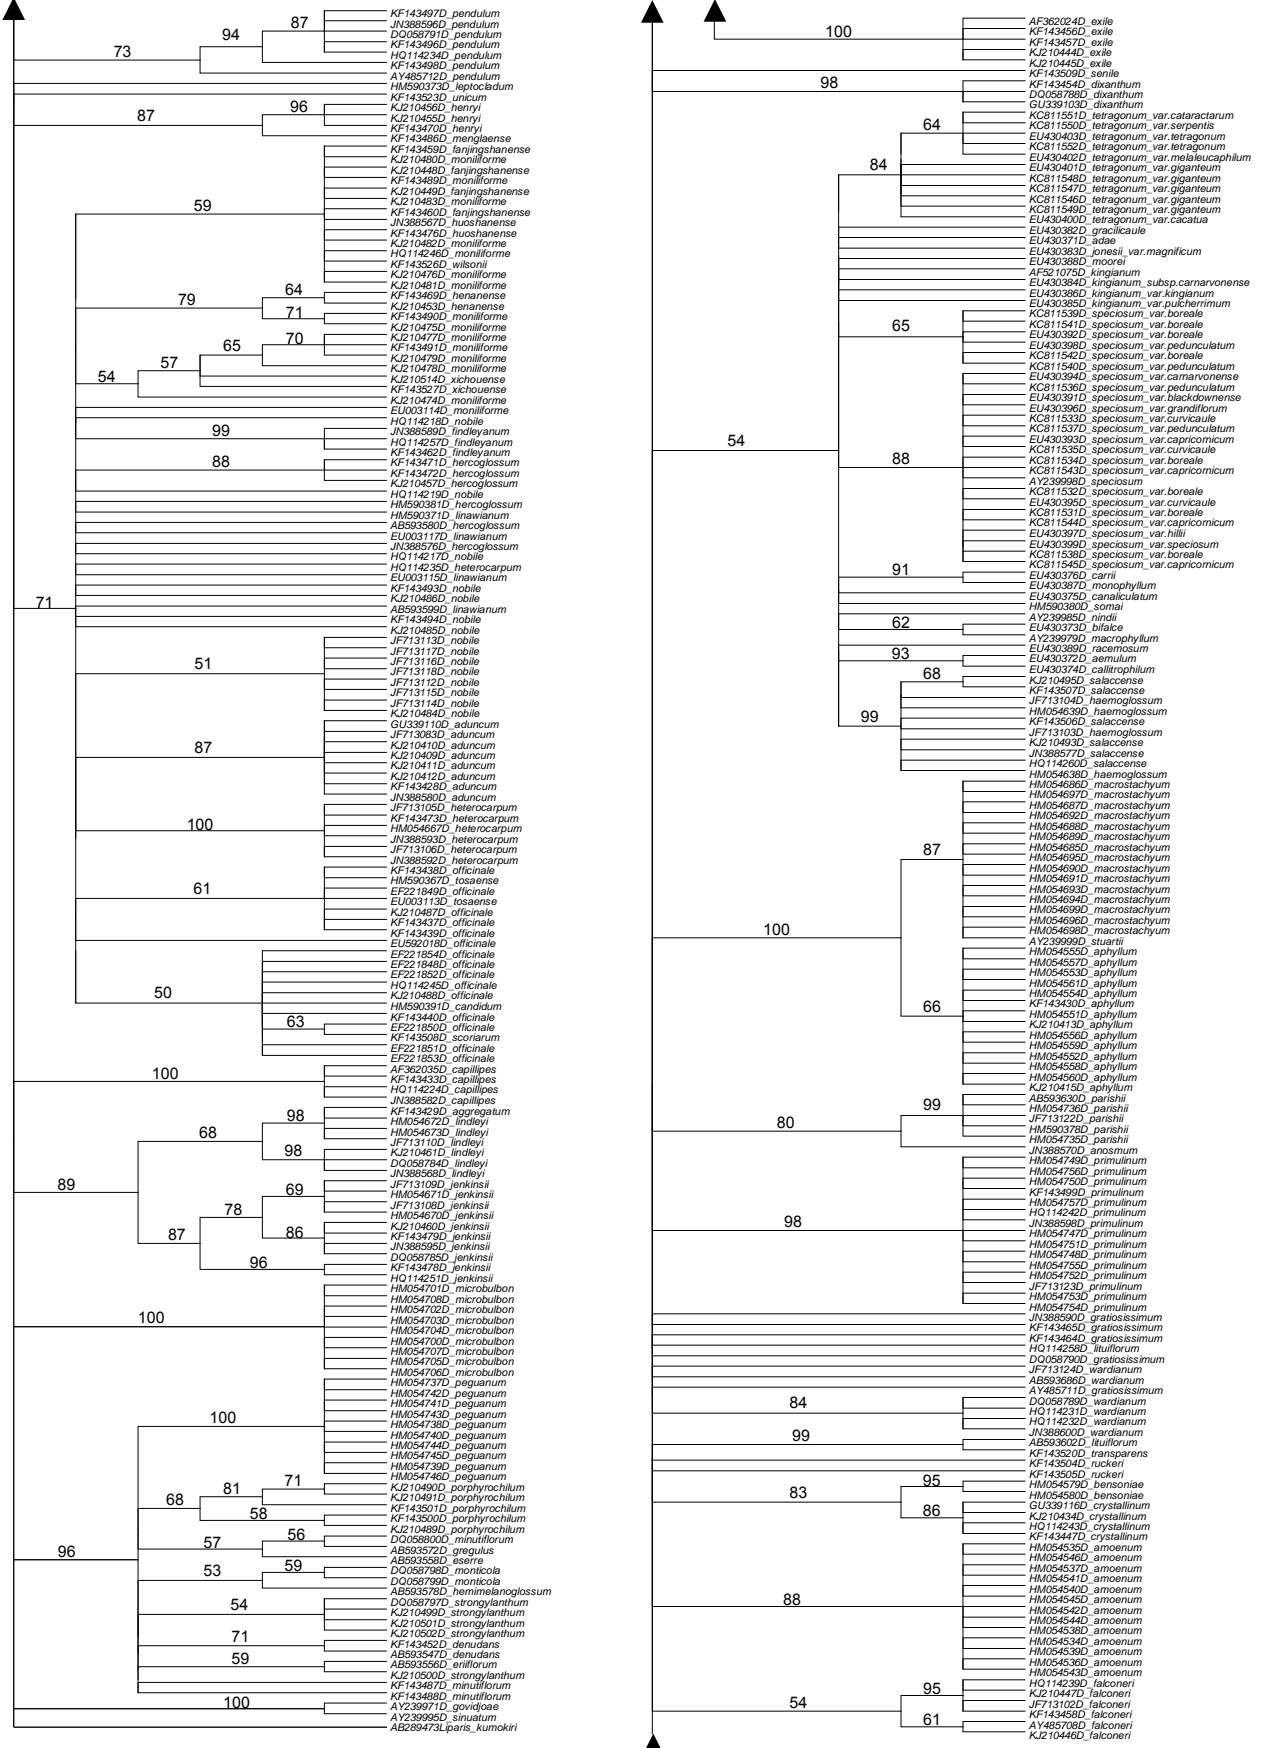

Figure S1(continued)

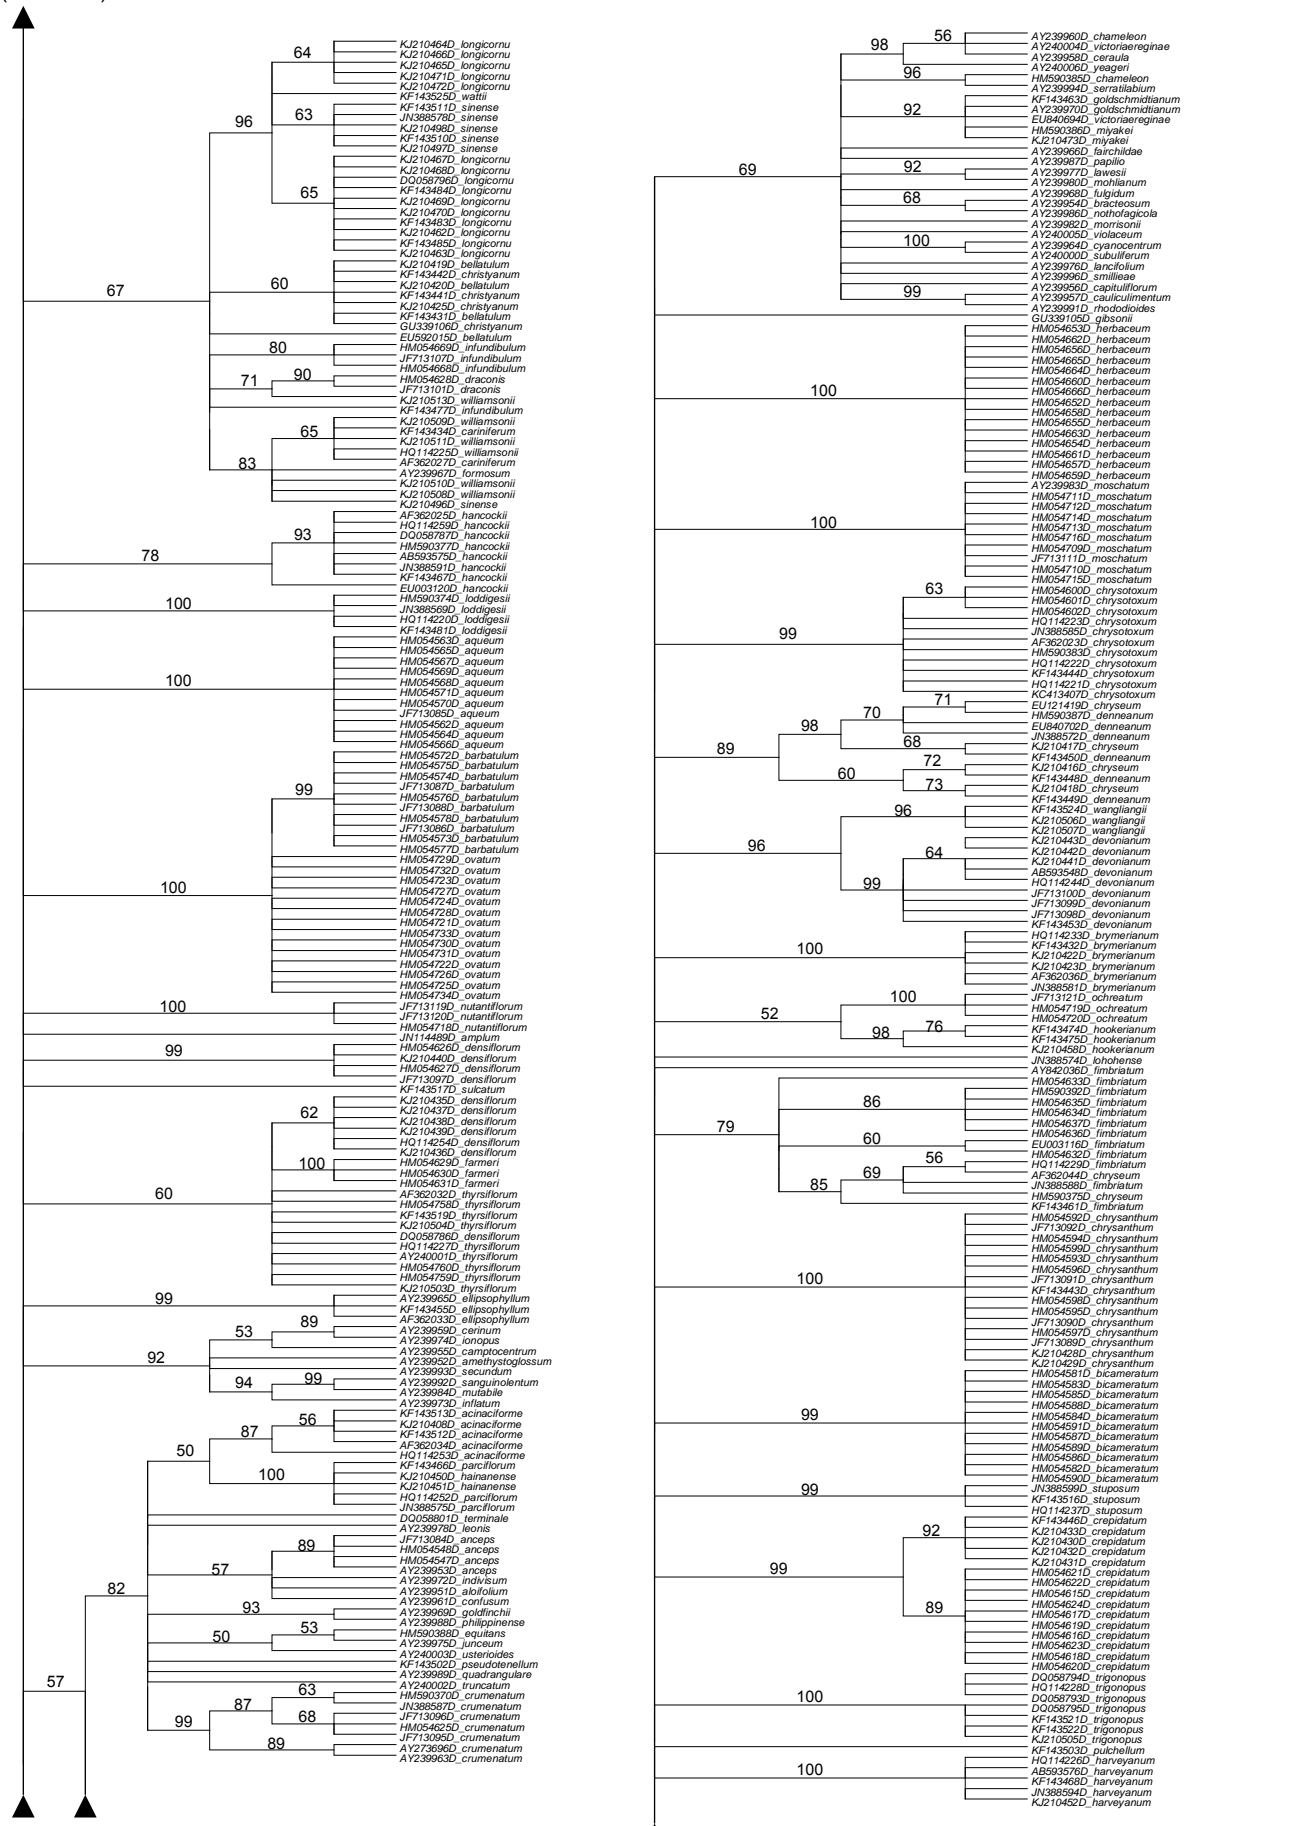

Figure S2

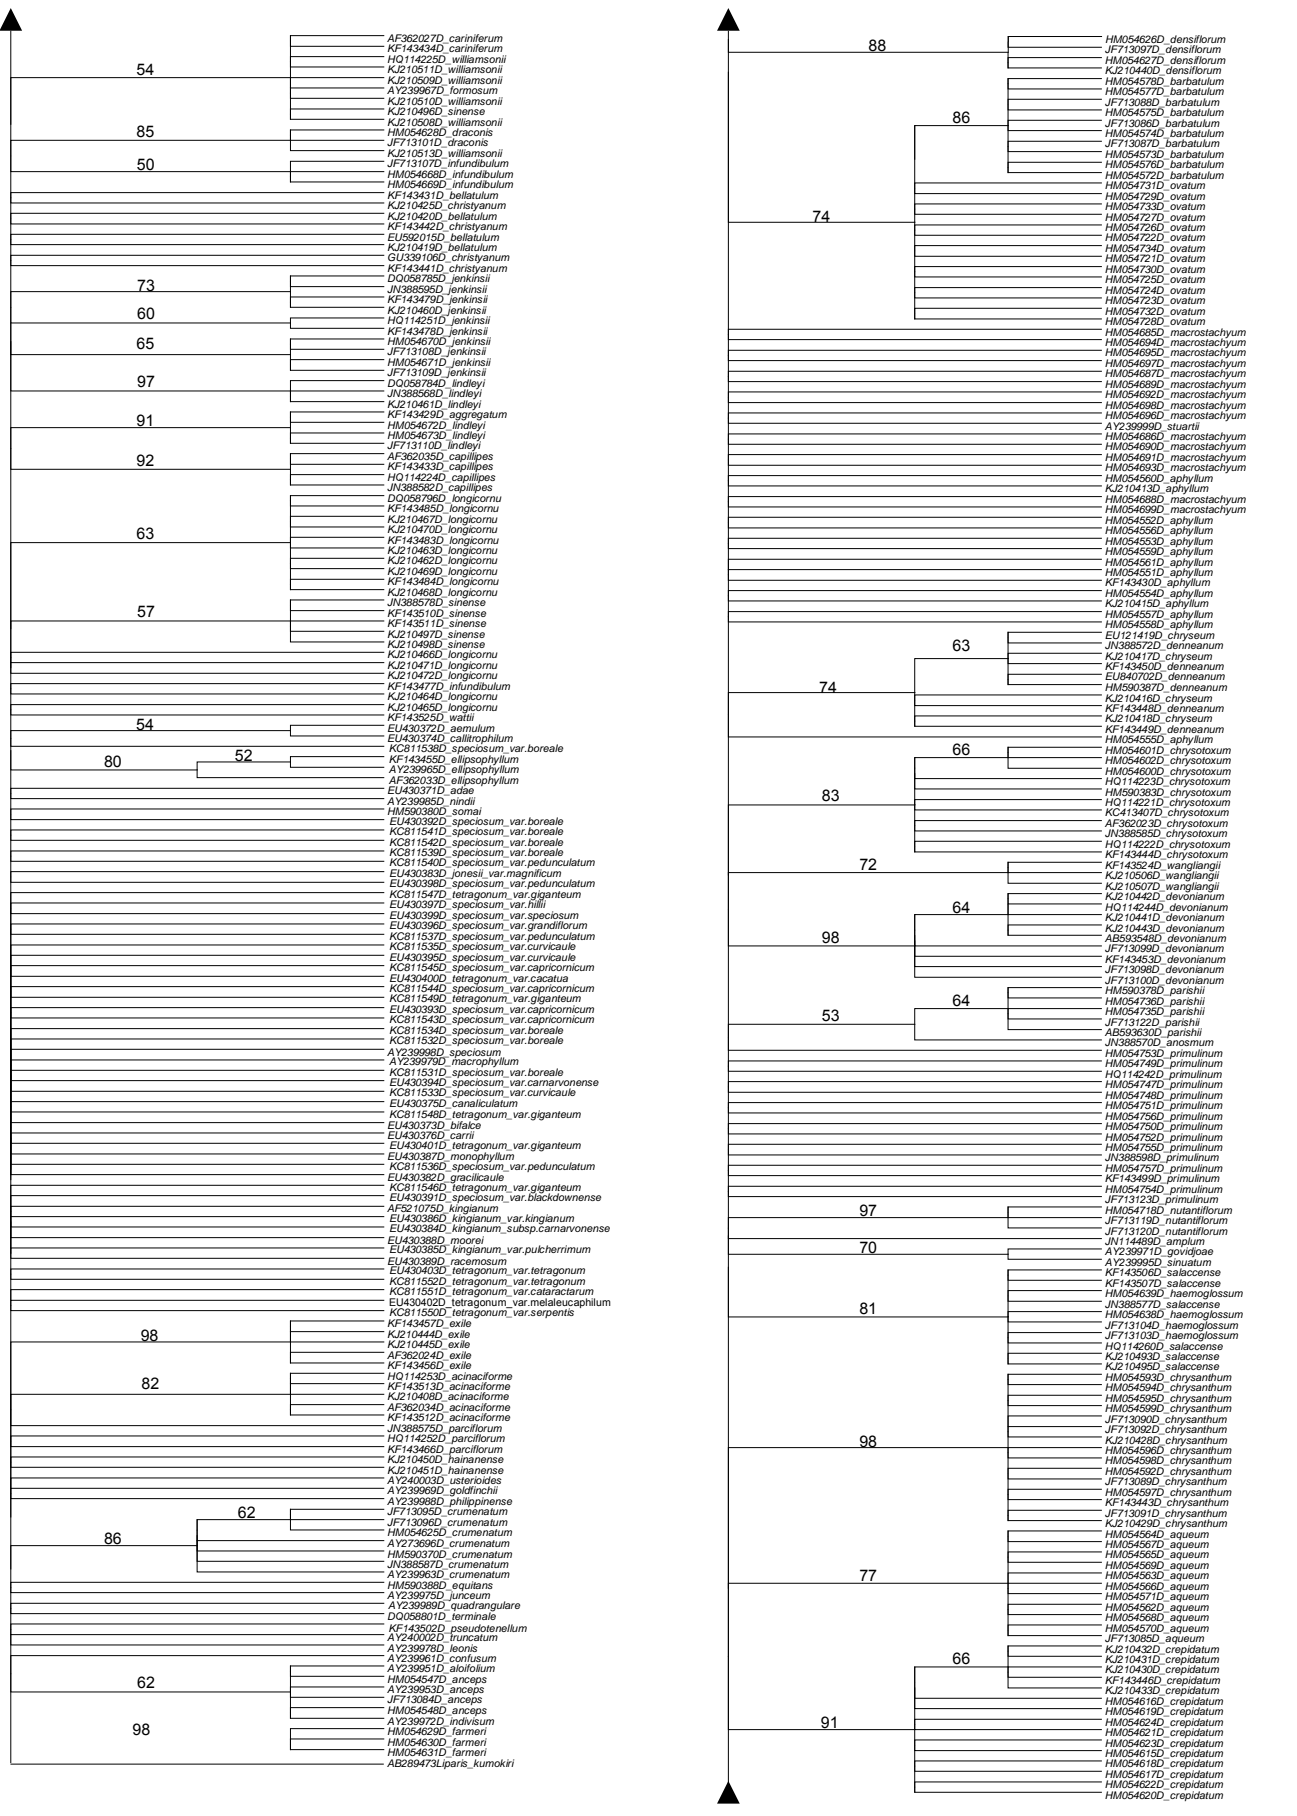

Figure S2(continued)

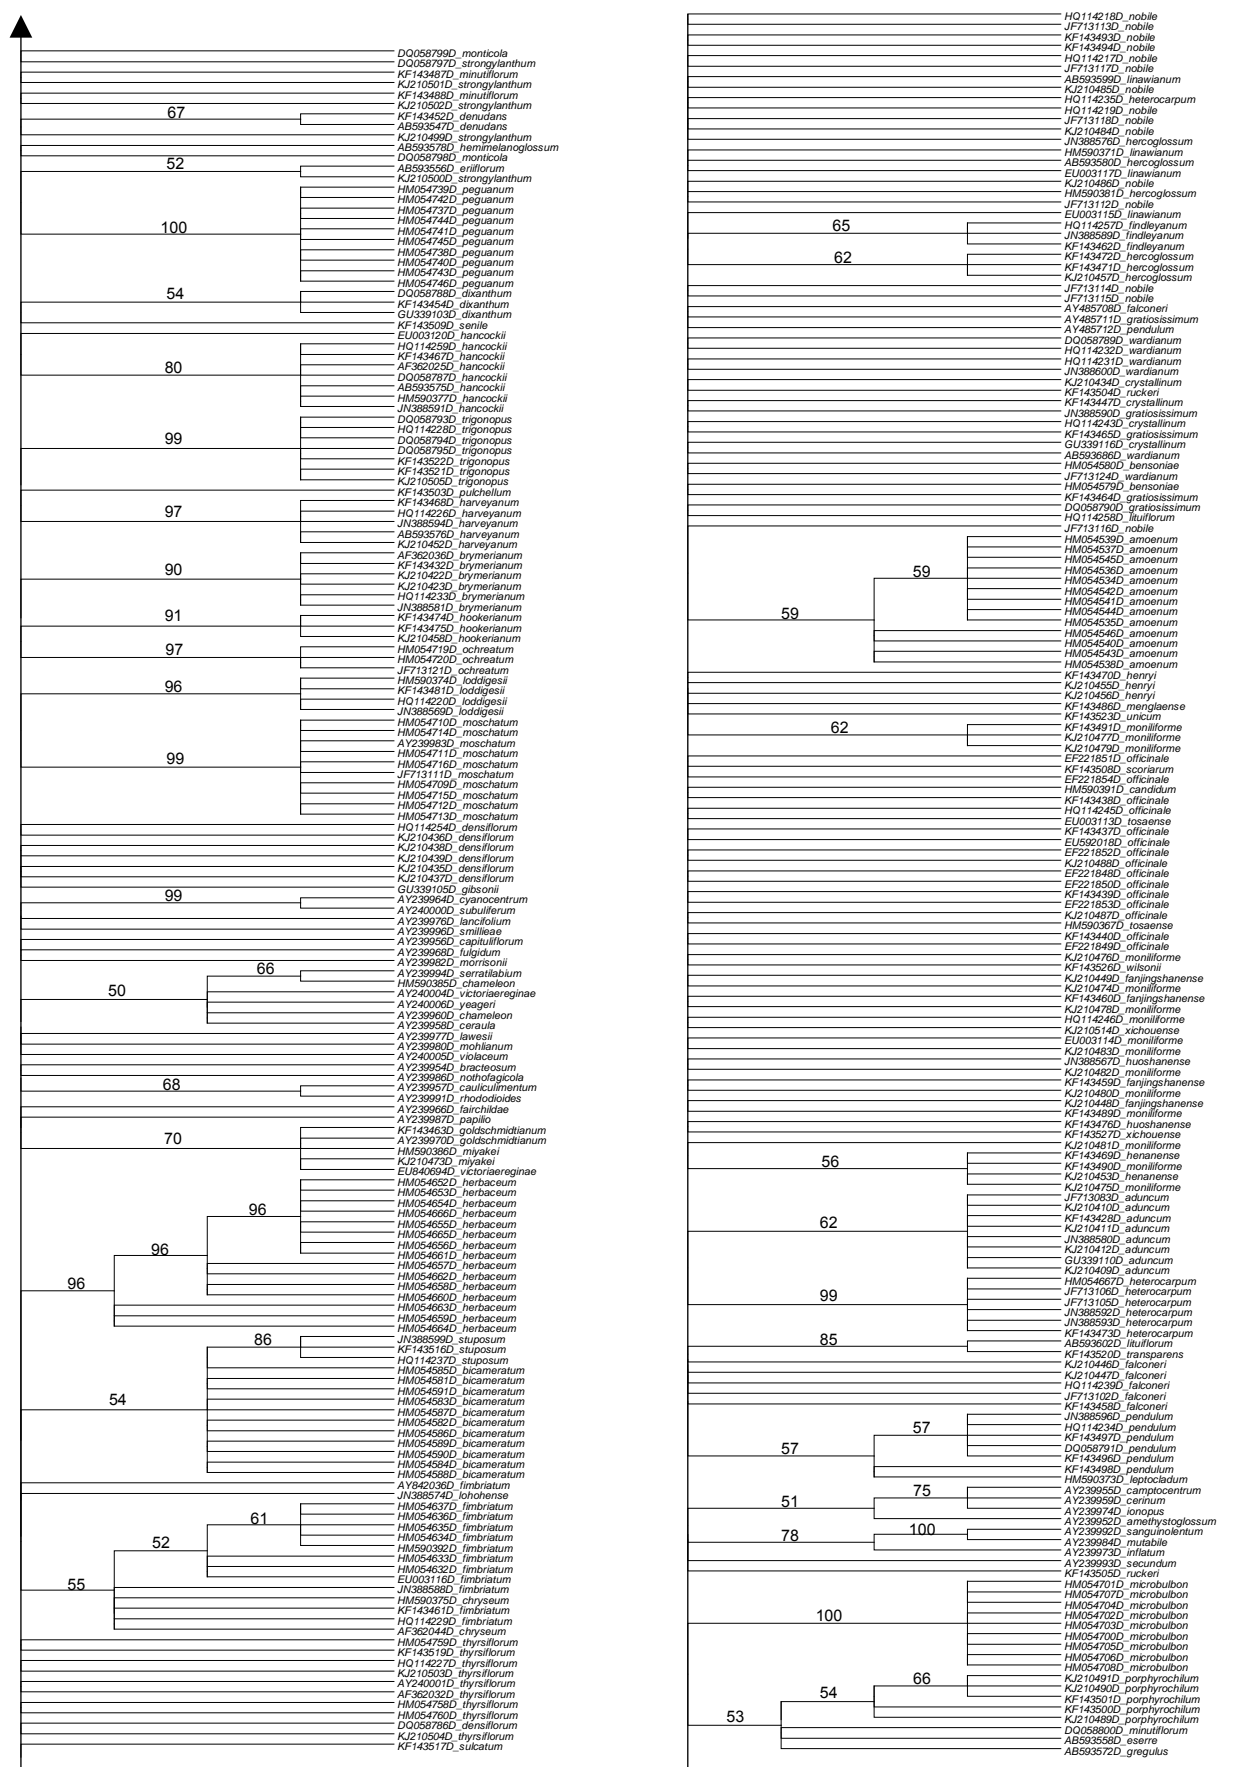



Figure S3

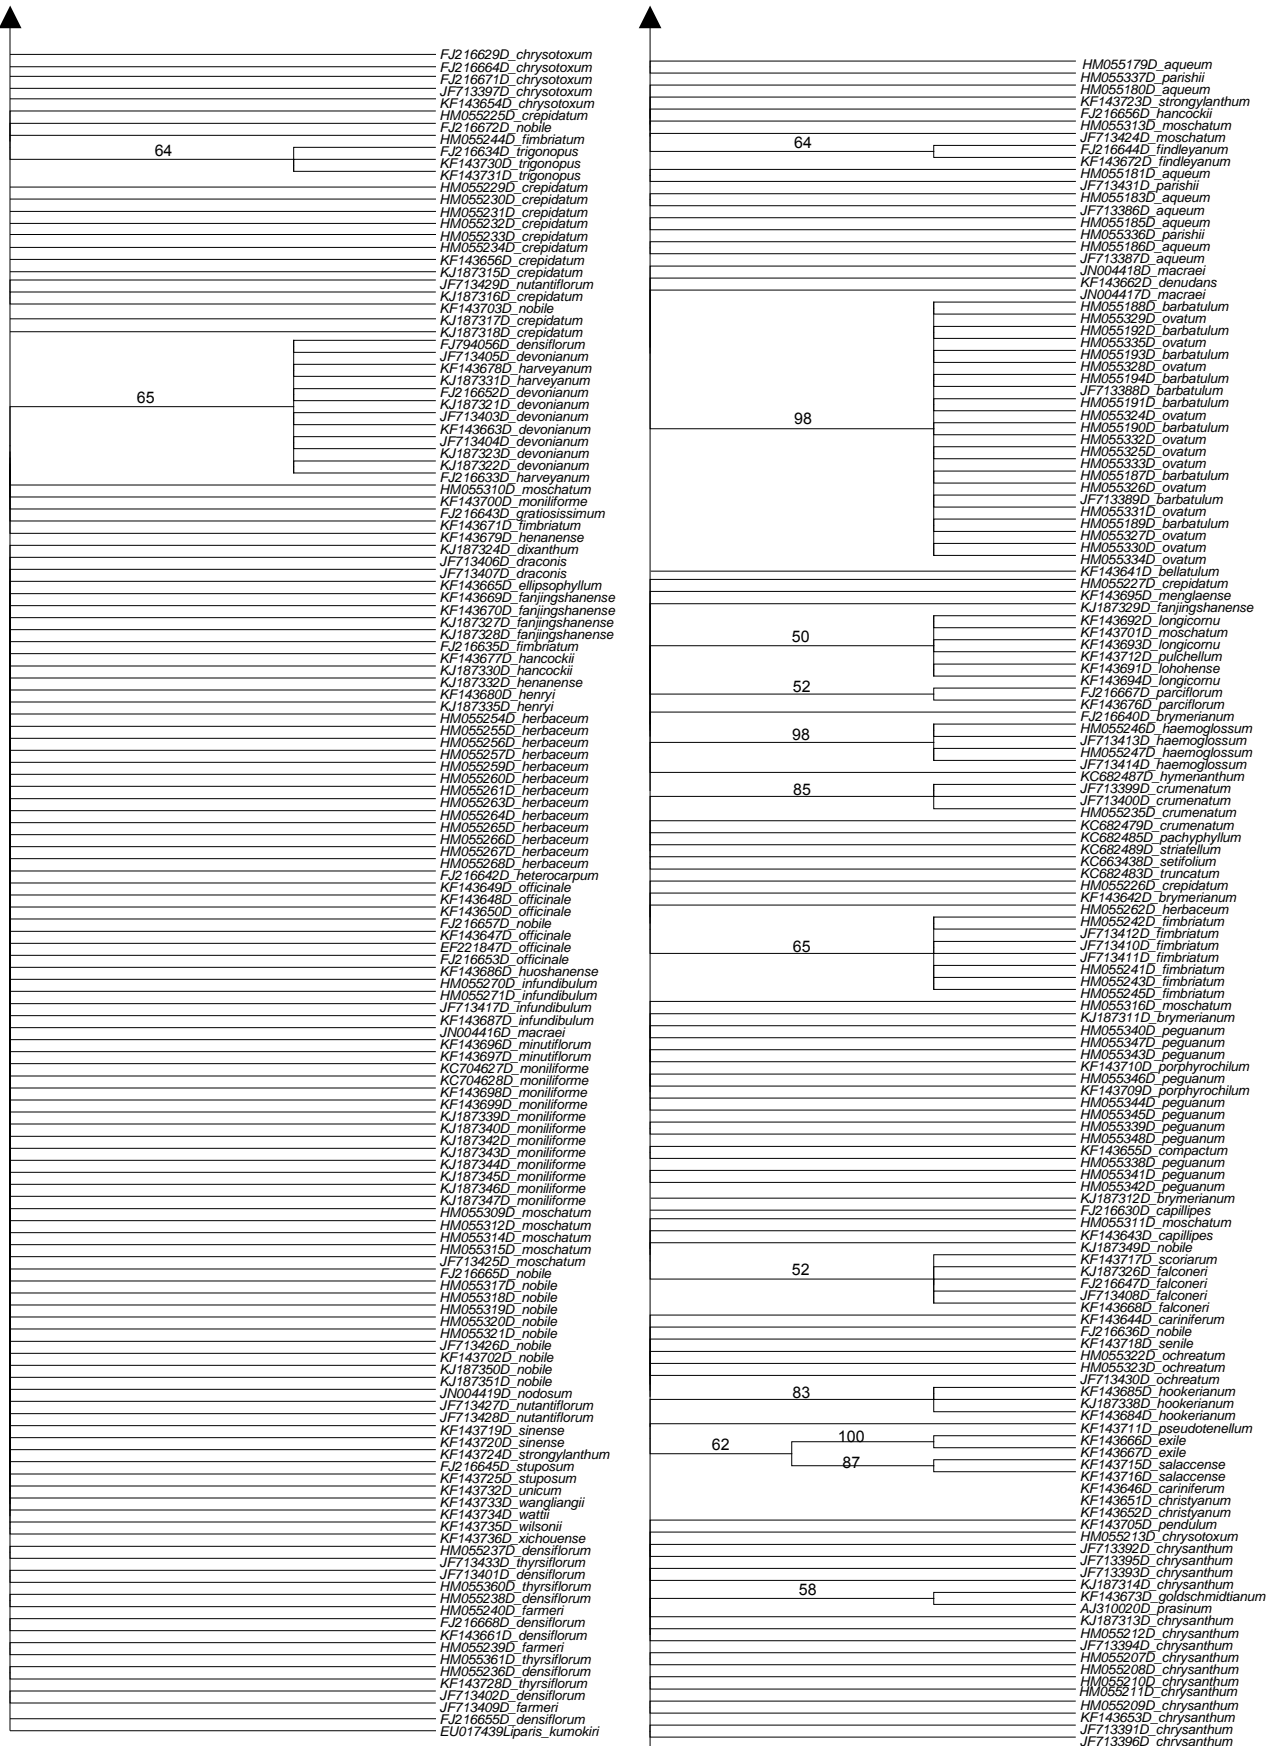

Figure S3 (continued)

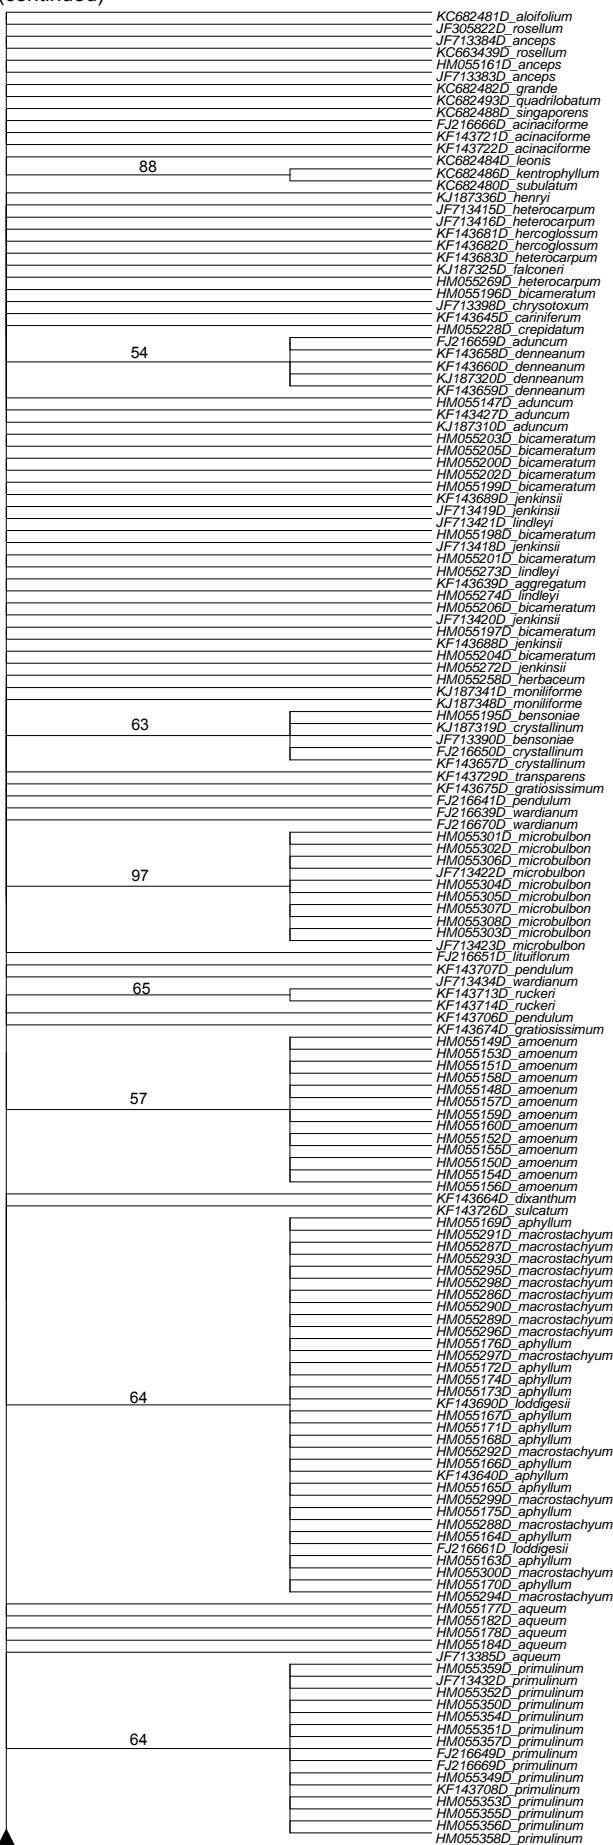

Figure S4

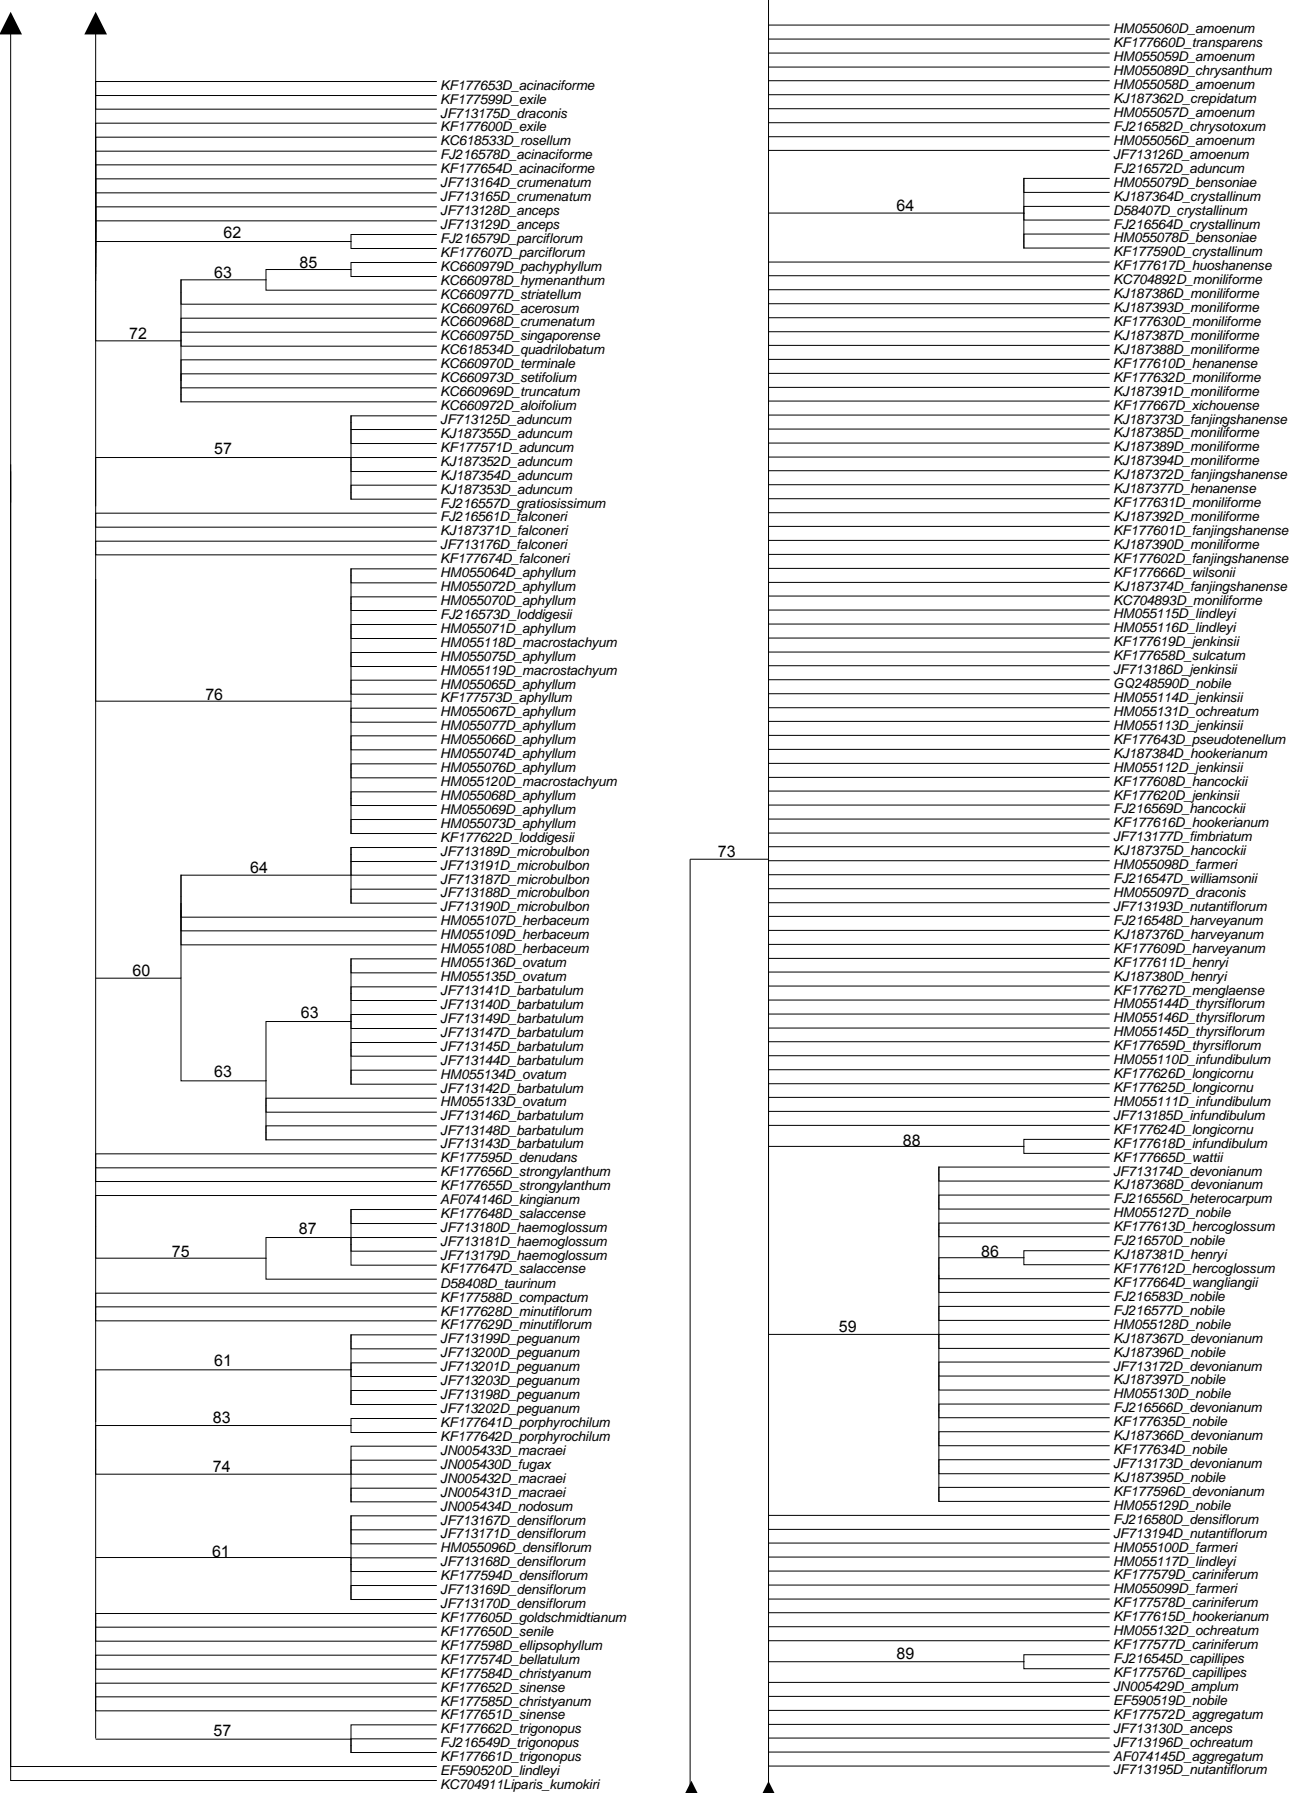

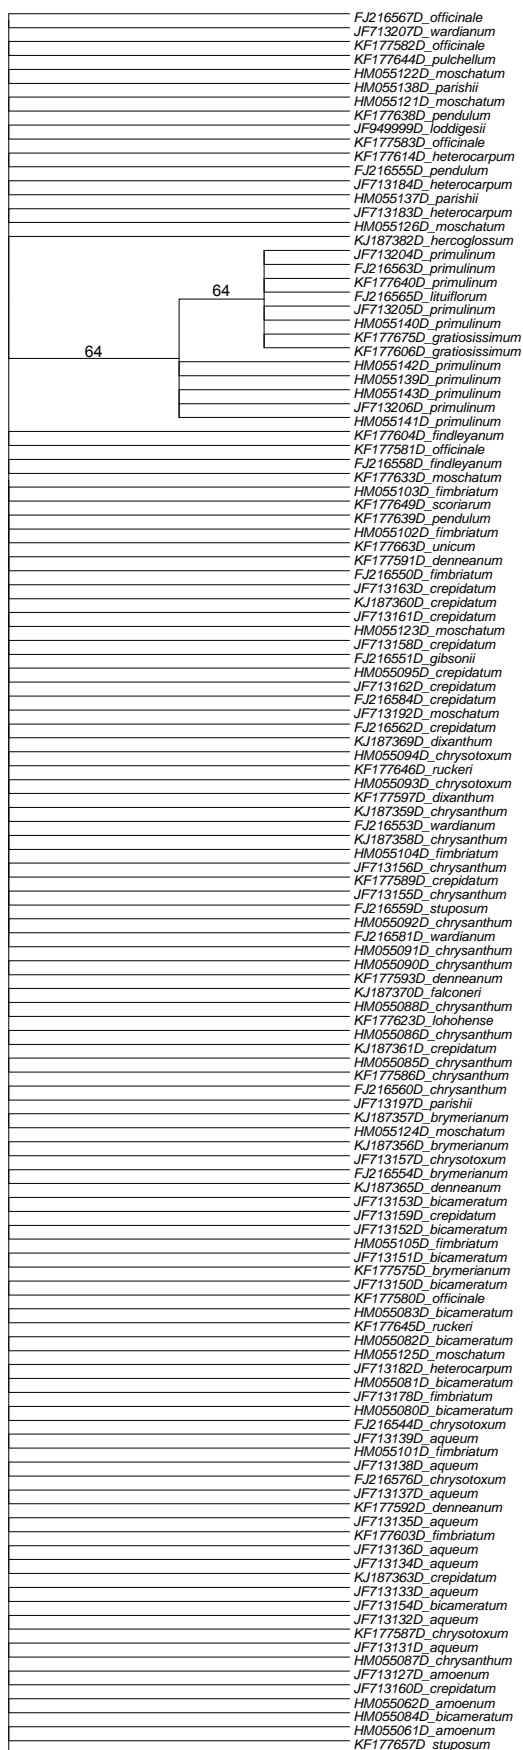

Figure S5

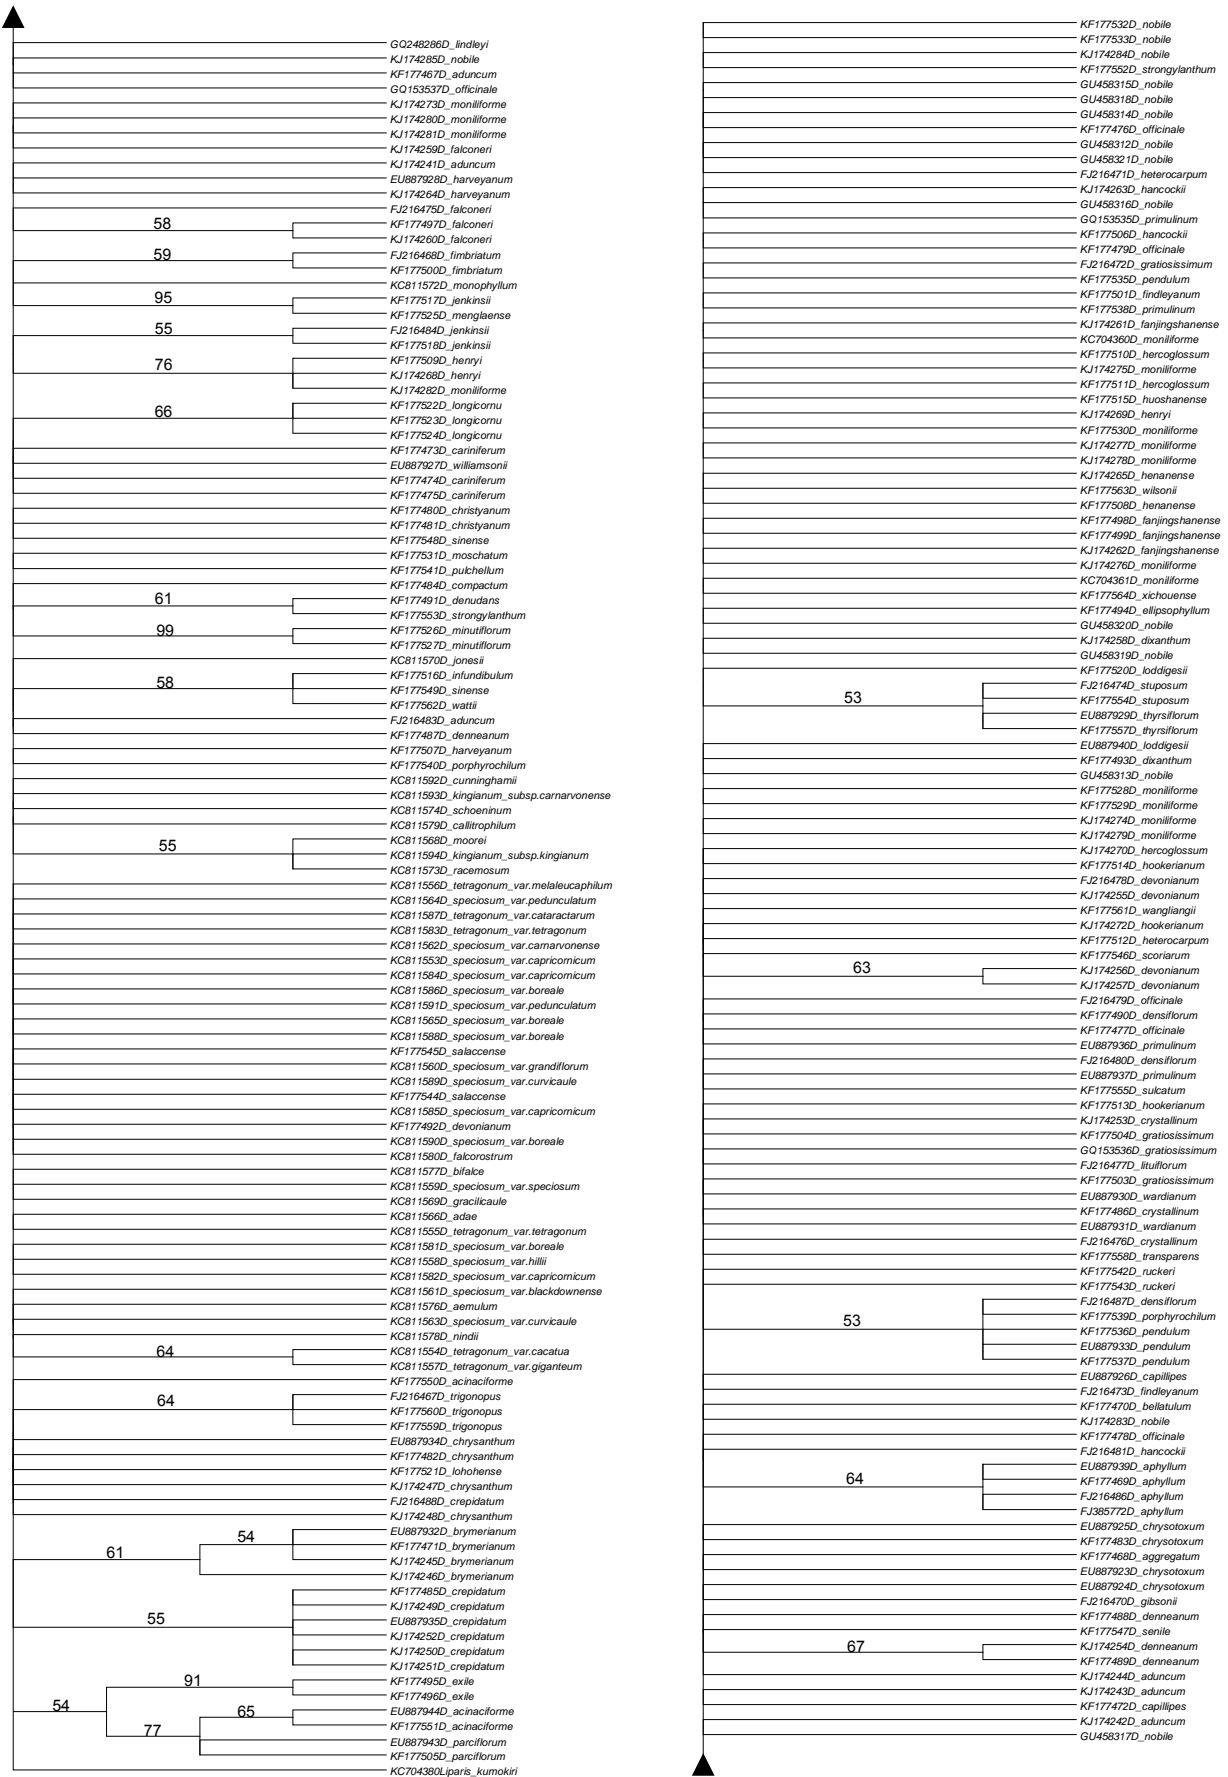

Figure S6

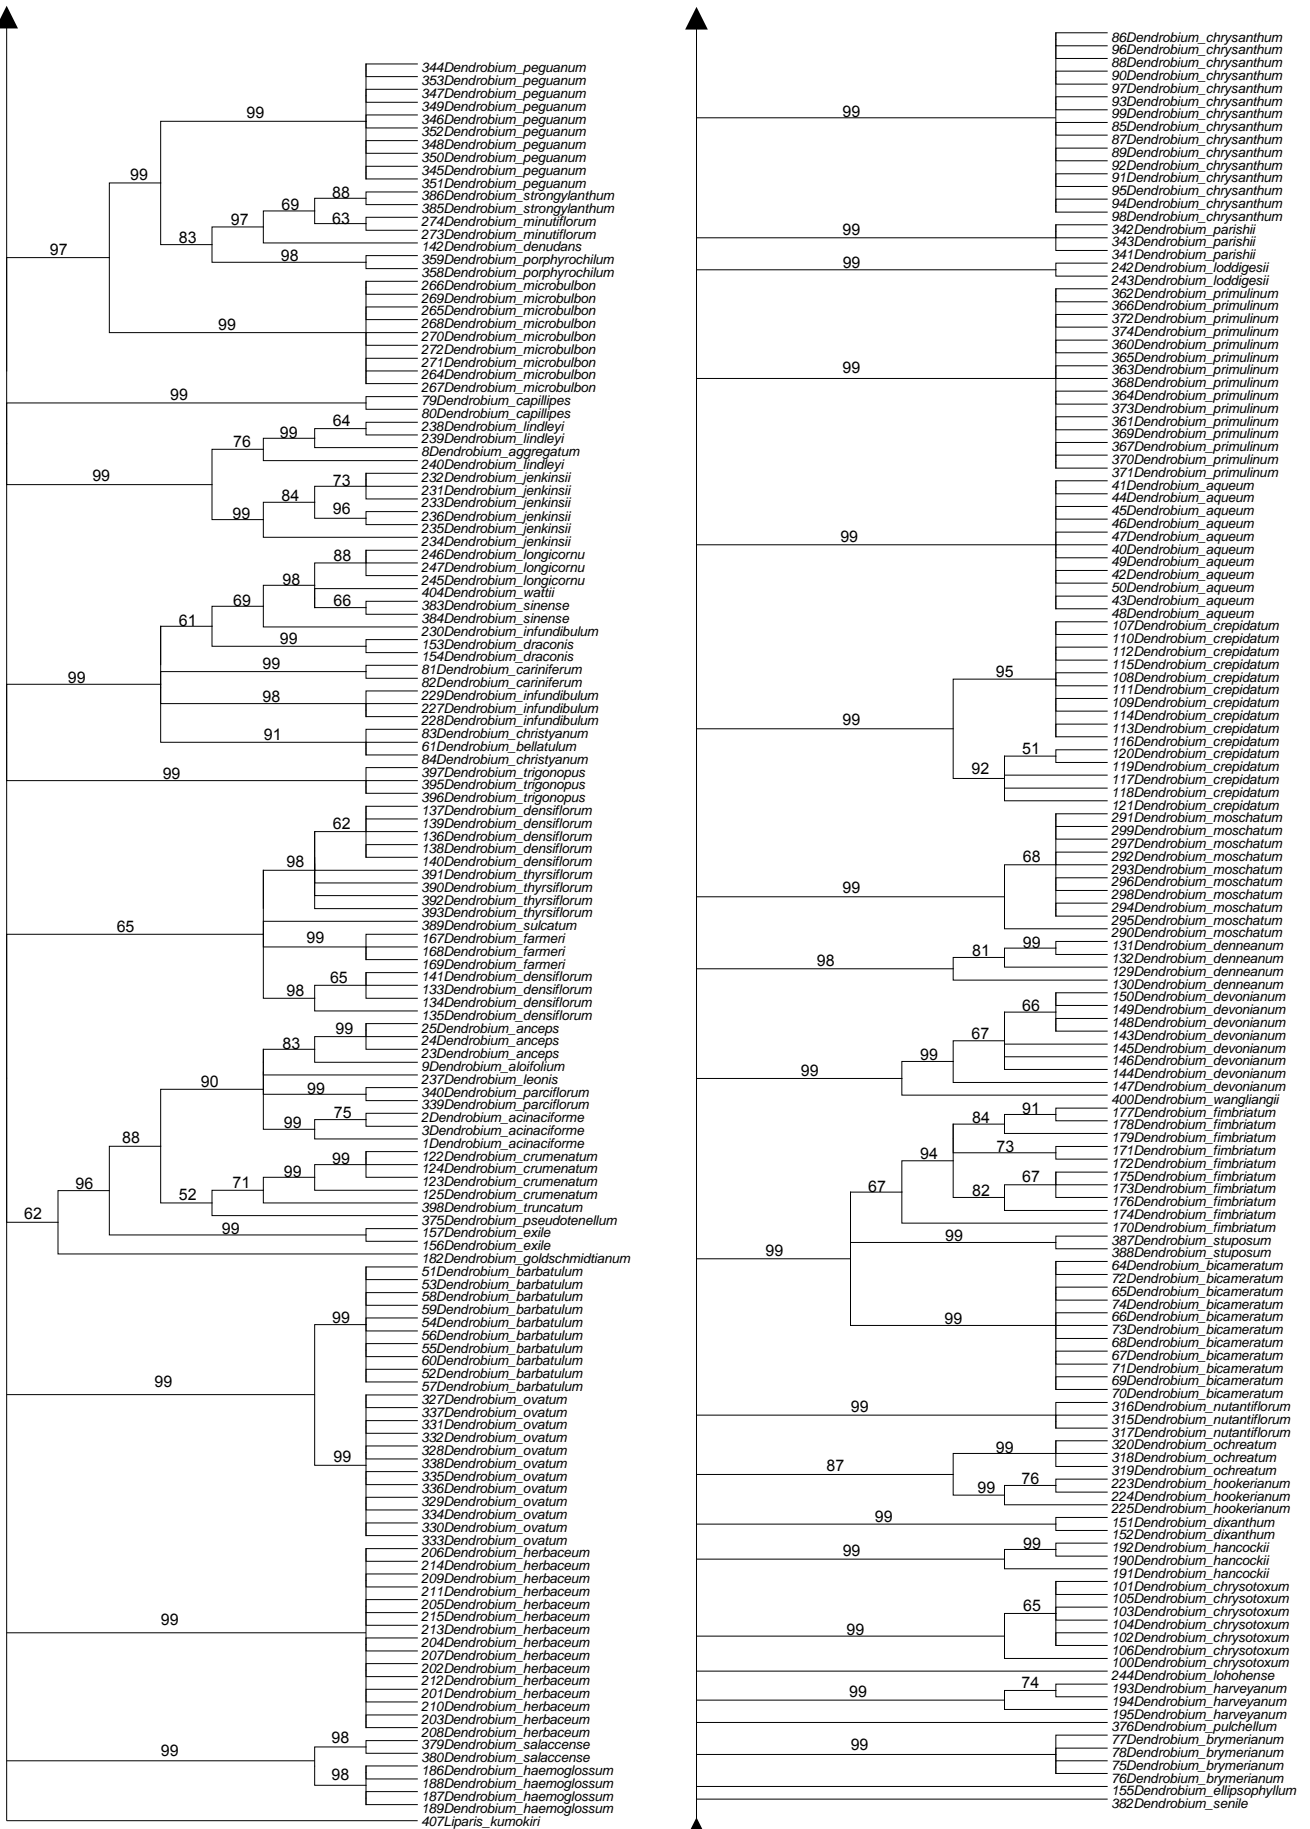

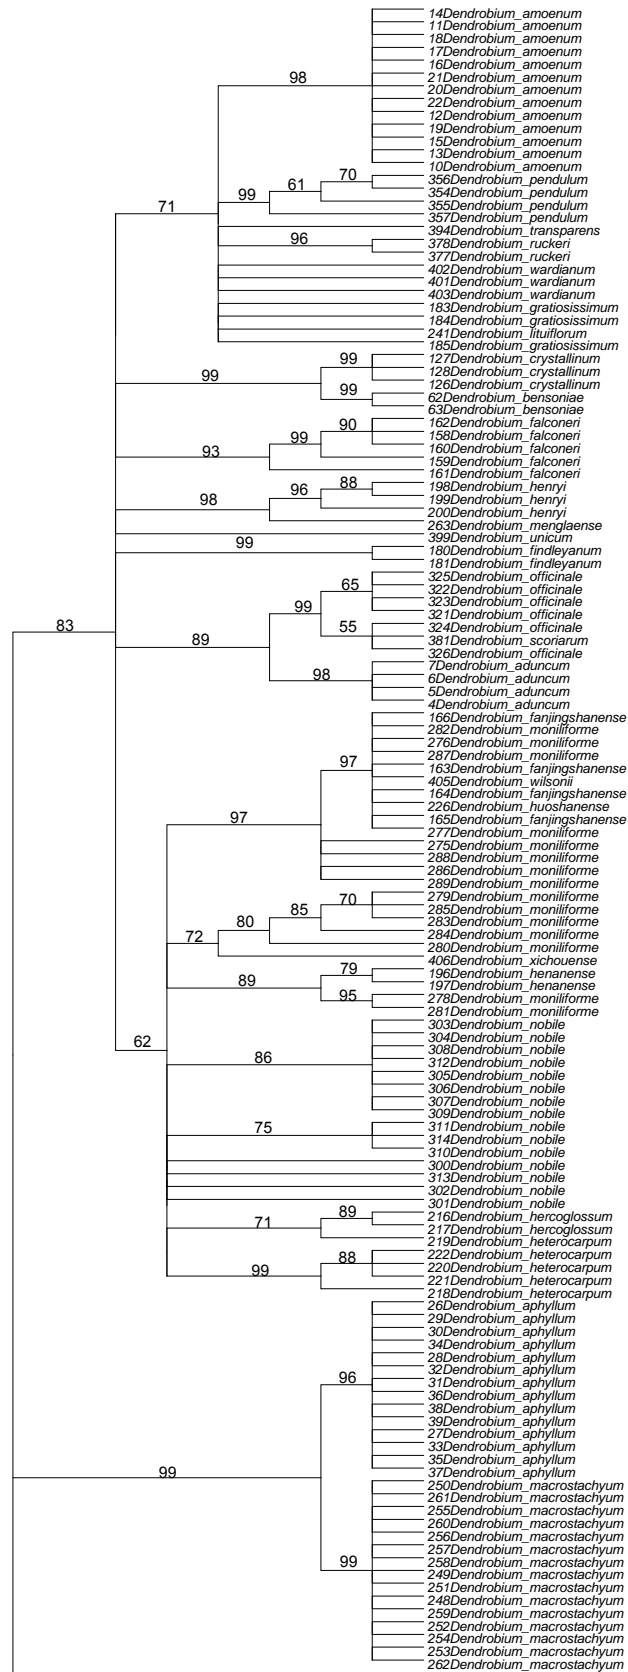



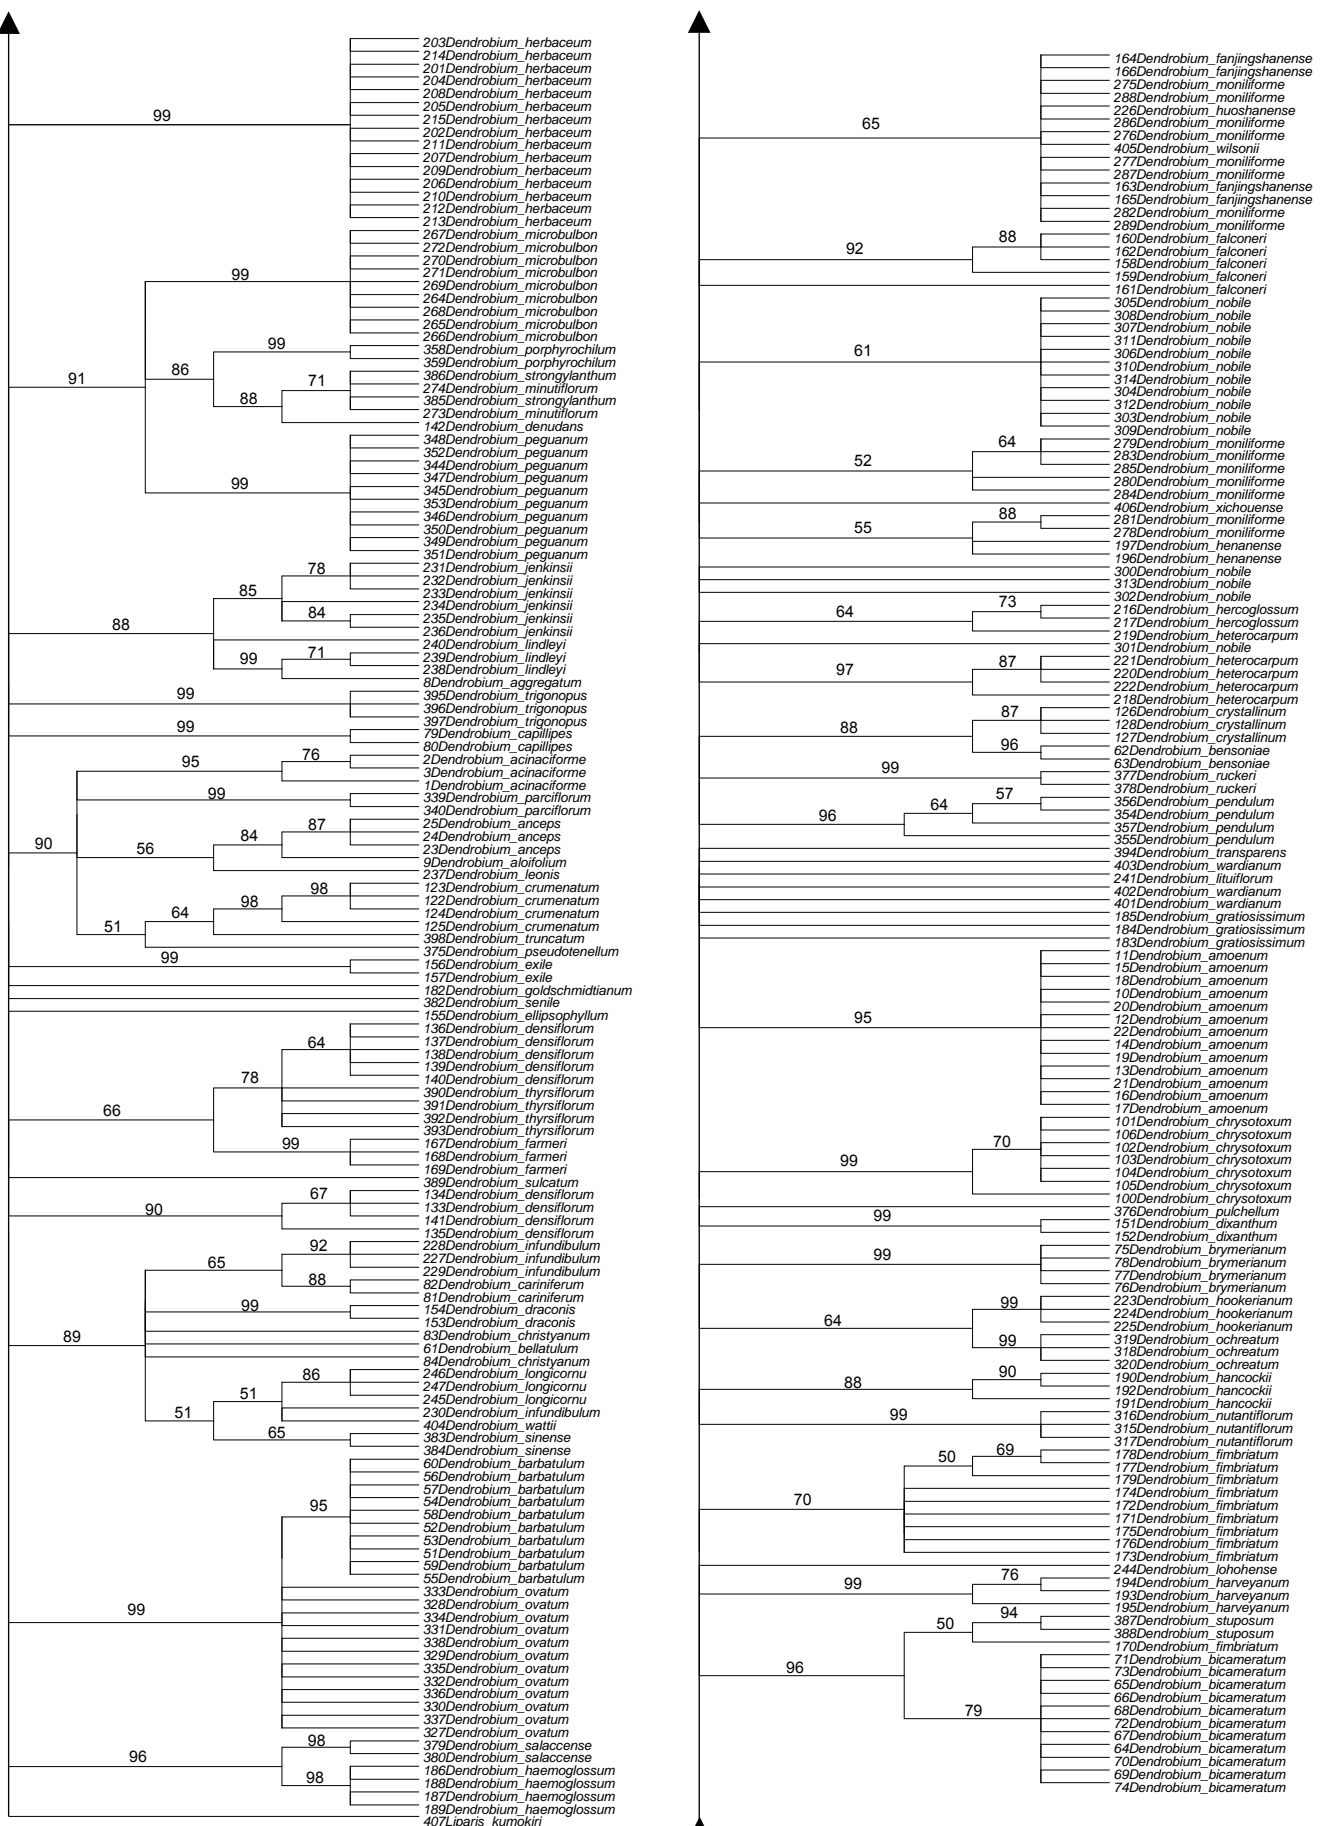

Figure S7(continued)

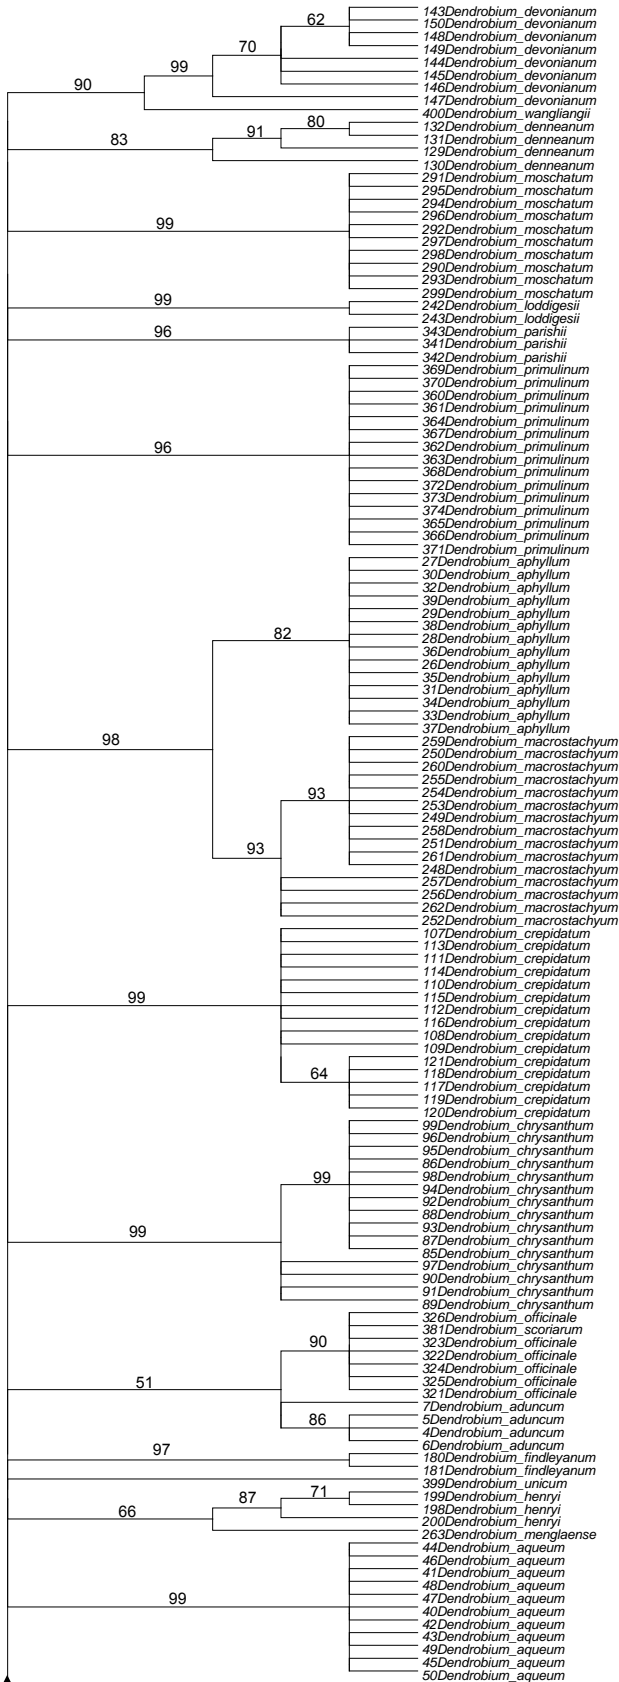

Figure S8

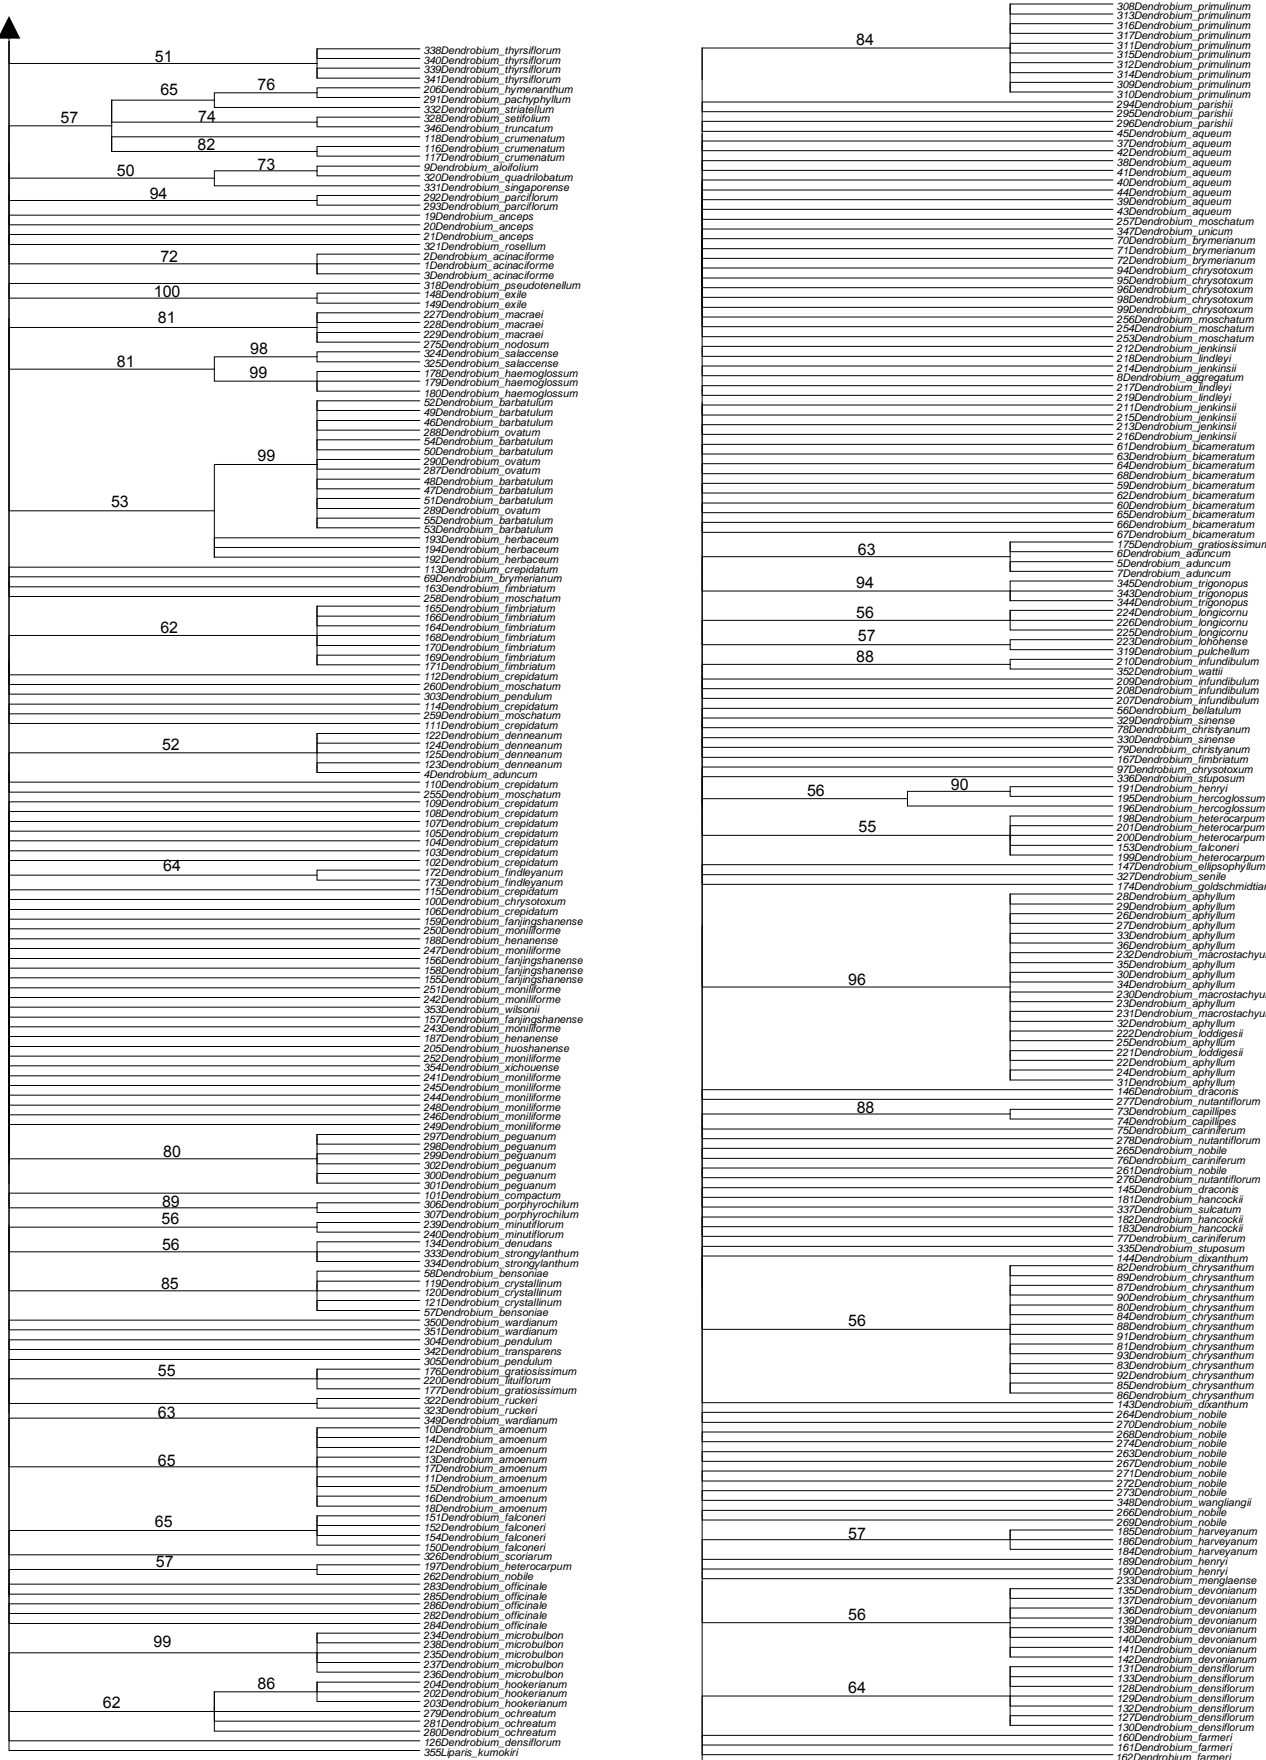

Figure S9

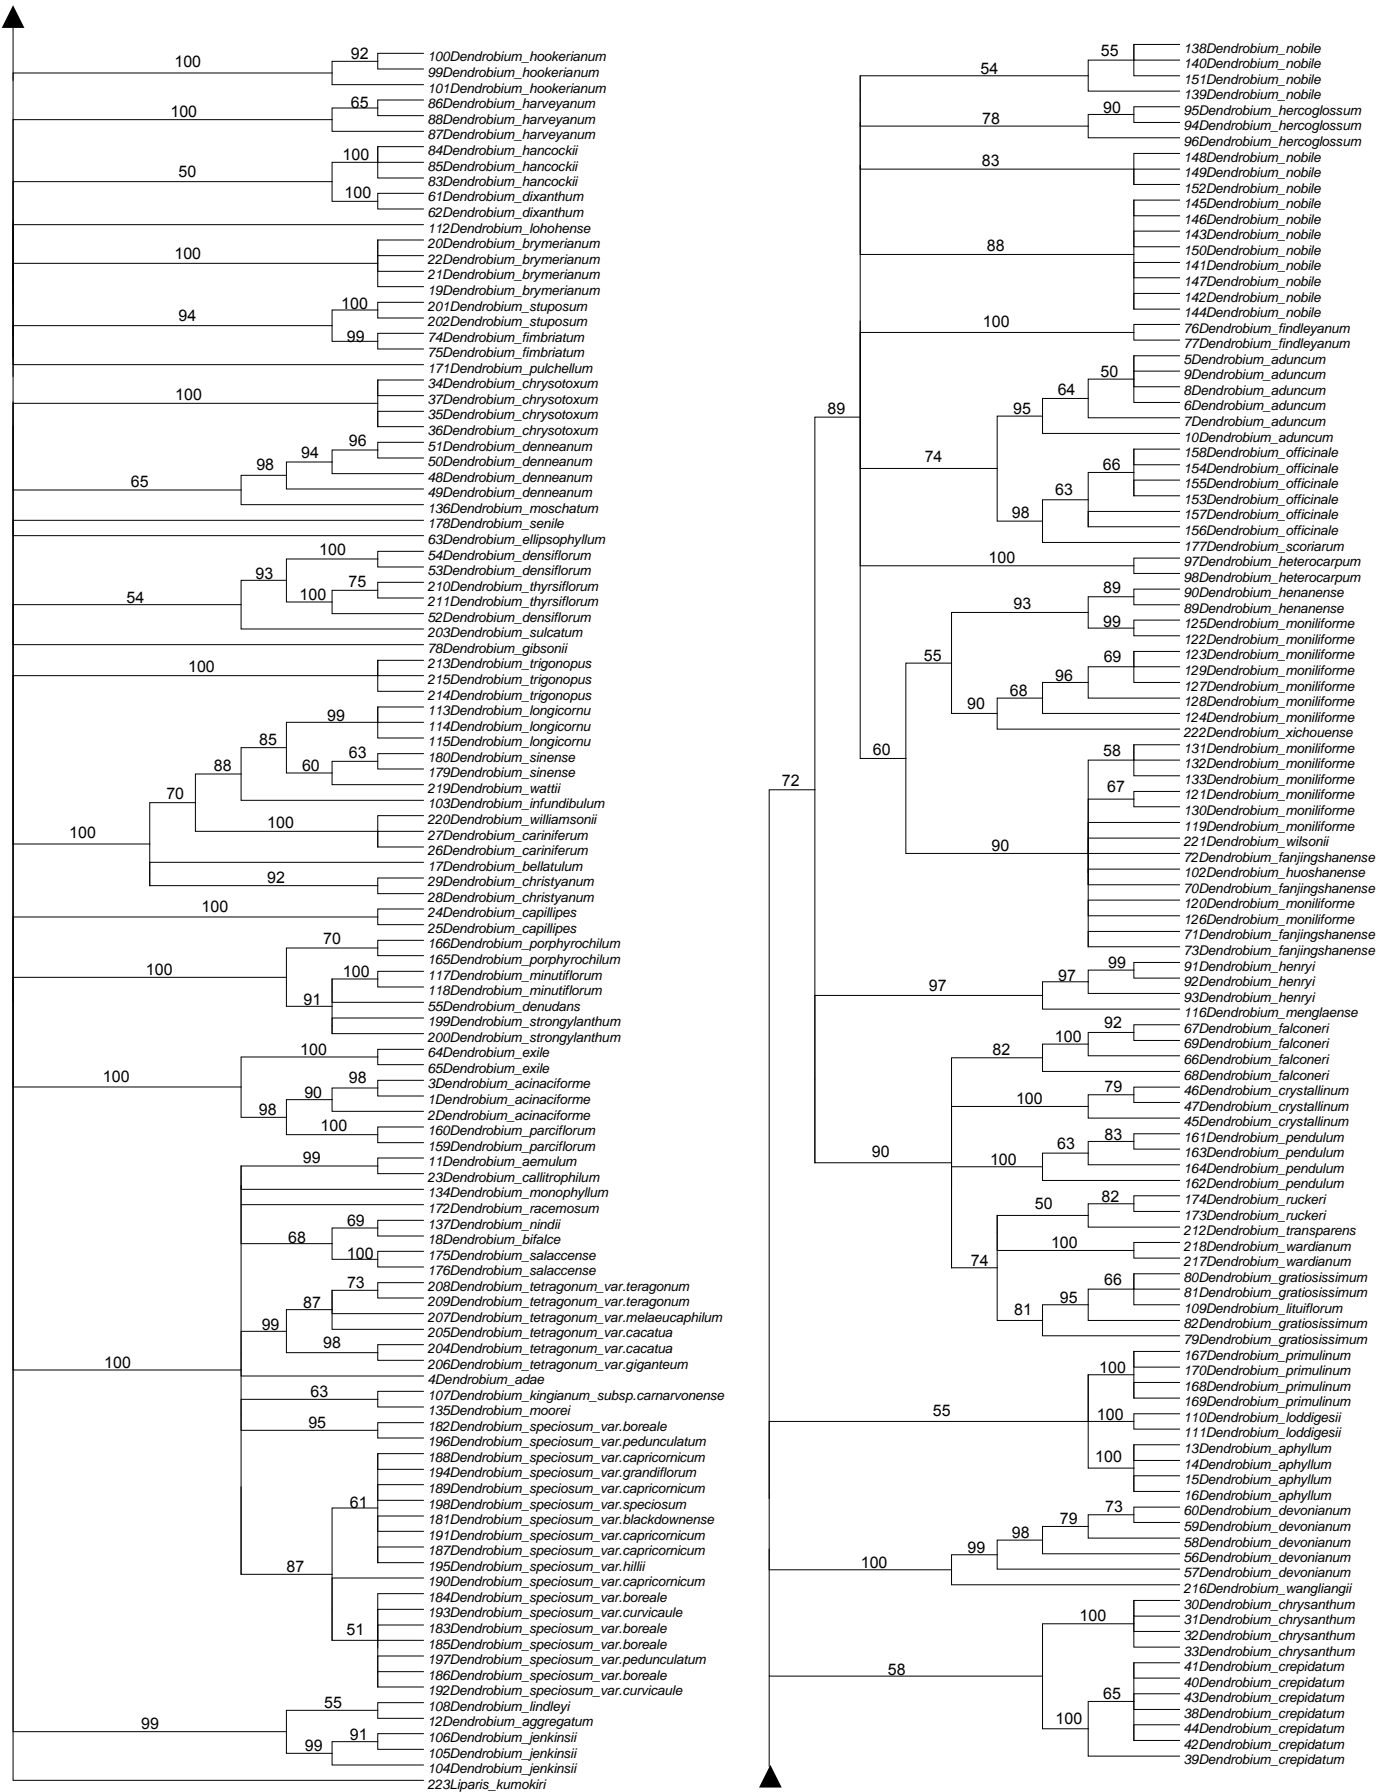

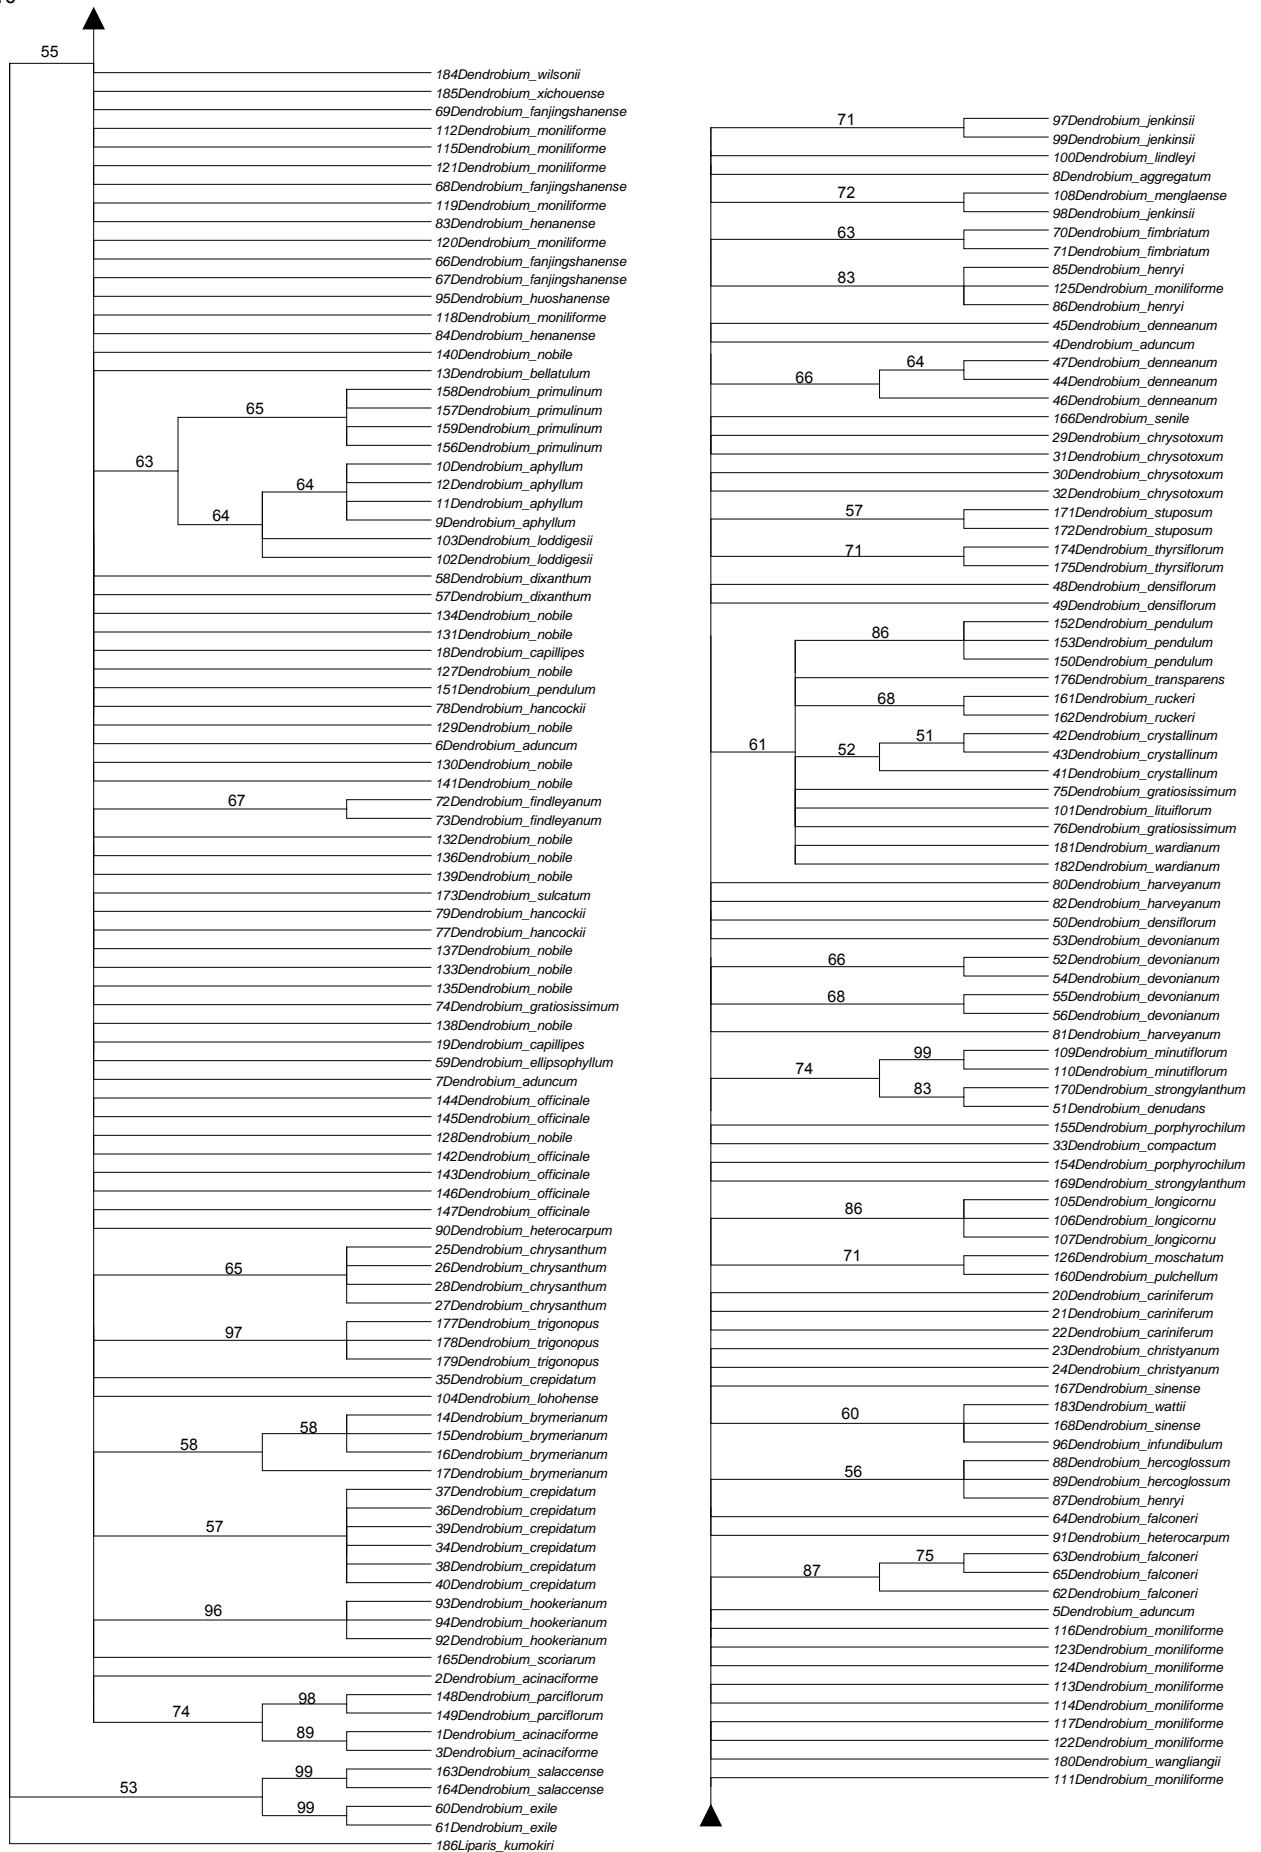

Figure S11

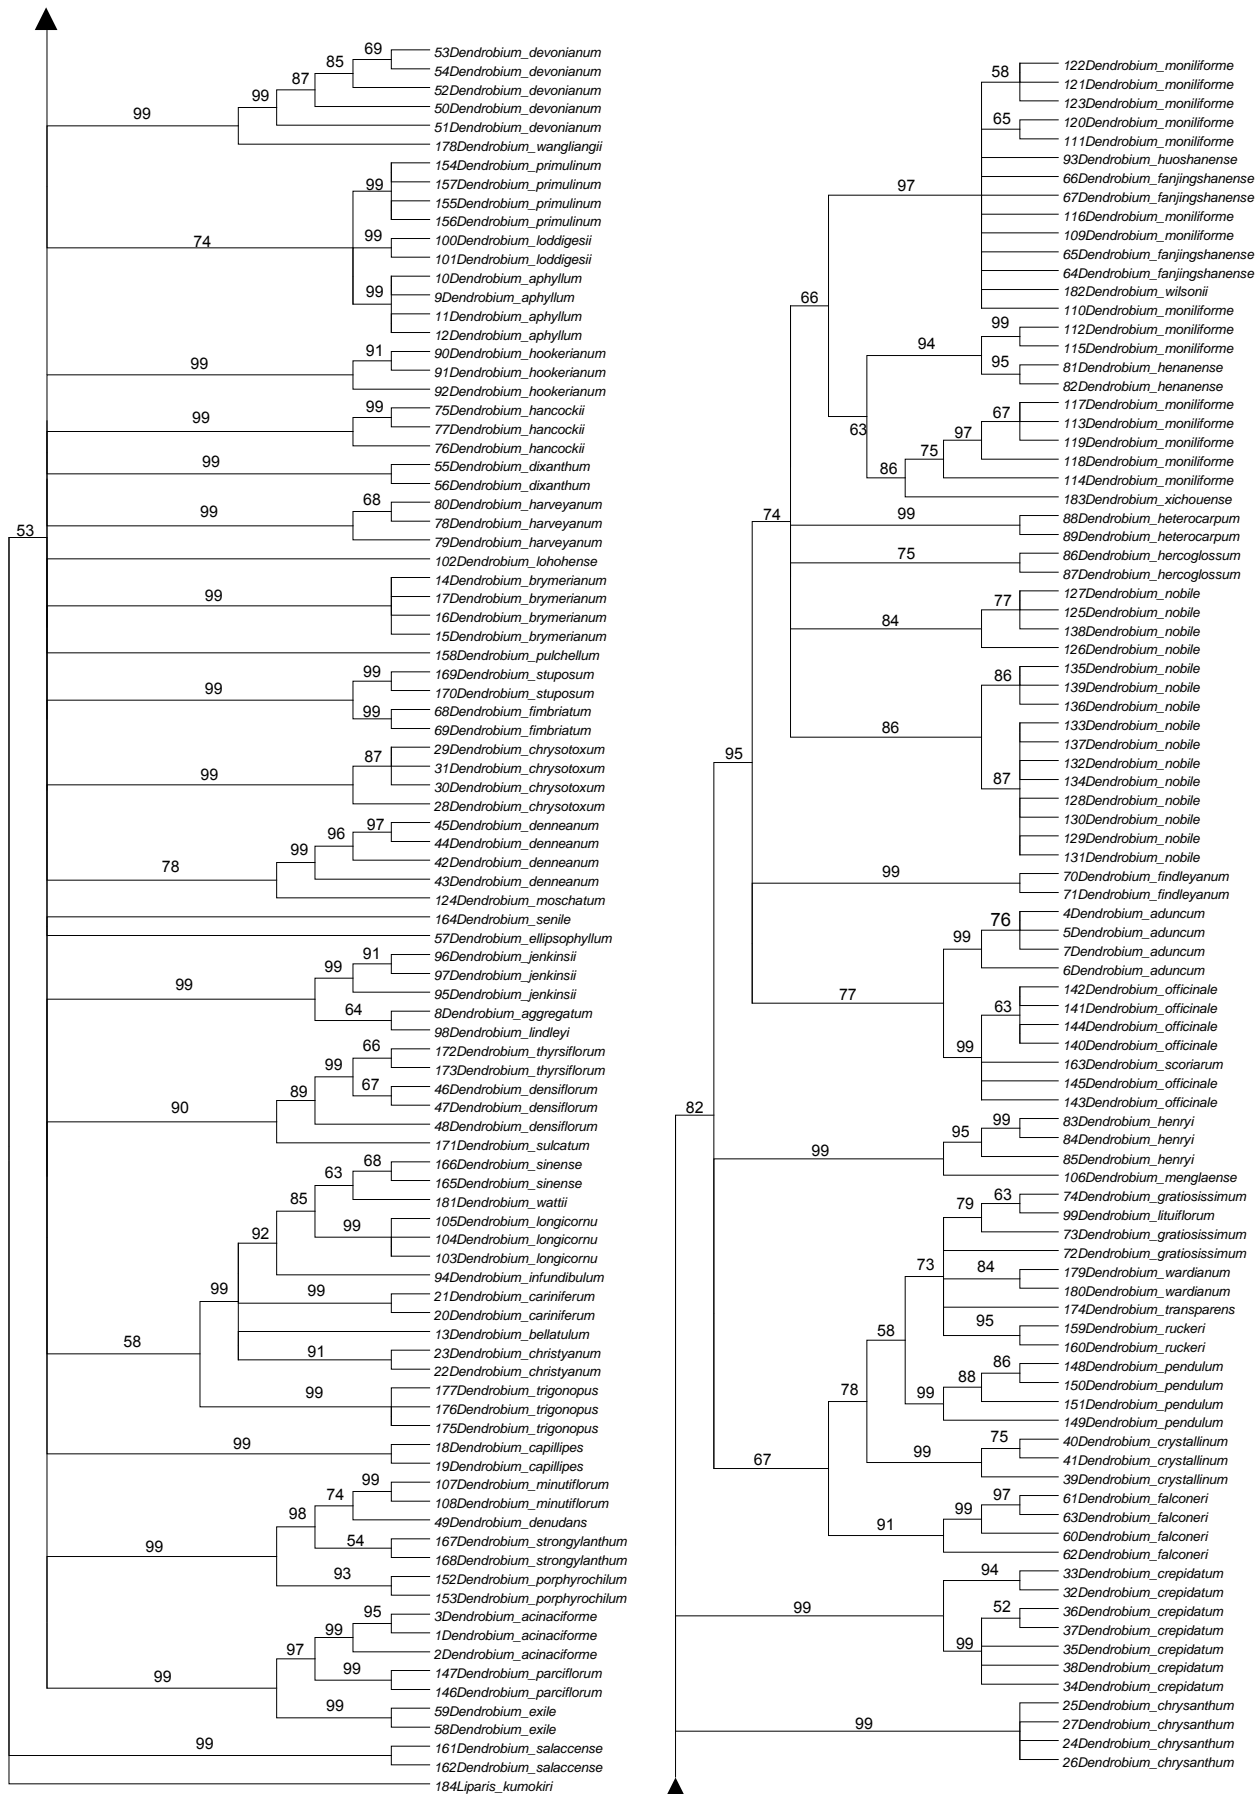

Supplement: pone.0115168.s001.pdf [file pone.0115168.s001.pdf]
